# Supplementary material for: DFT Mechanistic Investigation into Ni(II)-Catalyzed Hydroxylation of Benzene to Phenol by H2O2
Source: PubMed Central journal article supplement (PMC11186014; doi:10.1021/acs.inorgchem.3c04461), 2024-03-12
Supplement: ic3c04461_si_001.pdf [file ic3c04461_si_001.pdf]

# DFT Mechanistic Investigation into Ni(II)-Catalyzed Hydroxylation of Benzene to Phenol by H<sub>2</sub>O<sub>2</sub>

Kaveh Farshadfar,\* and Kari Laasonen\*

Department of chemistry and material science, School of chemical engineering, Aalto University,  
02150 Espoo, Finland

Email: Kaveh.Farshadfar@aalto.fi, Kari.Laasonen@aalto.fi

## Content:

**Figure S1.** Relative free energy of different dinickel bis( $\mu$ -oxo) and  $\mu$ - $\eta^2$ : $\eta^2$ -peroxo isomer forms. (page S2)

**Figure S2.** DFT calculated reaction potential pathways potential substitution reactions benzene and **2**<sup>S</sup> and addition of benzene to **5**<sup>2</sup>. (page S3)

**Figure S3.** Stability comparison between complexes with mono- and bi-coordinated solvents to nickel relative to [Ni<sup>II</sup>(tepa)]<sup>2+</sup> (**8**). (page S4)

**Other pathways to generate Ni-oxyl species** (page S4)

**Figure S4.** Calculated mechanism for heterolytic cleavage of **5**<sup>2</sup>. (page S5)

**Figure S5.** Spin density distribution plots for key Ni species at an isosurface value of 0.006. (page S6)

**Scheme S1.** DFT-proposed catalytic cycle for hydrogenation of benzene using H<sub>2</sub>O<sub>2</sub> catalyzed by [Ni<sup>II</sup>(tepa)]<sup>2+</sup> (**8**). (page S7)

**Table S1.** Cartesian coordinates and total energies for all of the calculated structures. (page S8)

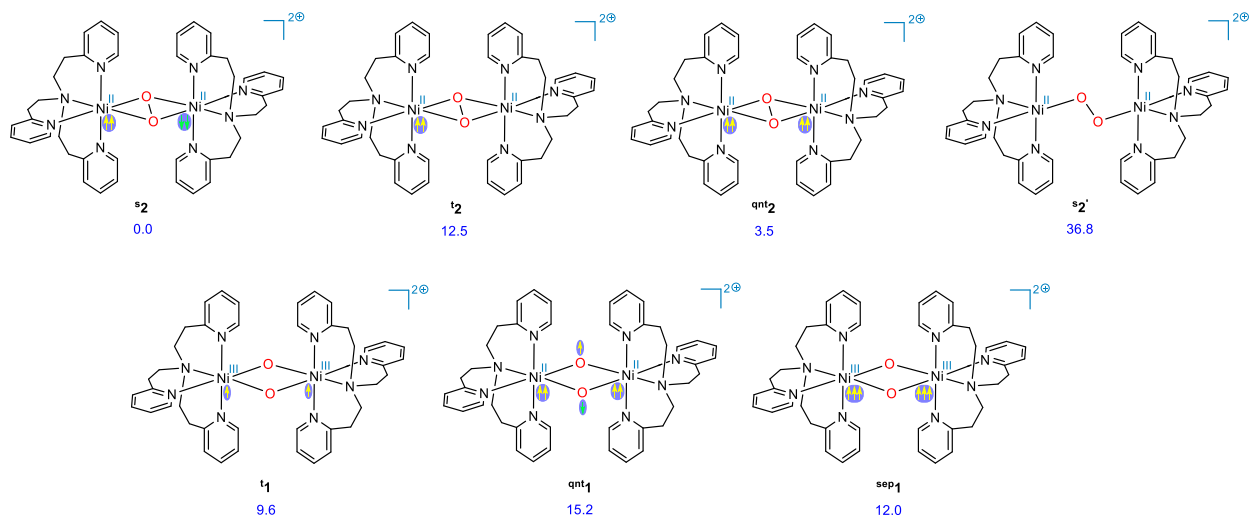

**Figure S1.** Relative free energy of different dinickel bis(μ-oxo) and μ-η<sup>2</sup>:η<sup>2</sup>-peroxo isomer forms. The superscripts "s", "t", "qnt", and "sep" represent the singlet, triplet, quintet, and septet ground states, respectively. Free energies calculated at the SMD/B3LYP-D3/def2-TZVP//SMD/B3LYP-D3/6-31G(d),SDD level of theory level of theory are given in kcal/mol (in blue). Our attempts to locate other potential bis(μ-oxo) and μ-η<sup>2</sup>:η<sup>2</sup>-peroxo ground states were unsuccessful and collapsed to one of the given structures.

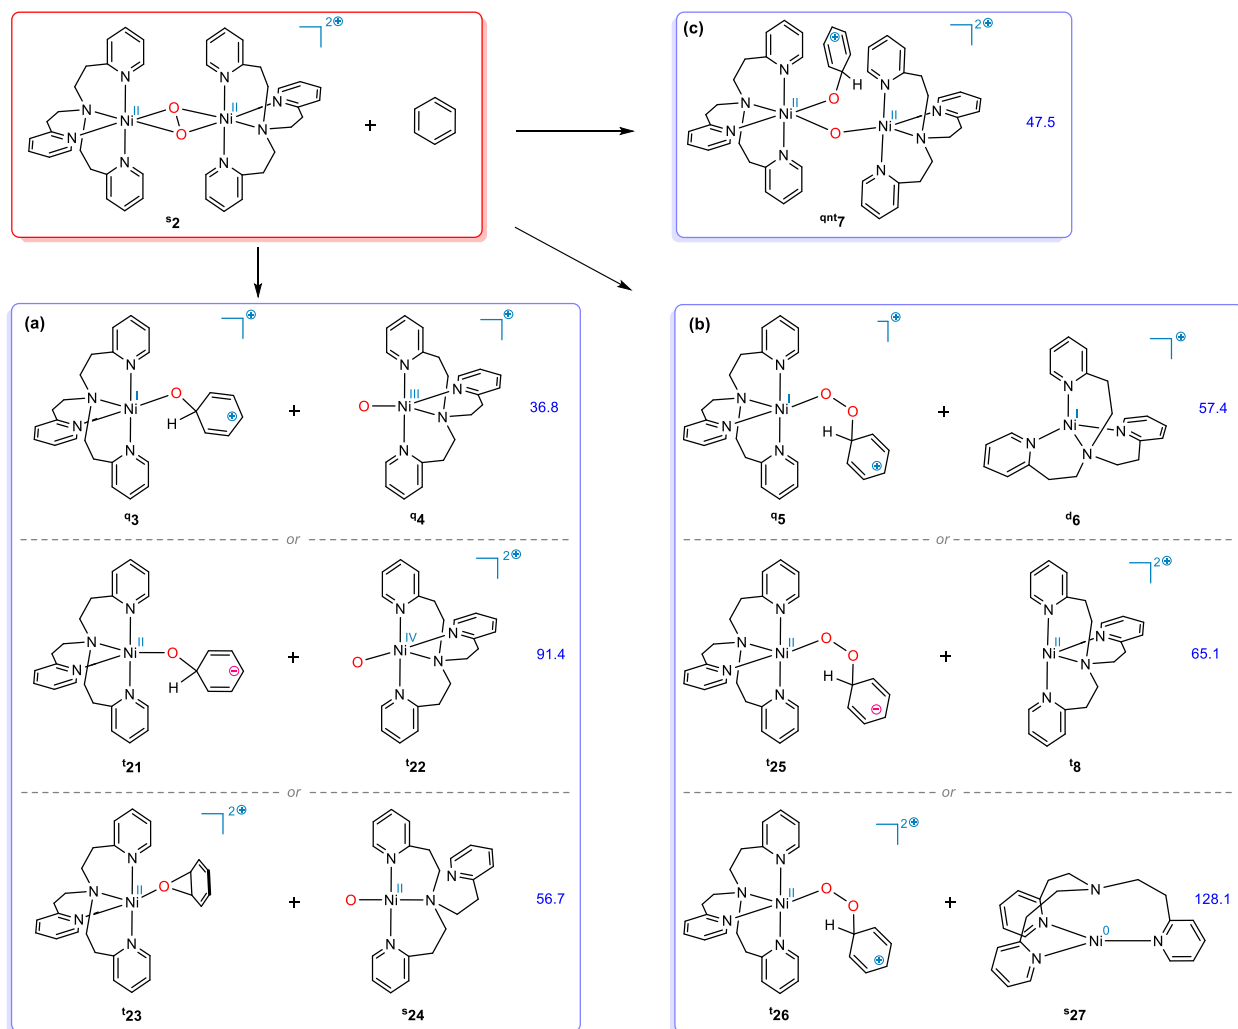

**Figure S2.** DFT calculated reaction potential pathways at the SMD/B3LYP-D3/def2-TZVP//SMD/B3LYP-D3/6-31G(d),SDD level of theory for the (a) and (b) potential substitution reactions benzene and  $s_2$  (c) addition of benzene to  $s_2$ . The superscripts "s", "d", "t", "q", and "qnt" represent the singlet, doublet, triplet, quartet, and quintet ground states, respectively. Free energies are given in kcal/mol (in blue)

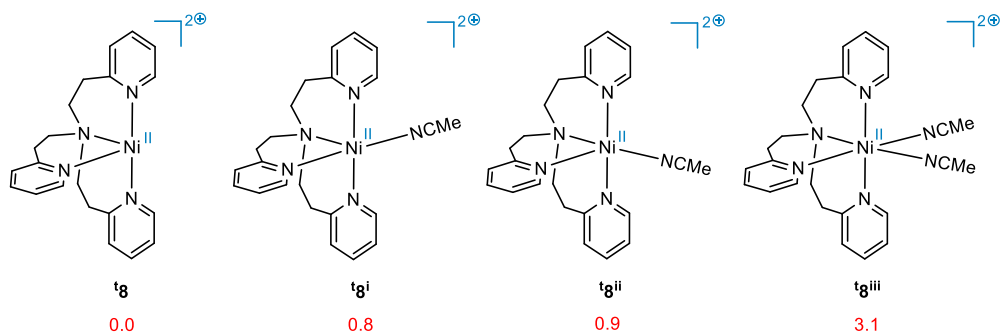

**Figure S3.** Stability comparison between complexes with mono- and bi-coordinated solvents to nickel relative to  $[Ni^{II}(\text{tepa})]^{2+}$  ( $t_8$ ). The superscript "t" represents the triplet ground states. The relative Gibbs free obtained from the SMD/B3LYP-D3/def2-TZVP//SMD/B3LYP-D3/6-31G(d),SDD calculations are given in kcal/mol (in red).

### Other pathways to generate Ni-oxyl species

We thoroughly explored the other potential pathways for Ni-oxyl species generation as intermediates for this transformation. As illustrated in Figure 5c, homolytic cleavage of  $^5\mathbf{2}$  can generate  $^9\mathbf{4}$ , which exhibits high activation energies for benzene binding and, therefore, cannot occur. Heterolytic cleavage of  $^5\mathbf{2}$  results in the generation of  $t_1\mathbf{17}$  alongside  $t_1\mathbf{28}$ ; however, this reaction is strongly thermodynamically unfavorable. We also explored the generation of  $t_1\mathbf{17}$  through the decomposition of  $^{\text{ant}}\mathbf{20}$  into  $t_1\mathbf{17}$  and  $t_1\mathbf{12}$ , and it was found that there is a high energy barrier for this dissociation (Figure S4).

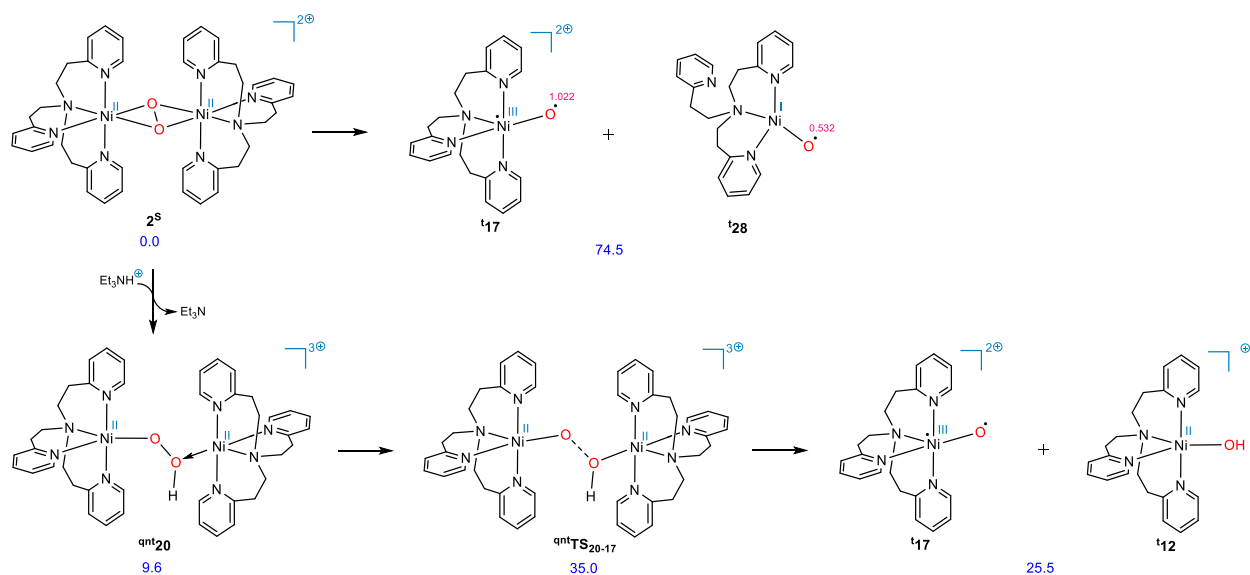

**Figure S4.** Calculated mechanism for heterolytic cleavage of **2** resulting in the generation of **17** and **18** (top) and for production of **17** from decomposition of **qnt20** (bottom). The superscripts "s", "t", and "qnt" represent the singlet, triplet, and quintet ground states, respectively. The relative Gibbs free obtained from the SMD/B3LYP-D3/def2-TZVP//SMD/B3LYP-D3/6-31G(d),SDD calculations are given in kcal/mol (in blue). The relative Gibbs free obtained from the SMD/B3LYP-D3/def2-TZVP//SMD/B3LYP-D3/6-31G(d),SDD calculations are given in kcal/mol (in blue) and spin density values in e/Å<sup>3</sup> (in pink).

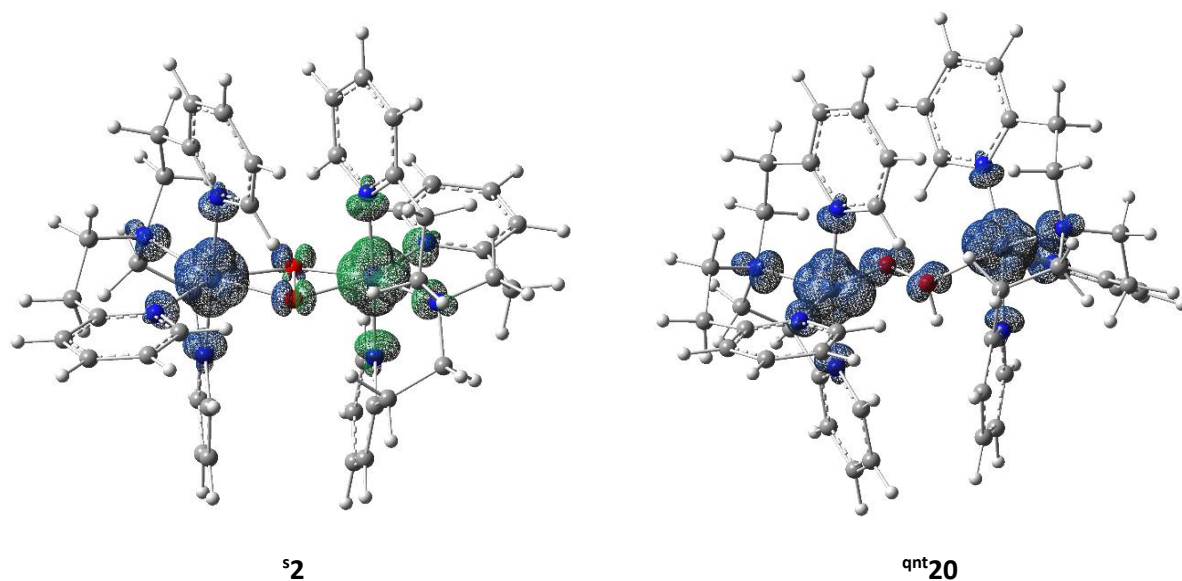

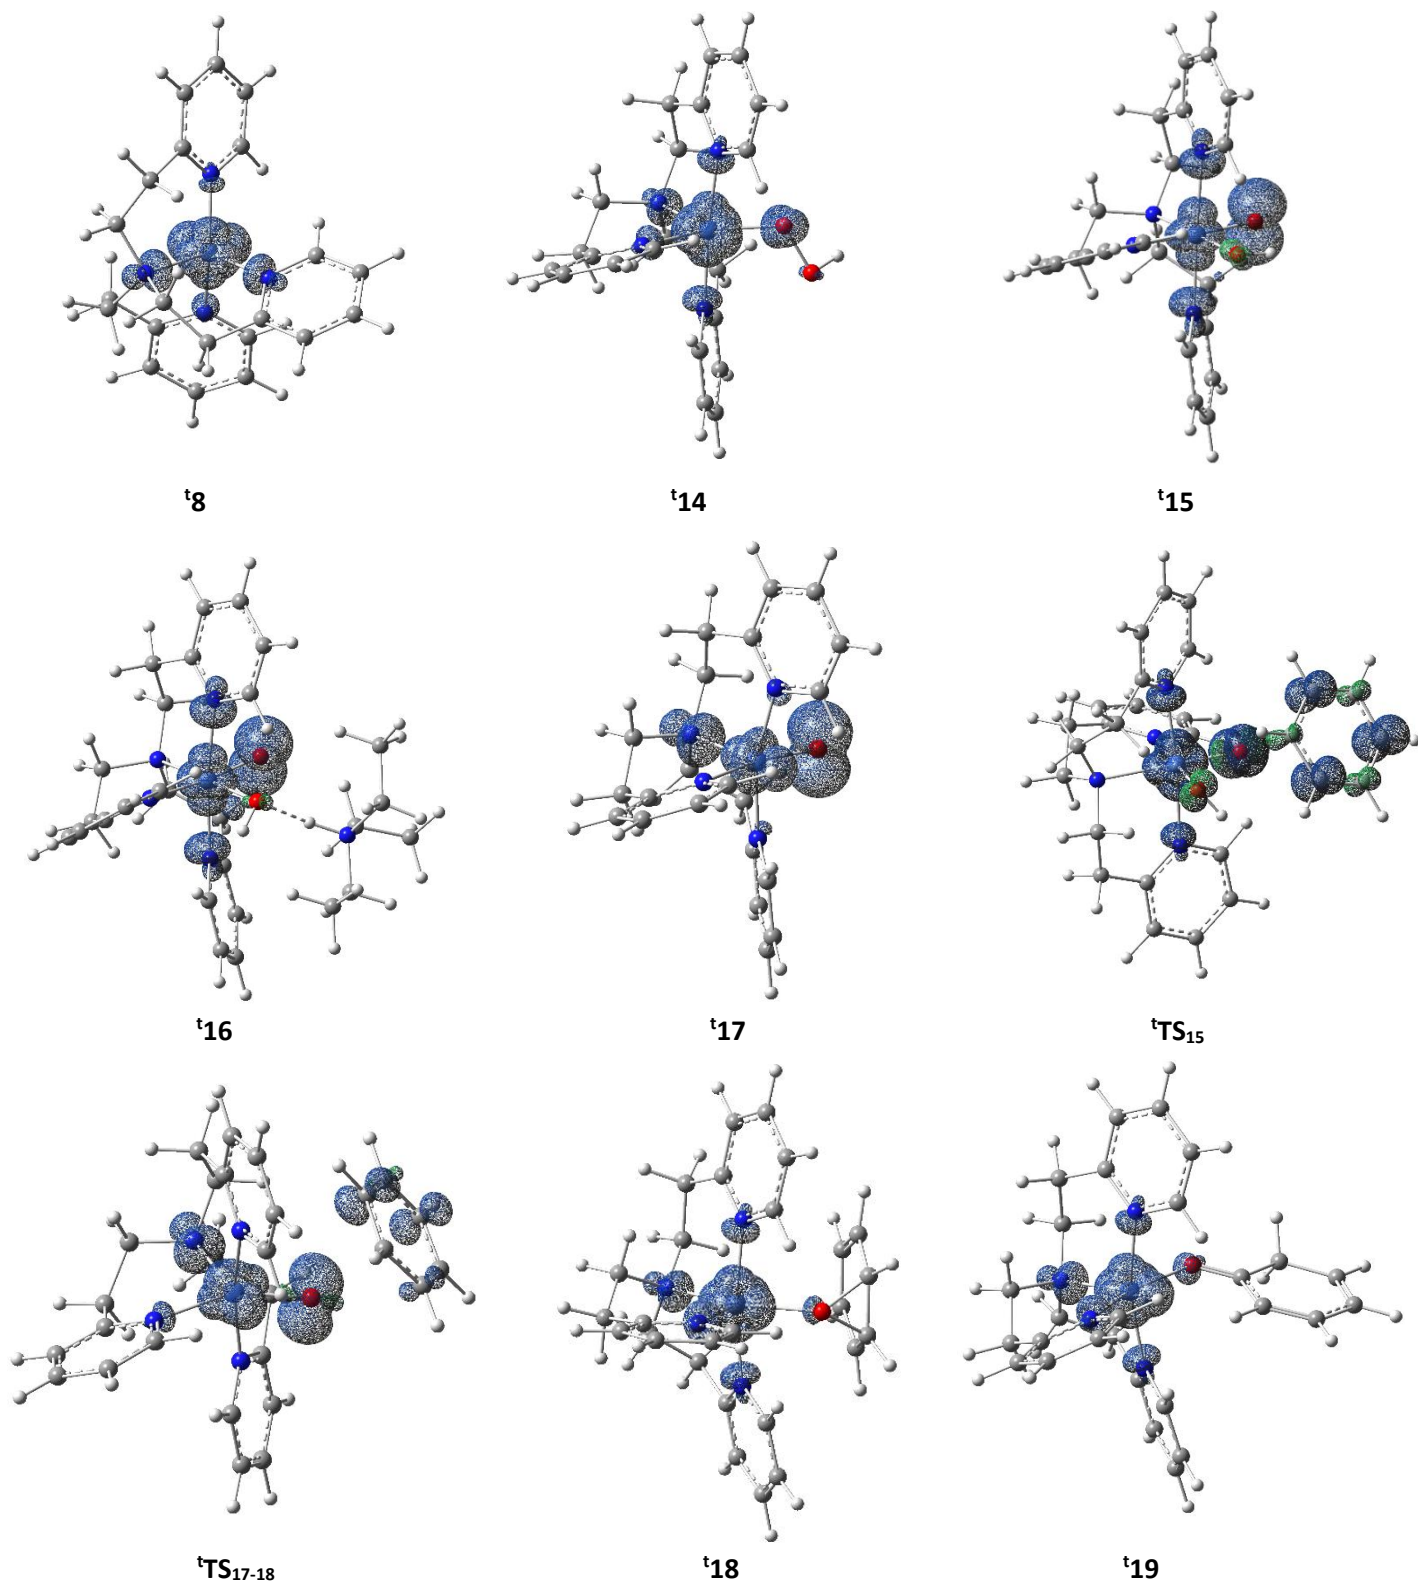

**Figure S5.** Spin density distribution plots for key Ni species at an isosurface value of 0.006. The superscripts "s", "t", and "qnt" represent the singlet, triplet, and quintet ground states, respectively.

**Scheme S1.** DFT-proposed catalytic cycle for hydrogenation of benzene using  $\text{H}_2\text{O}_2$  catalyzed by  $[\text{Ni}^{\text{II}}(\text{tepa})]^{2+}$  (**t8**). The superscripts "s", and "t" represent the singlet, and triplet ground states, respectively.

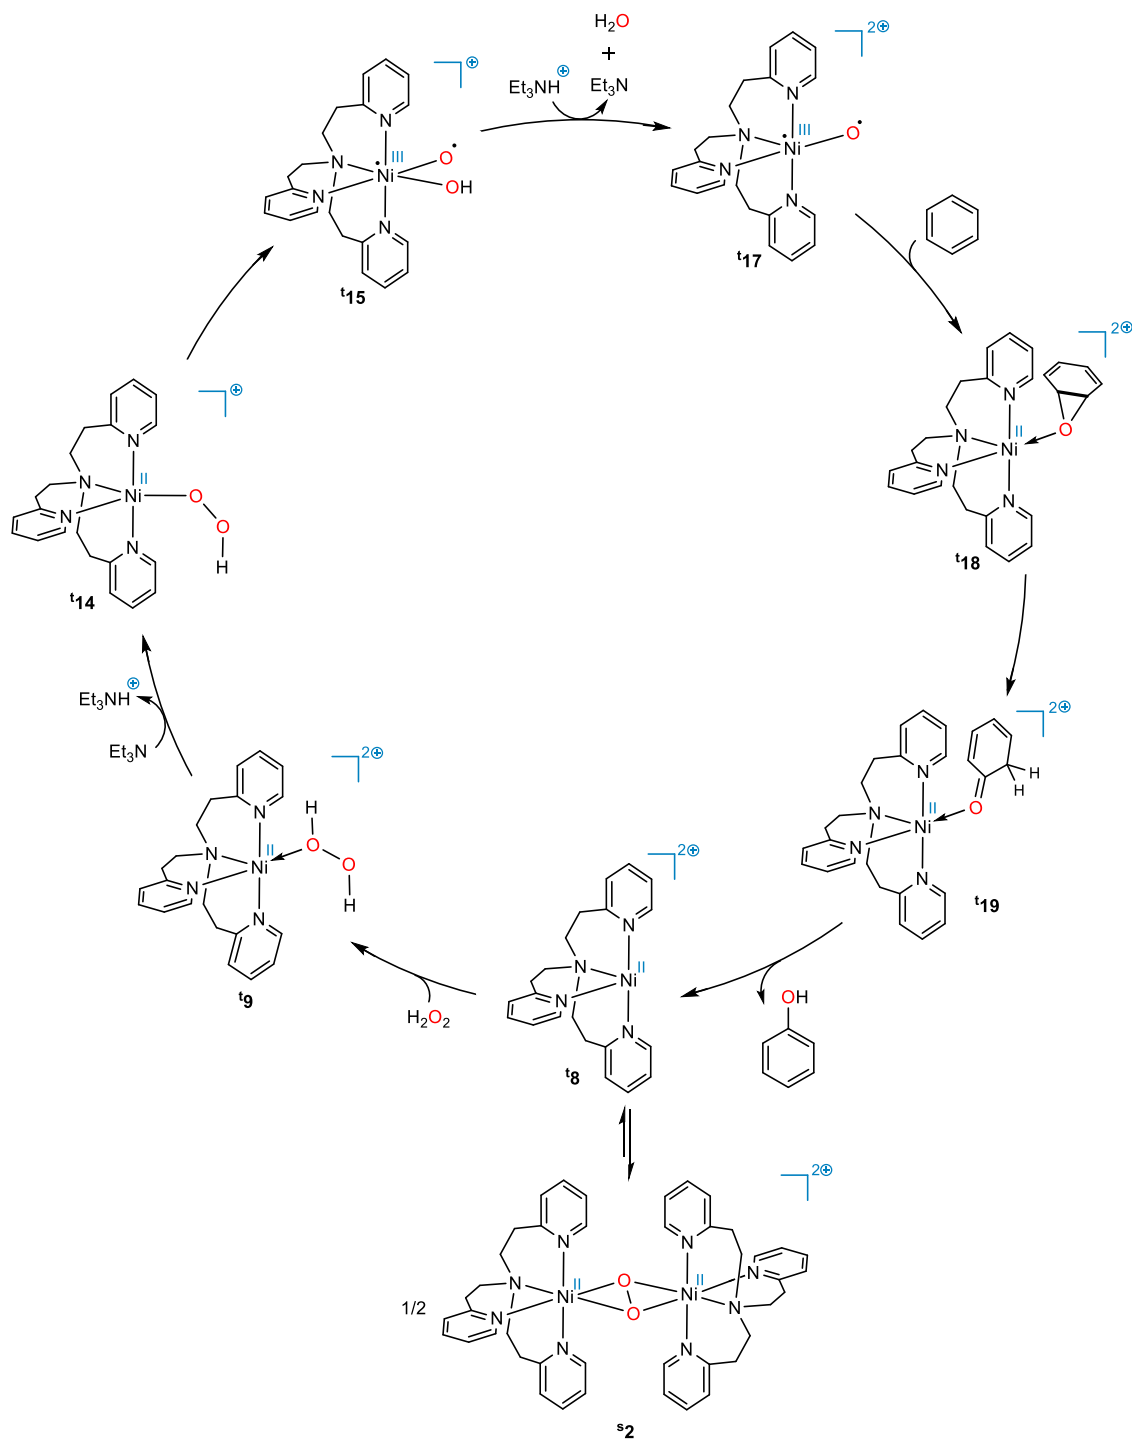

**Table S1.** Total potential (E), and Gibbs free energies (G) of all structures optimized at the SMD/B3LYP-D3/BS1 level of theory along with the total potential energies calculated by SMD/B3LYP-D3/BS2//SMD/ B3LYP-D3/BS1 and Cartesian coordinates for all of the calculated structures, as well as eigenvalues of imaginary frequencies of transition states.

52

E (SMD/B3LYP-D3/BS1) = -2559.785949 au

G (SMD/B3LYP-D3/BS1) = -2559.013923 au

E (SMD/B3LYP-D3/BS2//SMD/B3LYP-D3/BS1) = -5235.45509036 au

charge = 0

spin multiplicity = 1

|    |            |             |             |
|----|------------|-------------|-------------|
| Ni | 1.81928200 | -0.02092700 | 0.25851500  |
| N  | 3.11755700 | 0.21027000  | 2.03924300  |
| C  | 3.13476700 | -1.02347600 | 2.88927300  |
| H  | 3.99168200 | -1.63378600 | 2.60049000  |
| C  | 4.50390000 | 0.55739800  | 1.62317500  |
| H  | 5.15466300 | 0.57844900  | 2.50910500  |
| H  | 4.49336800 | 1.56108000  | 1.19851300  |
| C  | 2.66925800 | 2.74396400  | 2.36295100  |
| C  | 1.91266100 | -2.80019700 | 1.58977600  |
| C  | 1.92594400 | -4.19370600 | 1.70352400  |
| C  | 2.02316400 | -4.97380100 | 0.55216200  |
| H  | 1.86122400 | -4.65177700 | 2.68535000  |
| C  | 2.08381400 | -2.95165000 | -0.72432700 |
| C  | 2.10345400 | -4.34282900 | -0.69009700 |
| H  | 2.03123100 | -6.05765900 | 0.62319900  |
| H  | 2.13738100 | -2.40470100 | -1.65976000 |
| H  | 2.17092100 | -4.90955400 | -1.61265600 |
| C  | 4.73364500 | -0.10284300 | -0.86233900 |
| C  | 5.71922600 | -0.01496900 | -1.85285800 |
| C  | 3.07376400 | 0.21570500  | -2.46512200 |
| C  | 5.35246800 | 0.18956100  | -3.18105100 |
| H  | 6.76359700 | -0.11316800 | -1.57453800 |
| C  | 3.99814300 | 0.29954200  | -3.49926800 |
| H  | 2.00735500 | 0.28665100  | -2.65124600 |
| H  | 6.11128600 | 0.25725500  | -3.95532900 |
| H  | 3.66134700 | 0.44699100  | -4.51995500 |
| C  | 2.16063600 | 3.16204200  | 1.00255700  |
| C  | 2.17273700 | 4.52843500  | 0.67911300  |
| C  | 1.66054600 | 4.95498700  | -0.53950400 |
| H  | 2.57276700 | 5.23891000  | 1.39647300  |
| C  | 1.14951000 | 2.67089400  | -1.02522700 |
| C  | 1.12386300 | 4.00325900  | -1.41152100 |
| H  | 1.66145600 | 6.00973500  | -0.79924900 |
| H  | 0.71007600 | 1.88844300  | -1.63078500 |
| H  | 0.68579300 | 4.28550600  | -2.36311800 |
| N  | 1.67506200 | 2.25036200  | 0.14418300  |
| N  | 1.99655600 | -2.20267300 | 0.38470300  |



|    |             |             |             |
|----|-------------|-------------|-------------|
| N  | 3.42837500  | 0.02893200  | -1.17986700 |
| C  | 2.47199700  | 1.30381900  | 2.83436000  |
| H  | 2.86094200  | 1.26828900  | 3.86159200  |
| H  | 1.40408100  | 1.06969100  | 2.87933600  |
| H  | 3.72228800  | 3.03496900  | 2.45226900  |
| H  | 2.14669200  | 3.36300900  | 3.10418000  |
| C  | 5.10348900  | -0.39580800 | 0.57282600  |
| H  | 4.82154500  | -1.43284500 | 0.79047500  |
| H  | 6.19262400  | -0.34866900 | 0.66277600  |
| H  | 3.29823800  | -0.72667100 | 3.93281800  |
| C  | 1.86503100  | -1.88939100 | 2.78885400  |
| H  | 0.97510900  | -1.25274100 | 2.72387500  |
| H  | 1.78132500  | -2.49013400 | 3.69933000  |
| O  | -0.19194900 | -0.23888300 | 0.72855500  |
| Ni | -1.91147900 | -0.09932100 | -0.29326600 |
| N  | -3.15875200 | 0.07116100  | -2.01769400 |
| C  | -3.12737300 | -1.15826500 | -2.87361600 |
| H  | -3.92158000 | -1.83017200 | -2.54630600 |
| C  | -4.56514300 | 0.36213100  | -1.62189800 |
| H  | -5.20089400 | 0.36330300  | -2.51886100 |
| H  | -4.60055100 | 1.36282600  | -1.19158400 |
| C  | -2.81918500 | 2.61312700  | -2.32865400 |
| C  | -1.70384300 | -2.81663800 | -1.62524300 |
| C  | -1.46445100 | -4.19050400 | -1.72068800 |
| C  | -1.41200200 | -4.95867900 | -0.55878200 |
| H  | -1.31888100 | -4.64239600 | -2.69676800 |
| C  | -1.83970200 | -2.96287900 | 0.68804500  |
| C  | -1.60440400 | -4.33415600 | 0.67420400  |
| H  | -1.21918700 | -6.02616200 | -0.61437300 |
| H  | -1.98282300 | -2.42413700 | 1.61775500  |
| H  | -1.56462900 | -4.88932200 | 1.60531800  |
| C  | -4.75329500 | -0.35815800 | 0.84697600  |
| C  | -5.71728300 | -0.35730600 | 1.86253900  |
| C  | -3.07177100 | -0.03232000 | 2.42135800  |
| C  | -5.32806100 | -0.19212500 | 3.18934300  |
| H  | -6.76244400 | -0.49232900 | 1.60327600  |
| C  | -3.97205200 | -0.03518200 | 3.47932800  |
| H  | -2.00574200 | 0.07378600  | 2.58794900  |
| H  | -6.06937800 | -0.19171900 | 3.98329400  |
| H  | -3.61522900 | 0.08241900  | 4.49708700  |
| C  | -2.34784500 | 3.00704700  | -0.94914300 |
| C  | -2.40523400 | 4.36346000  | -0.59302100 |
| C  | -1.92270900 | 4.77648000  | 0.64180700  |
| H  | -2.81489800 | 5.07815900  | -1.30066500 |
| C  | -1.34980400 | 2.49623500  | 1.07612300  |
| C  | -1.36776300 | 3.81871400  | 1.49453600  |
| H  | -1.95822000 | 5.82398400  | 0.92703500  |

|   |             |             |             |
|---|-------------|-------------|-------------|
| H | -0.88678800 | 1.71842700  | 1.66772800  |
| H | -0.94625900 | 4.08843700  | 2.45721500  |
| N | -1.85126900 | 2.08290100  | -0.10764200 |
| N | -1.89382100 | -2.22422100 | -0.43016200 |
| N | -3.44727500 | -0.17790600 | 1.13586500  |
| C | -2.56301300 | 1.19001900  | -2.81619300 |
| H | -2.95416600 | 1.14078700  | -3.84185000 |
| H | -1.48607200 | 1.00532100  | -2.86345400 |
| H | -3.87959400 | 2.87097800  | -2.43073700 |
| H | -2.30285100 | 3.26560400  | -3.04505700 |
| C | -5.14721000 | -0.61492500 | -0.58762300 |
| H | -4.87427500 | -1.64833800 | -0.83320800 |
| H | -6.23759400 | -0.56253000 | -0.66012700 |
| H | -3.36314600 | -0.87000400 | -3.90585200 |
| C | -1.79788400 | -1.92802600 | -2.83712200 |
| H | -0.95117500 | -1.23220800 | -2.83578900 |
| H | -1.72398000 | -2.53754700 | -3.74269000 |
| O | 0.06293900  | -0.19526900 | -0.77068900 |

¶3

E (SMD/B3LYP-D3/BS1) = -1512.12073459 au

G (SMD/B3LYP-D3/BS1) = -1511.654576 au

E (SMD/B3LYP-D3/BS2//SMD/B3LYP-D3/BS1) = -2850.04852413 au

charge = 1 spin multiplicity = 4

|    |             |             |             |
|----|-------------|-------------|-------------|
| Ni | 0.17872300  | 0.01435400  | -0.11724600 |
| N  | 0.50438400  | 0.02955600  | 2.01549600  |
| C  | 0.27712700  | -1.33715300 | 2.60406800  |
| H  | 1.24403400  | -1.82802800 | 2.72203000  |
| C  | 1.87707600  | 0.49286100  | 2.36512700  |
| H  | 2.03347800  | 0.35585400  | 3.44422500  |
| H  | 1.94144800  | 1.56077000  | 2.15609300  |
| C  | -0.44734100 | 2.42914900  | 2.27826900  |
| C  | 0.10609400  | -2.90107600 | 0.63683900  |
| C  | 0.17245000  | -4.28673100 | 0.46844800  |
| C  | 0.91040800  | -4.81372100 | -0.59118000 |
| H  | -0.34858000 | -4.93696000 | 1.16408800  |
| C  | 1.46621900  | -2.57452100 | -1.22181000 |
| C  | 1.57543500  | -3.94225400 | -1.45504500 |
| H  | 0.96877700  | -5.88851100 | -0.73767800 |
| H  | 1.95710700  | -1.84865600 | -1.86276400 |
| H  | 2.16341400  | -4.30731500 | -2.29069600 |
| C  | 3.25133900  | 0.34030900  | 0.20883400  |
| C  | 4.55418300  | 0.61707900  | -0.22094300 |
| C  | 2.41190500  | 0.99784400  | -1.85781800 |
| C  | 4.77378800  | 1.09106500  | -1.51158500 |
| H  | 5.38298900  | 0.45577500  | 0.46089800  |
| C  | 3.67792300  | 1.28365200  | -2.35351100 |

|   |             |             |             |
|---|-------------|-------------|-------------|
| H | 1.52981800  | 1.12472600  | -2.47450900 |
| H | 5.78185100  | 1.30615600  | -1.85395400 |
| H | 3.79388600  | 1.64560900  | -3.36951900 |
| C | -0.68011200 | 2.89796300  | 0.86130200  |
| C | -1.12323800 | 4.21266400  | 0.65130500  |
| C | -1.31875800 | 4.68324000  | -0.64157700 |
| H | -1.31167200 | 4.85026100  | 1.50951300  |
| C | -0.65539100 | 2.53030400  | -1.43175300 |
| C | -1.08038500 | 3.82019700  | -1.71368000 |
| H | -1.65997000 | 5.70030400  | -0.81147400 |
| H | -0.48492700 | 1.81136500  | -2.22545200 |
| H | -1.22887600 | 4.13106300  | -2.74230300 |
| N | -0.44544500 | 2.07531100  | -0.17833000 |
| N | 0.75085700  | -2.06933900 | -0.20618800 |
| N | 2.19542000  | 0.54148500  | -0.60884700 |
| C | -0.52808800 | 0.93685300  | 2.60748300  |
| H | -0.46563500 | 0.85883400  | 3.70227900  |
| H | -1.49907600 | 0.53845100  | 2.30450300  |
| H | 0.50680700  | 2.84559700  | 2.62303600  |
| H | -1.20445700 | 2.90810600  | 2.90998600  |
| C | 2.99694500  | -0.21435200 | 1.58791200  |
| H | 2.78714500  | -1.28657600 | 1.49711900  |
| H | 3.91866100  | -0.12824400 | 2.17031300  |
| H | -0.13796700 | -1.21324200 | 3.61096600  |
| C | -0.63842500 | -2.25400200 | 1.77657300  |
| H | -1.48874200 | -1.68553600 | 1.37996200  |
| H | -1.03819200 | -3.02953600 | 2.43688000  |
| O | -1.39441500 | -0.62477700 | -0.99070300 |
| C | -3.50566400 | -1.04795700 | -1.98914700 |
| C | -2.67731500 | -0.06173500 | -1.20061300 |
| C | -3.34142200 | 0.31224600  | 0.10221600  |
| C | -4.48260900 | -0.29183600 | 0.55951300  |
| C | -5.15475200 | -1.27093800 | -0.21944300 |
| C | -4.64559500 | -1.62454900 | -1.49923000 |
| H | -3.10997600 | -1.33434300 | -2.96149700 |
| H | -2.58378700 | 0.86439300  | -1.80573000 |
| H | -2.84179600 | 1.07251000  | 0.69341800  |
| H | -4.89065400 | -0.01791000 | 1.53108000  |
| H | -6.05613000 | -1.74474900 | 0.15869300  |
| H | -5.17516800 | -2.37056600 | -2.08925300 |

94

E (SMD/B3LYP-D3/BS1) = -1279.85203632 au

G (SMD/B3LYP-D3/BS1) = -1279.480097 au

E (SMD/B3LYP-D3/BS2//SMD/B3LYP-D3/BS1) = -2617.69109016 au

charge = 1 spin multiplicity = 4

|    |             |             |             |
|----|-------------|-------------|-------------|
| Ni | -0.02019300 | -0.36969900 | -0.58155800 |
|----|-------------|-------------|-------------|

|   |             |             |             |
|---|-------------|-------------|-------------|
| N | 0.08337300  | -1.29735500 | 1.38125400  |
| C | 1.36063300  | -2.07467700 | 1.55110200  |
| H | 2.07222900  | -1.45916200 | 2.10295000  |
| C | -0.02993700 | -0.30229500 | 2.48375100  |
| H | 0.15942400  | -0.80485500 | 3.44244100  |
| H | -1.05272500 | 0.07303000  | 2.50534400  |
| C | -2.47267100 | -1.75333100 | 1.46221700  |
| C | 2.81149400  | -1.40724100 | -0.39428400 |
| C | 4.18892900  | -1.48168600 | -0.61748900 |
| C | 4.85472400  | -0.38451200 | -1.16263700 |
| H | 4.72444700  | -2.39037700 | -0.36186300 |
| C | 2.76126800  | 0.77172700  | -1.21646100 |
| C | 4.12937000  | 0.76855500  | -1.46762200 |
| H | 5.92466000  | -0.42817300 | -1.34472600 |
| H | 2.14329000  | 1.63685000  | -1.43497100 |
| H | 4.60667100  | 1.64562800  | -1.89176300 |
| C | 0.40081400  | 1.97610900  | 1.40864100  |
| C | 0.42774200  | 3.32219800  | 1.78992700  |
| C | -0.51495300 | 2.55948300  | -0.64886100 |
| C | -0.02834500 | 4.30182300  | 0.91199700  |
| H | 0.80683500  | 3.58760200  | 2.77162800  |
| C | -0.51082900 | 3.91356700  | -0.33839400 |
| H | -0.87425300 | 2.20788500  | -1.60918900 |
| H | -0.00928700 | 5.34905700  | 1.19920200  |
| H | -0.87599600 | 4.63664000  | -1.05983300 |
| C | -3.02740700 | -1.05031800 | 0.24722200  |
| C | -4.41946000 | -0.98408800 | 0.08272300  |
| C | -4.95876200 | -0.35003100 | -1.02966400 |
| H | -5.06190500 | -1.43867500 | 0.83068800  |
| C | -2.72508700 | 0.09096100  | -1.75303800 |
| C | -4.08972300 | 0.19462900  | -1.97840900 |
| H | -6.03509600 | -0.29276600 | -1.16367500 |
| H | -2.00532400 | 0.47731400  | -2.46531700 |
| H | -4.45655400 | 0.68411700  | -2.87440500 |
| N | -2.19801100 | -0.49879200 | -0.65722200 |
| N | 2.12267600  | -0.28690700 | -0.69300000 |
| N | -0.07327700 | 1.60910800  | 0.19832300  |
| C | -1.04041900 | -2.28798500 | 1.42092300  |
| H | -0.91771600 | -2.91138000 | 2.31770300  |
| H | -0.91387200 | -2.93573500 | 0.54772000  |
| H | -2.62598900 | -1.11393100 | 2.33951200  |
| H | -3.10489400 | -2.63009800 | 1.64593100  |
| C | 0.91424600  | 0.90046400  | 2.33212600  |
| H | 1.90026700  | 0.57697000  | 1.97796600  |
| H | 1.07016100  | 1.33781500  | 3.32247200  |
| H | 1.15167400  | -2.95058400 | 2.17591100  |
| C | 2.02511000  | -2.52588200 | 0.23957700  |

|   |            |             |             |
|---|------------|-------------|-------------|
| H | 1.26504300 | -2.89399500 | -0.46060700 |
| H | 2.69555100 | -3.36131900 | 0.46171600  |
| O | 0.01187800 | -1.01468500 | -2.27959900 |

**<sup>q</sup>TS<sub>4-3</sub>**

E (SMD/B3LYP-D3/BS1) = -1512.09654184 au

G (SMD/B3LYP-D3/BS1) = -1511.631021 au

E (SMD/B3LYP-D3/BS2//SMD/B3LYP-D3/BS1) = -2850.02493713 au

negative eigenvalue of the frequency: 537i

charge = 1      spin multiplicity = 4

|    |             |             |             |
|----|-------------|-------------|-------------|
| Ni | -0.14567300 | -0.00522400 | -0.15918300 |
| N  | -0.36656500 | 0.02845900  | 1.98391700  |
| C  | -0.16032400 | 1.41382400  | 2.53333800  |
| H  | -1.13726600 | 1.87064400  | 2.69675400  |
| C  | -1.69598500 | -0.48209100 | 2.41963600  |
| H  | -1.79599500 | -0.34006300 | 3.50496900  |
| H  | -1.73208600 | -1.55380900 | 2.22316600  |
| C  | 0.66886400  | -2.33131500 | 2.27018300  |
| C  | -0.15866900 | 2.94490800  | 0.53334000  |
| C  | -0.28901500 | 4.32403400  | 0.34851700  |
| C  | -1.10176200 | 4.80457300  | -0.67800000 |
| H  | 0.24167400  | 5.00555300  | 1.00595700  |
| C  | -1.60135800 | 2.53497200  | -1.24416000 |
| C  | -1.77592900 | 3.89341900  | -1.49244900 |
| H  | -1.21002600 | 5.87376800  | -0.83695600 |
| H  | -2.09771200 | 1.78031100  | -1.84648400 |
| H  | -2.42085700 | 4.22132100  | -2.30113200 |
| C  | -3.19664500 | -0.40269100 | 0.34403100  |
| C  | -4.51498900 | -0.71052300 | -0.01196500 |
| C  | -2.45826300 | -1.05479300 | -1.76035500 |
| C  | -4.79529200 | -1.19696600 | -1.28592300 |
| H  | -5.30851700 | -0.56203500 | 0.71336900  |
| C  | -3.74299000 | -1.36965200 | -2.18560300 |
| H  | -1.61029200 | -1.16402400 | -2.42618900 |
| H  | -5.81567000 | -1.43570600 | -1.57144100 |
| H  | -3.90604600 | -1.73798700 | -3.19286500 |
| C  | 0.74492300  | -2.86016800 | 0.85730000  |
| C  | 1.10514100  | -4.20301800 | 0.66450600  |
| C  | 1.19292200  | -4.72288700 | -0.62061800 |
| H  | 1.31987000  | -4.82110500 | 1.53093000  |
| C  | 0.58410700  | -2.56420900 | -1.43914000 |
| C  | 0.93116800  | -3.88030100 | -1.70406500 |
| H  | 1.47160100  | -5.76087800 | -0.77746200 |
| H  | 0.39601800  | -1.86313200 | -2.24422000 |
| H  | 1.00014100  | -4.22849800 | -2.72914000 |
| N  | 0.47710800  | -2.05983000 | -0.19114900 |
| N  | -0.81466700 | 2.07417600  | -0.26065000 |

|   |             |             |             |
|---|-------------|-------------|-------------|
| N | -2.18130500 | -0.58787100 | -0.52712900 |
| C | 0.73928200  | -0.82431400 | 2.52116300  |
| H | 0.77493600  | -0.69843700 | 3.61285800  |
| H | 1.66747500  | -0.41867700 | 2.11201500  |
| H | -0.21871800 | -2.75920600 | 2.75112500  |
| H | 1.51555700  | -2.75784300 | 2.82132900  |
| C | -2.88425600 | 0.17406800  | 1.70192100  |
| H | -2.72051300 | 1.25225600  | 1.58852100  |
| H | -3.76772100 | 0.06173700  | 2.33703100  |
| H | 0.31437400  | 1.32669500  | 3.51762900  |
| C | 0.67214000  | 2.34780100  | 1.64007700  |
| H | 1.51699000  | 1.80290200  | 1.20238700  |
| H | 1.07817600  | 3.15035800  | 2.26345900  |
| O | 1.29501600  | 0.71498900  | -1.08735300 |
| C | 3.68839700  | 0.91950900  | -2.06921200 |
| C | 2.97111600  | -0.12401900 | -1.39505800 |
| C | 3.38913000  | -0.45428400 | -0.06739800 |
| C | 4.27966300  | 0.36189000  | 0.61935800  |
| C | 4.86552000  | 1.46431500  | -0.02214700 |
| C | 4.57877300  | 1.72164800  | -1.37922900 |
| H | 3.47132600  | 1.11144300  | -3.11668400 |
| H | 2.52958400  | -0.90738200 | -1.99929900 |
| H | 2.96089100  | -1.32449100 | 0.41555300  |
| H | 4.54220500  | 0.13250800  | 1.64949500  |
| H | 5.56657100  | 2.09841400  | 0.51423500  |
| H | 5.07673900  | 2.54481300  | -1.88617400 |

¶5

E (SMD/B3LYP-D3/BS1) = -1587.26009201 au

G (SMD/B3LYP-D3/BS1) = -1586.792959 au

E (SMD/B3LYP-D3/BS2//SMD/B3LYP-D3/BS1) = -2925.22177051 au

charge = 1 spin multiplicity = 4

|    |             |             |             |
|----|-------------|-------------|-------------|
| O  | 1.91348800  | 1.54526600  | -0.89077800 |
| Ni | -0.38134300 | -0.04178700 | -0.22580500 |
| N  | -1.83745000 | -0.60027200 | -1.64597300 |
| C  | -1.45345700 | -1.84824500 | -2.38772000 |
| H  | -1.85817100 | -2.70633000 | -1.85122600 |
| C  | -3.16607700 | -0.79510300 | -0.99747600 |
| H  | -3.88277100 | -1.13265900 | -1.75925400 |
| H  | -3.50535800 | 0.17235600  | -0.62731100 |
| C  | -2.41253500 | 1.87757700  | -2.15343200 |
| C  | 0.73739300  | -2.62143100 | -1.34980100 |
| C  | 1.55848100  | -3.75159000 | -1.40782700 |
| C  | 2.16939600  | -4.22152000 | -0.24571900 |
| H  | 1.71336400  | -4.25136900 | -2.35874100 |
| C  | 1.09931500  | -2.44667300 | 0.94416200  |
| C  | 1.93430100  | -3.55883600 | 0.95944400  |

|   |             |             |             |
|---|-------------|-------------|-------------|
| H | 2.81495400  | -5.09440600 | -0.28035500 |
| H | 0.88318600  | -1.88985000 | 1.85020700  |
| H | 2.38460700  | -3.88915400 | 1.88952000  |
| C | -2.68879900 | -1.24148900 | 1.49964900  |
| C | -3.39593800 | -1.50298100 | 2.67944500  |
| C | -1.05404900 | -0.11734600 | 2.71185000  |
| C | -2.89948700 | -1.05584300 | 3.90101600  |
| H | -4.32648000 | -2.05914500 | 2.62854800  |
| C | -1.69507400 | -0.35147300 | 3.92156700  |
| H | -0.11204100 | 0.41969100  | 2.67303900  |
| H | -3.44126700 | -1.25630400 | 4.82079300  |
| H | -1.25941500 | 0.01076300  | 4.84654400  |
| C | -1.64782600 | 2.65858400  | -1.10855500 |
| C | -1.70651900 | 4.05939000  | -1.13683900 |
| C | -1.06499000 | 4.80489700  | -0.15321000 |
| H | -2.25900600 | 4.55012800  | -1.93203200 |
| C | -0.33064600 | 2.74504000  | 0.80281000  |
| C | -0.36004800 | 4.13225700  | 0.84577800  |
| H | -1.10893900 | 5.89010800  | -0.16915800 |
| H | 0.22740800  | 2.18195600  | 1.54156600  |
| H | 0.16596200  | 4.66296200  | 1.63230300  |
| N | -0.96567300 | 2.01895000  | -0.13817200 |
| N | 0.52286000  | -1.98711400 | -0.17780000 |
| N | -1.53574200 | -0.54051600 | 1.52752000  |
| C | -1.87795300 | 0.52460200  | -2.63507900 |
| H | -2.51509500 | 0.21731000  | -3.47639600 |
| H | -0.85672100 | 0.64870800  | -3.00015200 |
| H | -3.45085300 | 1.78037500  | -1.81279200 |
| H | -2.47012000 | 2.50163800  | -3.05208800 |
| C | -3.17681100 | -1.78380000 | 0.17860000  |
| H | -2.58960800 | -2.67935800 | -0.05742300 |
| H | -4.20783200 | -2.12571300 | 0.30826700  |
| H | -1.94340800 | -1.82519800 | -3.36899200 |
| C | 0.05667600  | -2.06164000 | -2.57471100 |
| H | 0.54746400  | -1.12008900 | -2.84364600 |
| H | 0.19772200  | -2.75619600 | -3.40853500 |
| O | 1.08381900  | 0.49684500  | -1.47661000 |
| C | 3.32327900  | 2.11920400  | 0.92383900  |
| C | 2.64171100  | 0.98198500  | 0.22363400  |
| C | 3.57665800  | -0.11578400 | -0.19450400 |
| C | 4.91134200  | -0.08467900 | 0.10412000  |
| C | 5.48161400  | 1.00584000  | 0.81432300  |
| C | 4.66310500  | 2.10033700  | 1.20128800  |
| H | 2.69788100  | 2.96117100  | 1.20785500  |
| H | 1.87607900  | 0.55508600  | 0.90857200  |
| H | 3.13460900  | -0.93209500 | -0.75505000 |
| H | 5.55662900  | -0.90037700 | -0.21630300 |

|   |            |            |            |
|---|------------|------------|------------|
| H | 6.54367400 | 1.01456400 | 1.04025100 |
| H | 5.11635000 | 2.93957400 | 1.72470500 |

<sup>d</sup>6

E (SMD/B3LYP-D3/BS1) = -1204.66841693 au

G (SMD/B3LYP-D3/BS1) = -1204.300702 au

E (SMD/B3LYP-D3/BS2//SMD/B3LYP-D3/BS1) = -2542.48175388 au

charge = 1 spin multiplicity = 2

|    |             |             |             |
|----|-------------|-------------|-------------|
| Ni | 0.00392000  | 0.00214300  | -0.21426800 |
| N  | 0.00094700  | 0.00877100  | 1.88542000  |
| C  | -0.46932900 | -1.31249800 | 2.39691800  |
| H  | 0.36836600  | -2.01196900 | 2.35104300  |
| C  | 1.38047800  | 0.26461900  | 2.39462300  |
| H  | 1.42591900  | -0.02336800 | 3.45469800  |
| H  | 1.56599400  | 1.33991700  | 2.34467100  |
| C  | -0.83346800 | 2.39650000  | 1.60170500  |
| C  | -1.25600100 | -2.62877000 | 0.35189400  |
| C  | -1.60702500 | -3.96180700 | 0.12307500  |
| C  | -1.23462600 | -4.58345500 | -1.06844400 |
| H  | -2.17336100 | -4.49956000 | 0.87709400  |
| C  | -0.17918200 | -2.53377300 | -1.70981800 |
| C  | -0.50654600 | -3.85095000 | -2.00825100 |
| H  | -1.50601700 | -5.61779200 | -1.25852700 |
| H  | 0.39840600  | -1.92495600 | -2.39985600 |
| H  | -0.19127200 | -4.28779900 | -2.95030100 |
| C  | 2.91143600  | 0.23222200  | 0.34672600  |
| C  | 4.24024800  | 0.59742100  | 0.11558300  |
| C  | 2.28888400  | 1.09724300  | -1.72300200 |
| C  | 4.59094400  | 1.22168900  | -1.08110700 |
| H  | 4.98941300  | 0.38482400  | 0.87200200  |
| C  | 3.59218200  | 1.47392400  | -2.02390600 |
| H  | 1.47286400  | 1.28387400  | -2.41563000 |
| H  | 5.62148400  | 1.50577400  | -1.27312200 |
| H  | 3.81179500  | 1.95752600  | -2.97021200 |
| C  | -1.65764500 | 2.40239900  | 0.33947400  |
| C  | -2.64543700 | 3.36306000  | 0.10747800  |
| C  | -3.36915500 | 3.34131800  | -1.08439500 |
| H  | -2.83571600 | 4.12245600  | 0.85957100  |
| C  | -2.10331800 | 1.41244000  | -1.71987100 |
| C  | -3.08867700 | 2.34471300  | -2.02150500 |
| H  | -4.13597300 | 4.08593900  | -1.27709100 |
| H  | -1.85681700 | 0.60846500  | -2.40788600 |
| H  | -3.62325300 | 2.28277400  | -2.96387000 |
| N  | -1.39655600 | 1.43180300  | -0.56940600 |
| N  | -0.54176400 | -1.92563800 | -0.56006900 |
| N  | 1.94471300  | 0.48843300  | -0.56773800 |
| C  | -0.90944800 | 1.07768000  | 2.39255600  |



|   |             |             |            |
|---|-------------|-------------|------------|
| H | -0.67788500 | 1.26794000  | 3.45031000 |
| H | -1.93337000 | 0.69960100  | 2.35015100 |
| H | 0.21105300  | 2.61123300  | 1.34051300 |
| H | -1.17313100 | 3.20774400  | 2.25267200 |
| C | 2.48738000  | -0.46663600 | 1.61352300 |
| H | 2.15280000  | -1.48104400 | 1.35982000 |
| H | 3.35675000  | -0.57232200 | 2.26948700 |
| H | -0.74397800 | -1.20514900 | 3.45605900 |
| C | -1.65452200 | -1.90560000 | 1.61330100 |
| H | -2.36133400 | -1.10735000 | 1.35159800 |
| H | -2.18689200 | -2.60077500 | 2.26952800 |

qnt7

E (SMD/B3LYP-D3/BS1) = -2792.00033919 au

G (SMD/B3LYP-D3/BS1) = -2791.133698 au

E (SMD/B3LYP-D3/BS2//SMD/B3LYP-D3/BS1) = -5467.75658563 au

charge = 2 spin multiplicity = 3

|    |            |             |             |
|----|------------|-------------|-------------|
| Ni | 2.06689300 | 0.37460500  | -0.28673900 |
| N  | 3.86045300 | 0.85674000  | -1.39421200 |
| C  | 4.06081600 | 2.33253600  | -1.56966300 |
| H  | 4.63375200 | 2.71175000  | -0.72316200 |
| C  | 5.04670400 | 0.26698500  | -0.71087600 |
| H  | 5.96004100 | 0.60497100  | -1.21914200 |
| H  | 4.99449600 | -0.81724300 | -0.80735400 |
| C  | 3.78142500 | -1.21621400 | -2.93607800 |
| C  | 2.25061900 | 3.43481600  | -0.27984800 |
| C  | 2.15642900 | 4.73533900  | 0.22113300  |
| C  | 1.85076700 | 4.92806200  | 1.56784300  |
| H  | 2.34510200 | 5.57669600  | -0.43768000 |
| C  | 1.70872200 | 2.55104200  | 1.80394400  |
| C  | 1.63703600 | 3.81395200  | 2.38072100  |
| H  | 1.78530400 | 5.93193000  | 1.97716000  |
| H  | 1.50892900 | 1.65369900  | 2.37691700  |
| H  | 1.39422400 | 3.91519600  | 3.43272000  |
| C  | 4.27299300 | -0.22829000 | 1.70231700  |
| C  | 4.81247600 | -0.81452600 | 2.85204500  |
| C  | 2.14921800 | -1.02923700 | 2.26915700  |
| C  | 3.98583100 | -1.51945000 | 3.72370500  |
| H  | 5.87306400 | -0.70715700 | 3.05537000  |
| C  | 2.62548700 | -1.62122700 | 3.43250200  |
| H  | 1.09502600 | -1.06525900 | 1.99738900  |
| H  | 4.39721600 | -1.97739900 | 4.61864800  |
| H  | 1.93876400 | -2.15020800 | 4.08278700  |
| C  | 2.84045200 | -2.11879900 | -2.17877700 |
| C  | 2.79860200 | -3.47032200 | -2.55187300 |
| C  | 1.93803200 | -4.34103200 | -1.89983700 |
| H  | 3.44209000 | -3.81400000 | -3.35617100 |

|    |             |             |             |
|----|-------------|-------------|-------------|
| C  | 1.19453000  | -2.48206400 | -0.58138000 |
| C  | 1.11399900  | -3.83168200 | -0.89526100 |
| H  | 1.89649800  | -5.39054800 | -2.17694600 |
| H  | 0.52189000  | -2.03952100 | 0.15044900  |
| H  | 0.40978900  | -4.46155500 | -0.36820300 |
| N  | 2.05737000  | -1.63715800 | -1.19424200 |
| N  | 2.01388200  | 2.36715800  | 0.50910800  |
| N  | 2.95811900  | -0.35914000 | 1.42101500  |
| C  | 3.65025200  | 0.28985600  | -2.76661500 |
| H  | 4.38051500  | 0.74392900  | -3.44885500 |
| H  | 2.65568000  | 0.61323300  | -3.09058700 |
| H  | 4.81169100  | -1.53771400 | -2.74399000 |
| H  | 3.62530000  | -1.40571100 | -4.00561600 |
| C  | 5.13671700  | 0.60658900  | 0.78630600  |
| H  | 4.89436400  | 1.66209700  | 0.95964700  |
| H  | 6.17931300  | 0.47924400  | 1.09092400  |
| H  | 4.67077200  | 2.49615200  | -2.46575400 |
| C  | 2.74523400  | 3.12754700  | -1.66681700 |
| H  | 1.99582100  | 2.55485000  | -2.22569900 |
| H  | 2.92347200  | 4.05697700  | -2.21395500 |
| O  | 0.14200800  | 0.39677000  | 0.03179100  |
| Ni | -1.89966000 | 0.01318300  | 0.02281300  |
| N  | -4.08205000 | -0.37213900 | -0.04104000 |
| C  | -4.83187900 | 0.08193700  | 1.17672600  |
| H  | -5.25992300 | 1.06542200  | 0.98369000  |
| C  | -4.70878800 | 0.22654500  | -1.25309900 |
| H  | -5.77691900 | -0.03638700 | -1.26515900 |
| H  | -4.24809400 | -0.22696300 | -2.13101900 |
| C  | -3.85713300 | -2.58189700 | -1.38814700 |
| C  | -3.15970100 | 1.42038800  | 2.47995800  |
| C  | -3.38032900 | 2.43442400  | 3.41776400  |
| C  | -2.64655800 | 3.61611900  | 3.33847000  |
| H  | -4.13107100 | 2.29313500  | 4.18884400  |
| C  | -1.52408200 | 2.69013800  | 1.43908400  |
| C  | -1.70086400 | 3.75048600  | 2.32270600  |
| H  | -2.81195400 | 4.41694600  | 4.05360900  |
| H  | -0.78722700 | 2.73483500  | 0.64847500  |
| H  | -1.10069200 | 4.64681500  | 2.21722000  |
| C  | -3.26813800 | 2.25519700  | -1.94122000 |
| C  | -3.27803800 | 3.30611500  | -2.87009600 |
| C  | -0.95592600 | 2.23991900  | -1.95824400 |
| C  | -2.07845200 | 3.83342200  | -3.33748400 |
| H  | -4.22872000 | 3.70401200  | -3.21072100 |
| C  | -0.88368500 | 3.29145100  | -2.86310000 |
| H  | -0.05832700 | 1.78605500  | -1.55594000 |
| H  | -2.07638500 | 4.65090900  | -4.05296600 |
| H  | 0.08304100  | 3.66763300  | -3.18088100 |

|   |             |             |             |
|---|-------------|-------------|-------------|
| C | -2.54777900 | -2.33532200 | -2.09931100 |
| C | -2.24275800 | -3.16716000 | -3.18938300 |
| C | -1.12507200 | -2.90987600 | -3.97221600 |
| H | -2.90414800 | -3.99722700 | -3.41890900 |
| C | -0.66571100 | -1.06356800 | -2.52907600 |
| C | -0.32540700 | -1.81374600 | -3.64526300 |
| H | -0.88521200 | -3.54464800 | -4.82042100 |
| H | -0.04370400 | -0.24658300 | -2.19852100 |
| H | 0.55885100  | -1.55901000 | -4.21928600 |
| N | -1.74516200 | -1.30944700 | -1.75723900 |
| N | -2.23565800 | 1.55421700  | 1.50562700  |
| N | -2.11127900 | 1.71968400  | -1.50128600 |
| C | -4.20002900 | -1.86390500 | -0.08507800 |
| H | -5.24223900 | -2.13851300 | 0.13324900  |
| H | -3.59077800 | -2.24734700 | 0.72691500  |
| H | -4.65208500 | -2.40239700 | -2.12334000 |
| H | -3.92348200 | -3.65312300 | -1.16025200 |
| C | -4.57138100 | 1.74938400  | -1.37677400 |
| H | -4.73068500 | 2.23957600  | -0.40887300 |
| H | -5.38277900 | 2.10014000  | -2.02195900 |
| H | -5.67644300 | -0.59841800 | 1.34047100  |
| C | -3.99111700 | 0.17001200  | 2.45708800  |
| H | -3.34192800 | -0.70210700 | 2.53933800  |
| H | -4.67080600 | 0.16581700  | 3.31465300  |
| O | -1.17725700 | -1.32252000 | 1.37738700  |
| C | -0.90896300 | -2.49743300 | 3.46123000  |
| C | -1.57479800 | -2.44389500 | 2.10621600  |
| C | -1.45185800 | -3.75813200 | 1.37170200  |
| C | -0.91122700 | -4.88244000 | 1.93864700  |
| C | -0.38034400 | -4.85993600 | 3.25550100  |
| C | -0.37715500 | -3.64367700 | 3.98981800  |
| H | -2.66599200 | -2.36614100 | 2.35224800  |
| H | -1.82712700 | -3.77501500 | 0.35209900  |
| H | -0.85969400 | -5.80724300 | 1.36604400  |
| H | 0.04947900  | -5.75936300 | 3.68661400  |
| H | 0.07514700  | -3.62657400 | 4.98002600  |
| H | -0.88846600 | -1.56067300 | 4.01386600  |

t<sub>8</sub>

E (SMD/B3LYP-D3/BS1) = -1204.55632694 au

G (SMD/B3LYP-D3/BS1) = -1204.182532 au

E (SMD/B3LYP-D3/BS2//SMD/B3LYP-D3/BS1) = -2542.36032864 au

charge = 2      spin multiplicity = 3

|    |             |             |             |
|----|-------------|-------------|-------------|
| Ni | -0.06750200 | -0.27767700 | -0.28429600 |
| N  | 0.04048400  | -0.82158900 | 1.70862300  |
| C  | 1.17866800  | -1.78628600 | 1.91720000  |
| H  | 2.05821800  | -1.21825500 | 2.22399800  |

|   |             |             |             |
|---|-------------|-------------|-------------|
| C | 0.24670900  | 0.37235600  | 2.58963400  |
| H | 0.57442000  | 0.01702900  | 3.57379000  |
| H | -0.71242200 | 0.87235000  | 2.72529800  |
| C | -2.52935100 | -0.75960400 | 1.73555900  |
| C | 2.37686500  | -1.82910500 | -0.30070200 |
| C | 3.66500300  | -2.20938100 | -0.67647100 |
| C | 4.39559500  | -1.39587600 | -1.54234600 |
| H | 4.08475800  | -3.13057700 | -0.28674100 |
| C | 2.54127000  | 0.11326400  | -1.60039600 |
| C | 3.82693900  | -0.21064100 | -2.01294400 |
| H | 5.39973600  | -1.68106800 | -1.84155700 |
| H | 2.04254800  | 1.02031500  | -1.92585300 |
| H | 4.36335200  | 0.45099700  | -2.68409600 |
| C | 0.69776300  | 2.29150400  | 0.97188500  |
| C | 0.82274900  | 3.68063700  | 1.05033200  |
| C | -0.45934600 | 2.49573300  | -1.05146500 |
| C | 0.29514300  | 4.48256000  | 0.04065200  |
| H | 1.33261400  | 4.11900100  | 1.90165200  |
| C | -0.36038100 | 3.88014100  | -1.03436700 |
| H | -0.95991400 | 1.97128400  | -1.85867500 |
| H | 0.39140600  | 5.56282800  | 0.09392800  |
| H | -0.78833400 | 4.46362500  | -1.84205300 |
| C | -2.95960600 | -0.80357700 | 0.29303200  |
| C | -4.28759100 | -1.04889200 | -0.06689100 |
| C | -4.65373000 | -1.04533100 | -1.41067600 |
| H | -5.02085900 | -1.23861800 | 0.70969700  |
| C | -2.37858400 | -0.57480800 | -1.96235300 |
| C | -3.68019300 | -0.80394700 | -2.38240400 |
| H | -5.68443600 | -1.23203800 | -1.69688200 |
| H | -1.57654800 | -0.38426000 | -2.66951100 |
| H | -3.91845500 | -0.79548700 | -3.44021300 |
| N | -2.02848500 | -0.56985900 | -0.65697100 |
| N | 1.83861600  | -0.67943300 | -0.76853400 |
| N | 0.05821800  | 1.72354900  | -0.07493700 |
| C | -1.23741300 | -1.51893900 | 2.07119300  |
| H | -1.21575200 | -1.71775100 | 3.15005100  |
| H | -1.23507000 | -2.48156800 | 1.55292800  |
| H | -2.45116300 | 0.29110100  | 2.03942600  |
| H | -3.32641100 | -1.19188400 | 2.34700200  |
| C | 1.26180300  | 1.38243900  | 2.03423300  |
| H | 2.13797500  | 0.85959900  | 1.63073000  |
| H | 1.61884300  | 1.99647100  | 2.86538800  |
| H | 0.91412800  | -2.44941100 | 2.74744300  |
| C | 1.53585000  | -2.61596400 | 0.67292900  |
| H | 0.62121200  | -2.97299600 | 0.17866000  |
| H | 2.08940300  | -3.50211100 | 0.99481000  |

t9

E (SMD/B3LYP-D3/BS1) = -1356.11360075 au

G (SMD/B3LYP-D3/BS1) = -1355.714878 au

E (SMD/B3LYP-D3/BS2//SMD/B3LYP-D3/BS1) = -2693.99578829 au

charge = 2 spin multiplicity = 3

|    |             |             |             |
|----|-------------|-------------|-------------|
| Ni | -0.03379800 | -0.24803900 | -0.21948300 |
| N  | 0.05046000  | -0.61165100 | 1.83445900  |
| C  | 1.35715300  | -1.23554900 | 2.25202700  |
| H  | 2.03230200  | -0.44114000 | 2.57010800  |
| C  | -0.13554500 | 0.66314100  | 2.59438400  |
| H  | 0.04368300  | 0.45814900  | 3.65730200  |
| H  | -1.17264800 | 0.97865300  | 2.48671300  |
| C  | -2.48488600 | -1.13725100 | 1.90722000  |
| C  | 2.73617200  | -1.20698200 | 0.13019600  |
| C  | 4.10185200  | -1.31421200 | -0.13932900 |
| C  | 4.68524400  | -0.47978800 | -1.09108500 |
| H  | 4.69348500  | -2.04799300 | 0.39800800  |
| C  | 2.54145200  | 0.52043500  | -1.43255000 |
| C  | 3.89131900  | 0.45845000  | -1.75270100 |
| H  | 5.74613200  | -0.55742800 | -1.30986700 |
| H  | 1.87519500  | 1.23409700  | -1.90568000 |
| H  | 4.30340200  | 1.13067000  | -2.49734900 |
| C  | 0.25646800  | 2.54777600  | 0.91517400  |
| C  | 0.21825000  | 3.94479800  | 0.87955300  |
| C  | -0.59947100 | 2.45417500  | -1.25189800 |
| C  | -0.23598900 | 4.59811100  | -0.26309200 |
| H  | 0.54597400  | 4.50547400  | 1.74873500  |
| C  | -0.65354300 | 3.83729200  | -1.35577600 |
| H  | -0.91170300 | 1.81877900  | -2.07214800 |
| H  | -0.26660000 | 5.68298700  | -0.29933400 |
| H  | -1.01529300 | 4.29779300  | -2.26855700 |
| C  | -2.94571200 | -0.92657000 | 0.48632100  |
| C  | -4.30501100 | -1.07195100 | 0.17944400  |
| C  | -4.75263400 | -0.87327300 | -1.12106100 |
| H  | -4.99627600 | -1.34655200 | 0.96954100  |
| C  | -2.49507200 | -0.41880400 | -1.74606400 |
| C  | -3.82453800 | -0.54488900 | -2.11247200 |
| H  | -5.80552800 | -0.98411100 | -1.36244200 |
| H  | -1.73220500 | -0.18500100 | -2.48109800 |
| H  | -4.11868400 | -0.39564100 | -3.14551200 |
| N  | -2.06110800 | -0.58767300 | -0.47473700 |
| N  | 1.97989800  | -0.29276900 | -0.51824400 |
| N  | -0.15655400 | 1.82158900  | -0.14673800 |
| C  | -1.04364800 | -1.58756500 | 2.15442200  |
| H  | -0.96527700 | -1.84490200 | 3.21854200  |
| H  | -0.83585000 | -2.49536200 | 1.57978400  |
| H  | -2.71706800 | -0.23440400 | 2.48386000  |

|   |             |             |             |
|---|-------------|-------------|-------------|
| H | -3.11640900 | -1.91897300 | 2.34377500  |
| C | 0.76945400  | 1.81158600  | 2.12552200  |
| H | 1.78240400  | 1.45048600  | 1.91089700  |
| H | 0.86494100  | 2.52252500  | 2.95062400  |
| H | 1.16565200  | -1.86434100 | 3.12797800  |
| C | 2.05144400  | -2.06325500 | 1.16493200  |
| H | 1.33504500  | -2.73485300 | 0.68195100  |
| H | 2.79820500  | -2.69712000 | 1.65109400  |
| O | -0.09212600 | -2.19199000 | -1.37726800 |
| O | 1.04022900  | -3.03687500 | -1.69310200 |
| H | 1.10790900  | -2.87897600 | -2.65791800 |
| H | -0.76468600 | -2.83732200 | -1.07272400 |

**TS<sub>9-10</sub>**

E (SMD/B3LYP-D3/BS1) = -1356.07244117 au

G (SMD/B3LYP-D3/BS1) = -1355.673983 au

E (SMD/B3LYP-D3/BS2//SMD/B3LYP-D3/BS1) = -2693.95187452 au

negative eigenvalue of the frequency: 906i

charge = 2 spin multiplicity = 3

|    |             |             |             |
|----|-------------|-------------|-------------|
| Ni | 0.07086900  | -0.31145400 | -0.40420100 |
| N  | 0.00968000  | -1.25605300 | 1.38702300  |
| C  | 1.36620600  | -1.73619800 | 1.82064400  |
| H  | 1.90065400  | -0.89791200 | 2.26282600  |
| C  | -0.57603400 | -0.35537800 | 2.42868000  |
| H  | -0.59154900 | -0.91289500 | 3.37298300  |
| H  | -1.60428200 | -0.13760900 | 2.14457100  |
| C  | -2.35382700 | -2.25179600 | 1.08729300  |
| C  | 2.93361200  | -1.24095900 | -0.06157200 |
| C  | 4.31422800  | -1.25585000 | -0.27264500 |
| C  | 4.92407100  | -0.18201000 | -0.91592800 |
| H  | 4.89353300  | -2.10396700 | 0.07665200  |
| C  | 2.77090900  | 0.84449800  | -1.08605900 |
| C  | 4.13787000  | 0.89641800  | -1.32364700 |
| H  | 5.99628300  | -0.18132600 | -1.08709500 |
| H  | 2.12484500  | 1.66008800  | -1.38889100 |
| H  | 4.56647500  | 1.76270500  | -1.81539600 |
| C  | -0.05679000 | 2.00938200  | 1.56399200  |
| C  | -0.18895200 | 3.35783000  | 1.91498400  |
| C  | -0.20100900 | 2.57606400  | -0.69096800 |
| C  | -0.32554800 | 4.32659200  | 0.92644500  |
| H  | -0.17884500 | 3.63215100  | 2.96459600  |
| C  | -0.32551900 | 3.92824800  | -0.41079400 |
| H  | -0.18583800 | 2.22421300  | -1.71659600 |
| H  | -0.42826800 | 5.37392700  | 1.19374200  |
| H  | -0.42181800 | 4.64059400  | -1.22265000 |
| C  | -2.90169500 | -1.27765200 | 0.07501300  |
| C  | -4.28961700 | -1.23863000 | -0.11713300 |

|   |             |             |             |
|---|-------------|-------------|-------------|
| C | -4.84207500 | -0.34781000 | -1.02635900 |
| H | -4.91533300 | -1.91674500 | 0.45449400  |
| C | -2.62429100 | 0.40248700  | -1.50324400 |
| C | -3.98579900 | 0.49316900  | -1.74070700 |
| H | -5.91609200 | -0.31144900 | -1.18160400 |
| H | -1.93553800 | 1.02762800  | -2.05293000 |
| H | -4.35827400 | 1.20437400  | -2.46980500 |
| N | -2.08008800 | -0.45558200 | -0.60978200 |
| N | 2.17855100  | -0.20249000 | -0.47809500 |
| N | -0.07670800 | 1.63408200  | 0.26745700  |
| C | -0.85011600 | -2.46719200 | 1.14701900  |
| H | -0.65680800 | -3.17459600 | 1.96074600  |
| H | -0.49924200 | -2.93905900 | 0.22534900  |
| H | -2.74334200 | -1.98001900 | 2.07510400  |
| H | -2.78477700 | -3.23703300 | 0.87231600  |
| C | 0.15565500  | 0.97087700  | 2.63528400  |
| H | 1.23347800  | 0.82179100  | 2.76584700  |
| H | -0.20278600 | 1.38030800  | 3.58400000  |
| H | 1.20698000  | -2.47968700 | 2.60825800  |
| C | 2.22882400  | -2.32927000 | 0.69983100  |
| H | 1.63710100  | -2.95049300 | 0.01892100  |
| H | 2.97228300  | -2.98630300 | 1.15796100  |
| O | 0.09041500  | -0.10583100 | -2.38548800 |
| O | 0.22299200  | -1.82123000 | -1.80487300 |
| H | -0.69054700 | -2.04199400 | -2.09564600 |
| H | 1.00946100  | -0.11612700 | -2.73424100 |

**°10**

E (SMD/B3LYP-D3/BS1) = -1356.09190265 au

G (SMD/B3LYP-D3/BS1) = -1355.687979 au

E (SMD/B3LYP-D3/BS2//SMD/B3LYP-D3/BS1) = -2693.98020860 au

charge = 2 spin multiplicity = 1

|    |             |             |             |
|----|-------------|-------------|-------------|
| Ni | -0.00487600 | -0.32120700 | -0.48144400 |
| N  | -0.14233000 | -1.24471800 | 1.36271900  |
| C  | 1.19840000  | -1.67528700 | 1.87238100  |
| H  | 1.73977000  | -0.79438100 | 2.20980900  |
| C  | -0.79834200 | -0.34901500 | 2.36753600  |
| H  | -0.94043200 | -0.94257500 | 3.27816900  |
| H  | -1.78107500 | -0.07374300 | 1.98818200  |
| C  | -2.43625800 | -2.25171100 | 0.86079700  |
| C  | 2.71936900  | -1.41384200 | -0.06474100 |
| C  | 4.08872000  | -1.50280700 | -0.32972100 |
| C  | 4.72188500  | -0.53569500 | -1.09995700 |
| H  | 4.63966000  | -2.33726400 | 0.09041900  |
| C  | 2.60553300  | 0.55841500  | -1.31666200 |
| C  | 3.96372600  | 0.52645700  | -1.58862000 |
| H  | 5.78542600  | -0.60384400 | -1.30651800 |

|   |             |             |             |
|---|-------------|-------------|-------------|
| H | 1.99122300  | 1.34564100  | -1.71652500 |
| H | 4.40026300  | 1.32229200  | -2.18150300 |
| C | 0.10024300  | 1.93412800  | 1.62597500  |
| C | 0.24202100  | 3.27320700  | 2.01607300  |
| C | 0.19271600  | 2.59057500  | -0.60509100 |
| C | 0.36709400  | 4.28125100  | 1.07244300  |
| H | 0.24435900  | 3.49935800  | 3.07728300  |
| C | 0.33228100  | 3.92722100  | -0.27519200 |
| H | 0.15241100  | 2.27922800  | -1.63965700 |
| H | 0.47671200  | 5.31681000  | 1.37908600  |
| H | 0.40802400  | 4.66254200  | -1.06847700 |
| C | -2.83522700 | -1.18458800 | -0.12568400 |
| C | -4.19441500 | -1.13904200 | -0.47177500 |
| C | -4.70535400 | -0.09055700 | -1.21878100 |
| H | -4.83704300 | -1.93619900 | -0.11274800 |
| C | -2.50048900 | 0.82682900  | -1.27140600 |
| C | -3.83799200 | 0.93213900  | -1.60395200 |
| H | -5.75778300 | -0.06157800 | -1.48301600 |
| H | -1.79941200 | 1.57548700  | -1.59509800 |
| H | -4.17467600 | 1.79466800  | -2.16801500 |
| N | -2.00083100 | -0.21706000 | -0.56565000 |
| N | 1.99506200  | -0.38812100 | -0.57274900 |
| N | 0.09073600  | 1.59998500  | 0.31400300  |
| C | -0.97358400 | -2.48131200 | 1.19257000  |
| H | -0.92975700 | -3.02706200 | 2.14134400  |
| H | -0.50613600 | -3.08517000 | 0.42443700  |
| H | -2.99270800 | -2.02067500 | 1.77792800  |
| H | -2.83665900 | -3.20885900 | 0.51068700  |
| C | -0.03497900 | 0.91102900  | 2.71872300  |
| H | 0.95768800  | 0.69426700  | 3.12716600  |
| H | -0.58576400 | 1.37960000  | 3.54048400  |
| H | 1.02063300  | -2.31498100 | 2.74277800  |
| C | 2.05798800  | -2.40202300 | 0.84586500  |
| H | 1.48951500  | -3.13422300 | 0.26853600  |
| H | 2.83491000  | -2.94891100 | 1.38504500  |
| O | -0.07680900 | -1.96128700 | -1.28502500 |
| O | 0.05155100  | 0.35241200  | -2.20049800 |
| H | -0.52584000 | -0.24221000 | -2.71588900 |
| H | 0.62680500  | -1.93624300 | -1.96224100 |

<sup>t</sup>TS<sub>9-11</sub>

E (SMD/B3LYP-D3/BS1) = -1588.35224231 au

G (SMD/B3LYP-D3/BS1) = -1587.860626 au

E (SMD/B3LYP-D3/BS2//SMD/B3LYP-D3/BS1) = -2926.31661574 au

negative eigenvalue of the frequency: 423i

charge = 2 spin multiplicity = 3

|    |            |            |             |
|----|------------|------------|-------------|
| Ni | 0.51458700 | 0.24481900 | -0.38336500 |
|----|------------|------------|-------------|



|   |             |             |             |
|---|-------------|-------------|-------------|
| N | 1.76841300  | 1.97097800  | -0.39430100 |
| C | 1.09168700  | 3.18637300  | -0.97505400 |
| H | 0.72318600  | 3.80174900  | -0.15362700 |
| C | 2.22621900  | 2.29120600  | 0.99012100  |
| H | 2.78651600  | 3.23500600  | 0.96563600  |
| H | 2.90983300  | 1.50813900  | 1.31676500  |
| C | 3.88667600  | 0.53270200  | -0.82484300 |
| C | -1.32767200 | 2.49591600  | -1.18889700 |
| C | -2.51600800 | 3.22452200  | -1.28727900 |
| C | -3.62787200 | 2.83895900  | -0.53969200 |
| H | -2.55760700 | 4.08770200  | -1.94359900 |
| C | -2.31464400 | 1.05720800  | 0.36095800  |
| C | -3.52678900 | 1.73444400  | 0.30673000  |
| H | -4.55693300 | 3.39660800  | -0.61260600 |
| H | -2.17712000 | 0.19137000  | 0.99779200  |
| H | -4.36279600 | 1.39790300  | 0.91001100  |
| C | 0.65613700  | 1.06151500  | 2.58779200  |
| C | 0.48388200  | 0.89140100  | 3.96541600  |
| C | 0.05407300  | -1.15723200 | 2.22284400  |
| C | 0.07608200  | -0.34179500 | 4.46761400  |
| H | 0.67369600  | 1.72726800  | 4.63077400  |
| C | -0.14227400 | -1.39349200 | 3.57712100  |
| H | -0.10354000 | -1.93807800 | 1.49148400  |
| H | -0.06240600 | -0.48113300 | 5.53573100  |
| H | -0.45576700 | -2.37509500 | 3.91588300  |
| C | 3.40985500  | -0.89806800 | -0.74474100 |
| C | 4.35529300  | -1.92927700 | -0.84707500 |
| C | 3.95205400  | -3.25680100 | -0.77253100 |
| H | 5.40040800  | -1.67355300 | -0.99062400 |
| C | 1.71153700  | -2.47310600 | -0.52295100 |
| C | 2.59304600  | -3.53854200 | -0.61421800 |
| H | 4.68071500  | -4.05839800 | -0.84994900 |
| H | 0.64569900  | -2.63603300 | -0.42579600 |
| H | 2.22079600  | -4.55629000 | -0.56818000 |
| N | 2.10381300  | -1.18000800 | -0.56744200 |
| N | -1.24737700 | 1.42031100  | -0.37257100 |
| N | 0.43690600  | 0.03790300  | 1.73364200  |
| C | 2.92026500  | 1.62493000  | -1.28885200 |
| H | 3.52340600  | 2.53061700  | -1.43558200 |
| H | 2.48813000  | 1.35260300  | -2.25639200 |
| H | 4.34208100  | 0.80064500  | 0.13577500  |
| H | 4.71561300  | 0.55738900  | -1.54152800 |
| C | 1.08506500  | 2.38873500  | 2.01618500  |
| H | 0.20802900  | 2.88131600  | 1.58004800  |
| H | 1.42053600  | 3.02832700  | 2.83724200  |
| H | 1.84876900  | 3.78004500  | -1.49877800 |
| C | -0.07677000 | 2.89841800  | -1.92795000 |

|   |             |             |             |
|---|-------------|-------------|-------------|
| H | 0.20100700  | 2.11818300  | -2.64312800 |
| H | -0.27815900 | 3.81173400  | -2.49545100 |
| O | 0.12317500  | -0.10072800 | -2.35700200 |
| C | -3.62507000 | -2.18166700 | -1.75911500 |
| C | -2.41720300 | -2.83973300 | -1.33792400 |
| C | -2.20646900 | -3.03933300 | 0.06816900  |
| C | -3.08544800 | -2.50906900 | 0.99343000  |
| C | -4.22612900 | -1.81708000 | 0.55023500  |
| C | -4.49142800 | -1.65113900 | -0.82288900 |
| H | -3.81676500 | -2.07505400 | -2.82239000 |
| H | -1.92946900 | -3.51553400 | -2.03148500 |
| H | -1.33290900 | -3.59884000 | 0.38647300  |
| H | -2.90341900 | -2.62989100 | 2.05633700  |
| H | -4.91470100 | -1.40019000 | 1.27942400  |
| H | -5.38206800 | -1.11793400 | -1.13915300 |
| H | 0.73559700  | -0.79036000 | -2.67743000 |
| O | -1.15602300 | -1.45655400 | -1.67217500 |
| H | -1.77685600 | -0.70116500 | -1.69696800 |

## 11

E (SMD/B3LYP-D3/BS1) = -307.851134765 au

G (SMD/B3LYP-D3/BS1) = -307.766028 au

E (SMD/B3LYP-D3/BS2//SMD/B3LYP-D3/BS1) = -307.979142371 au

charge = 1 spin multiplicity = 1

|   |             |             |             |
|---|-------------|-------------|-------------|
| C | 0.20268000  | -1.25778200 | 0.04733500  |
| C | 0.95537900  | -0.00000100 | 0.24180000  |
| C | 0.20268300  | 1.25778100  | 0.04733700  |
| C | -1.16658500 | 1.23975400  | -0.03529700 |
| C | -1.83919000 | 0.00000200  | -0.07967200 |
| C | -1.16658800 | -1.23975300 | -0.03529800 |
| H | 0.77110900  | -2.18283400 | 0.05910900  |
| H | 0.95127500  | -0.00000400 | 1.37184800  |
| H | 0.77111400  | 2.18283200  | 0.05911400  |
| H | -1.73163300 | 2.16248000  | -0.10847200 |
| H | -2.92196500 | 0.00000300  | -0.17120600 |
| H | -1.73163800 | -2.16247700 | -0.10847200 |
| O | 2.30331500  | -0.00000400 | -0.13828700 |
| H | 2.33494800  | 0.00002400  | -1.11285600 |

## 12

E (SMD/B3LYP-D3/BS1) = -1280.51983217 au

G (SMD/B3LYP-D3/BS1) = -1280.138808 au

E (SMD/B3LYP-D3/BS2//SMD/B3LYP-D3/BS1) = -2618.36599333 au

charge = 1 spin multiplicity = 3

|    |            |             |             |
|----|------------|-------------|-------------|
| Ni | 0.00343100 | -0.37682500 | -0.56220900 |
| N  | 0.06869900 | -1.28404900 | 1.38198300  |
| C  | 1.36451300 | -2.01683900 | 1.59585700  |

|   |             |             |             |
|---|-------------|-------------|-------------|
| H | 2.04391800  | -1.36707600 | 2.14872400  |
| C | -0.11939800 | -0.28472500 | 2.46989700  |
| H | 0.03311700  | -0.77677000 | 3.44065000  |
| H | -1.15007900 | 0.06807500  | 2.43643600  |
| C | -2.47294100 | -1.82212800 | 1.41423000  |
| C | 2.84205700  | -1.35297100 | -0.33514600 |
| C | 4.21888000  | -1.42412000 | -0.56514600 |
| C | 4.87797100  | -0.33094600 | -1.12621600 |
| H | 4.75984800  | -2.32756900 | -0.30204500 |
| C | 2.77898400  | 0.81472600  | -1.17738200 |
| C | 4.14577500  | 0.81543000  | -1.43853900 |
| H | 5.94720900  | -0.37227000 | -1.31344100 |
| H | 2.15938400  | 1.67772900  | -1.40018900 |
| H | 4.61644300  | 1.69054300  | -1.87422200 |
| C | 0.32785500  | 2.00135500  | 1.40157500  |
| C | 0.32147700  | 3.34992100  | 1.77591300  |
| C | -0.45606000 | 2.56723700  | -0.71319300 |
| C | -0.08285900 | 4.32178500  | 0.86462200  |
| H | 0.63559500  | 3.62375300  | 2.77805900  |
| C | -0.47809500 | 3.92351900  | -0.41293600 |
| H | -0.74647000 | 2.20801700  | -1.69381500 |
| H | -0.08916000 | 5.37070500  | 1.14621700  |
| H | -0.79670800 | 4.64021500  | -1.16223800 |
| C | -3.02082300 | -1.06344900 | 0.22930000  |
| C | -4.41242400 | -0.98977100 | 0.06148000  |
| C | -4.94618500 | -0.30595600 | -1.02363600 |
| H | -5.05870200 | -1.47786700 | 0.78471400  |
| C | -2.70934200 | 0.16640000  | -1.71382900 |
| C | -4.07243200 | 0.28200400  | -1.94220900 |
| H | -6.02180600 | -0.24260800 | -1.16060600 |
| H | -1.98924800 | 0.58656400  | -2.40707000 |
| H | -4.43458400 | 0.81249600  | -2.81653600 |
| N | -2.18628200 | -0.47262800 | -0.64490700 |
| N | 2.14493300  | -0.23987600 | -0.64210400 |
| N | -0.06822600 | 1.62361200  | 0.16693900  |
| C | -1.02376700 | -2.30991800 | 1.38447500  |
| H | -0.89729800 | -2.94623500 | 2.27152400  |
| H | -0.86171700 | -2.93713400 | 0.50272900  |
| H | -2.66856200 | -1.24247600 | 2.32413500  |
| H | -3.08085500 | -2.72779100 | 1.52847600  |
| C | 0.80452700  | 0.93813900  | 2.35921700  |
| H | 1.81559900  | 0.63439100  | 2.06250300  |
| H | 0.89669200  | 1.38318300  | 3.35416800  |
| H | 1.16855600  | -2.88487500 | 2.23590700  |
| C | 2.06616600  | -2.47482500 | 0.30605800  |
| H | 1.32883400  | -2.85860000 | -0.40861700 |
| H | 2.74855900  | -3.29276400 | 0.55581200  |

O 0.11104900 -1.40006600 -2.15292200  
H -0.78017400 -1.70863500 -2.38577700

qnt<sup>TS</sup><sub>9-13</sub>

E (SMD/B3LYP-D3/BS1) = -2560.65610907 au

G (SMD/B3LYP-D3/BS1) = -2559.851949 au

E (SMD/B3LYP-D3/BS2//SMD/B3LYP-D3/BS1) = -5236.33525414 au

negative eigenvalue of the frequency: 539i

charge = 4 spin multiplicity = 5

Ni -2.43010100 -0.33592300 -0.26783500  
N -3.92082200 -1.69504700 -0.87703900  
C -3.44449800 -3.12696000 -0.92245800  
H -3.77181400 -3.62954800 -0.01191200  
C -5.08895700 -1.61089100 0.05489700  
H -5.80015200 -2.40187300 -0.21369400  
H -5.58415200 -0.65282200 -0.09925500  
C -4.95210700 0.07548200 -2.47314200  
C -1.19115000 -2.99925500 0.21559700  
C -0.44366200 -3.96674700 0.89377600  
C 0.20852300 -3.63247500 2.07966000  
H -0.37601500 -4.96847500 0.48356100  
C -0.68511600 -1.42510400 1.86463300  
C 0.09300700 -2.33167000 2.57403200  
H 0.79933900 -4.37452900 2.60796400  
H -0.83618400 -0.41095000 2.21388300  
H 0.58463100 -2.02341200 3.49017200  
C -4.25850400 -0.43564400 2.16418900  
C -4.75811400 -0.00580500 3.39757000  
C -2.91914600 1.46844200 2.02730700  
C -4.30852300 1.19115000 3.94972800  
H -5.49680300 -0.61320200 3.91020500  
C -3.36698400 1.94765000 3.25023100  
H -2.18581500 2.01524600 1.44806900  
H -4.69090600 1.53083000 4.90757600  
H -2.98547700 2.88673300 3.63567800  
C -4.10733400 1.30642300 -2.26161300  
C -4.40065400 2.48140400 -2.96733700  
C -3.63885200 3.62654200 -2.76465800  
H -5.22476700 2.47978500 -3.67351400  
C -2.33425500 2.38878200 -1.19969100  
C -2.57392700 3.58159500 -1.86029700  
H -3.86382800 4.53800400 -3.31034300  
H -1.51277300 2.28573800 -0.50077600  
H -1.94154900 4.44246900 -1.67375700  
N -3.08562200 1.28032100 -1.38297300  
N -1.30663500 -1.74794800 0.71540200  
N -3.34785600 0.30520100 1.49656300

|    |             |             |             |
|----|-------------|-------------|-------------|
| C  | -4.31429700 | -1.30230900 | -2.27184100 |
| H  | -5.03679200 | -2.04129900 | -2.64083500 |
| H  | -3.41135200 | -1.38877500 | -2.88479800 |
| H  | -5.86048700 | 0.17409600  | -1.86758800 |
| H  | -5.30271400 | 0.08944900  | -3.51066600 |
| C  | -4.71481800 | -1.72955800 | 1.54085500  |
| H  | -3.93475700 | -2.48614900 | 1.68857000  |
| H  | -5.59460900 | -2.08563400 | 2.08350200  |
| H  | -3.94578700 | -3.62513400 | -1.75828900 |
| C  | -1.92820200 | -3.30950000 | -1.06081600 |
| H  | -1.54834100 | -2.68978400 | -1.87897600 |
| H  | -1.74346700 | -4.35292900 | -1.33140600 |
| O  | -0.98813400 | -0.48150000 | -1.93767700 |
| O  | 0.75224000  | -0.04475500 | -1.43682300 |
| H  | 1.04256600  | -0.68094900 | -2.11849500 |
| H  | -1.08156600 | 0.34443100  | -2.46170600 |
| Ni | 2.34450500  | 0.23568000  | -0.30442600 |
| N  | 3.49890500  | 1.59060600  | -1.45337800 |
| C  | 2.82608300  | 2.92994400  | -1.64385400 |
| H  | 3.29775800  | 3.64946600  | -0.97423800 |
| C  | 4.83200500  | 1.81345000  | -0.81617600 |
| H  | 5.34638800  | 2.60947500  | -1.36716100 |
| H  | 5.42264900  | 0.90415000  | -0.91514500 |
| C  | 4.43036900  | -0.35496500 | -2.86451600 |
| C  | 0.99193400  | 2.78787500  | 0.06626200  |
| C  | 0.34493800  | 3.79364200  | 0.78917000  |
| C  | 0.08413200  | 3.62111900  | 2.14611400  |
| H  | 0.05413600  | 4.70279900  | 0.27420300  |
| C  | 1.11766500  | 1.46995000  | 2.00130000  |
| C  | 0.47141100  | 2.43145900  | 2.76432000  |
| H  | -0.41728300 | 4.40082200  | 2.71090800  |
| H  | 1.44676300  | 0.53712200  | 2.43890500  |
| H  | 0.28078200  | 2.24291600  | 3.81469800  |
| C  | 4.57030400  | 0.96333900  | 1.55196700  |
| C  | 5.33550300  | 0.80171600  | 2.71101900  |
| C  | 3.47733800  | -1.05790600 | 1.99057700  |
| C  | 5.15212600  | -0.31365300 | 3.52186700  |
| H  | 6.06830600  | 1.56052100  | 2.96285600  |
| C  | 4.20100900  | -1.26596400 | 3.15397400  |
| H  | 2.71724800  | -1.76112600 | 1.68073600  |
| H  | 5.74189000  | -0.43894400 | 4.42466600  |
| H  | 4.01419200  | -2.15292100 | 3.74897700  |
| C  | 3.84399100  | -1.56302500 | -2.18594900 |
| C  | 4.22641400  | -2.84328400 | -2.60888800 |
| C  | 3.66119600  | -3.97411800 | -2.03465900 |
| H  | 4.96102900  | -2.92733300 | -3.40314200 |
| C  | 2.34821800  | -2.53297000 | -0.66345400 |

|   |            |             |             |
|---|------------|-------------|-------------|
| C | 2.68352400 | -3.81658100 | -1.04795200 |
| H | 3.95898100 | -4.96417800 | -2.36562900 |
| H | 1.58190000 | -2.34959400 | 0.07796700  |
| H | 2.18139100 | -4.66016000 | -0.58838200 |
| N | 2.93917100 | -1.43531300 | -1.19385900 |
| N | 1.37505700 | 1.64830200  | 0.68933500  |
| N | 3.65591500 | 0.02856200  | 1.20759500  |
| C | 3.65244000 | 0.95698200  | -2.80339400 |
| H | 4.17600900 | 1.66854700  | -3.45352400 |
| H | 2.64401700 | 0.82231800  | -3.20485900 |
| H | 5.46028600 | -0.22197400 | -2.51626300 |
| H | 4.52285900 | -0.59894100 | -3.92854600 |
| C | 4.74259800 | 2.16880800  | 0.66999200  |
| H | 3.92730100 | 2.87539900  | 0.86579400  |
| H | 5.66588300 | 2.67916500  | 0.95569100  |
| H | 3.02454300 | 3.26484900  | -2.66570000 |
| C | 1.31726300 | 2.94514700  | -1.39265700 |
| H | 0.82096600 | 2.16572000  | -1.97547300 |
| H | 0.93528600 | 3.90952900  | -1.73684500 |

**d<sup>13</sup>**

E (SMD/B3LYP-D3/BS1) = -1280.33021541 au

G (SMD/B3LYP-D3/BS1) = -1279.939910 au

E (SMD/B3LYP-D3/BS2//SMD/B3LYP-D3/BS1) = -2618.17772787 au

charge = 2      spin multiplicity = 2

|    |             |             |             |
|----|-------------|-------------|-------------|
| Ni | -0.02787300 | -0.34945800 | -0.47990800 |
| N  | 0.13670300  | -1.31135600 | 1.42789500  |
| C  | 1.43096900  | -2.06998800 | 1.57814400  |
| H  | 2.11805700  | -1.46378800 | 2.16819400  |
| C  | 0.02845800  | -0.34126800 | 2.55534000  |
| H  | 0.25952200  | -0.87174900 | 3.48703600  |
| H  | -0.99845300 | 0.01420100  | 2.62046000  |
| C  | -2.39762700 | -1.71842600 | 1.43441900  |
| C  | 2.70803500  | -1.25984500 | -0.43090200 |
| C  | 4.06449600  | -1.19826000 | -0.75856200 |
| C  | 4.58053500  | -0.07762300 | -1.40327700 |
| H  | 4.70111200  | -2.03867800 | -0.50381400 |
| C  | 2.38885700  | 0.87478100  | -1.35499900 |
| C  | 3.72492700  | 0.97972300  | -1.71149800 |
| H  | 5.63384000  | -0.03072400 | -1.66214600 |
| H  | 1.68651100  | 1.66790300  | -1.57484400 |
| H  | 4.07437400  | 1.87292200  | -2.21714700 |
| C  | 0.38437300  | 1.90481300  | 1.46092700  |
| C  | 0.36759700  | 3.25373700  | 1.82821100  |
| C  | -0.59595800 | 2.45068500  | -0.58667100 |
| C  | -0.14170000 | 4.21260100  | 0.96003700  |
| H  | 0.76010900  | 3.53346500  | 2.79995700  |

|   |             |             |             |
|---|-------------|-------------|-------------|
| C | -0.63281900 | 3.80109300  | -0.27868300 |
| H | -0.94871000 | 2.09787100  | -1.54579700 |
| H | -0.15439000 | 5.26042400  | 1.24345800  |
| H | -1.03637500 | 4.50292300  | -0.99978000 |
| C | -2.84943900 | -0.97246000 | 0.20771000  |
| C | -4.22368900 | -0.86757100 | -0.04771400 |
| C | -4.68399700 | -0.24911400 | -1.20119400 |
| H | -4.91542100 | -1.29623400 | 0.66992400  |
| C | -2.40899500 | 0.11468500  | -1.82158500 |
| C | -3.75233200 | 0.23589800  | -2.12249500 |
| H | -5.74912000 | -0.16944900 | -1.39498300 |
| H | -1.64698800 | 0.44286200  | -2.51883100 |
| H | -4.05183000 | 0.69123800  | -3.05957700 |
| N | -1.96853100 | -0.43607600 | -0.66278000 |
| N | 1.90145500  | -0.21226500 | -0.72326400 |
| N | -0.10650400 | 1.51720000  | 0.26031400  |
| C | -0.98723000 | -2.29709400 | 1.45029800  |
| H | -0.89559900 | -2.89447300 | 2.36580400  |
| H | -0.83845800 | -2.96546400 | 0.59867800  |
| H | -2.58402800 | -1.09537600 | 2.31555700  |
| H | -3.07184300 | -2.57434900 | 1.54835100  |
| C | 0.94807400  | 0.86891800  | 2.39012600  |
| H | 1.94136700  | 0.57093300  | 2.03371400  |
| H | 1.09586600  | 1.32544400  | 3.37187000  |
| H | 1.22145700  | -2.97464600 | 2.15708700  |
| C | 2.11944800  | -2.45266600 | 0.26980700  |
| H | 1.41824100  | -2.95843000 | -0.39778000 |
| H | 2.92521100  | -3.15091500 | 0.51143800  |
| O | 0.05969000  | -1.70469300 | -1.68351800 |
| H | -0.81529200 | -2.13176500 | -1.73103600 |

**'14**

E (SMD/B3LYP-D3/BS1) = -1355.65281524 au

G (SMD/B3LYP-D3/BS1) = -1355.268626 au

E (SMD/B3LYP-D3/BS2//SMD/B3LYP-D3/BS1) = -2693.53354912 au

charge = 1      spin multiplicity = 3

|    |             |             |             |
|----|-------------|-------------|-------------|
| Ni | -0.05013400 | -0.37817600 | -0.38328800 |
| N  | 0.02515400  | -0.88763700 | 1.71311900  |
| C  | 1.29370100  | -1.62731500 | 2.04428600  |
| H  | 1.99467200  | -0.92725000 | 2.50152400  |
| C  | -0.08198300 | 0.31572400  | 2.58524500  |
| H  | 0.09942300  | 0.01933700  | 3.62763900  |
| H  | -1.10138600 | 0.69608500  | 2.52459400  |
| C  | -2.53768100 | -1.28882000 | 1.83665600  |
| C  | 2.76404600  | -1.30234800 | 0.02438400  |
| C  | 4.14543300  | -1.39918900 | -0.15997900 |
| C  | 4.80837100  | -0.42423300 | -0.90439600 |

|   |             |             |             |
|---|-------------|-------------|-------------|
| H | 4.68666200  | -2.23209700 | 0.27743200  |
| C | 2.70367000  | 0.67002200  | -1.20854800 |
| C | 4.07486500  | 0.63449400  | -1.44174200 |
| H | 5.88144600  | -0.48881700 | -1.06052200 |
| H | 2.08268400  | 1.46913500  | -1.60065500 |
| H | 4.54784600  | 1.41632500  | -2.02663800 |
| C | 0.36607900  | 2.33234900  | 1.07882800  |
| C | 0.39810600  | 3.72662500  | 1.19321400  |
| C | -0.54801800 | 2.51051300  | -1.05265200 |
| C | -0.05409700 | 4.51980100  | 0.14183200  |
| H | 0.77845200  | 4.17603000  | 2.10484100  |
| C | -0.53779500 | 3.89935900  | -1.01053800 |
| H | -0.90718800 | 1.98084300  | -1.92772000 |
| H | -0.03068400 | 5.60275100  | 0.22120900  |
| H | -0.89852900 | 4.47104100  | -1.85896500 |
| C | -3.06564100 | -0.88934600 | 0.47970200  |
| C | -4.45030000 | -0.92269500 | 0.25481600  |
| C | -4.96235400 | -0.55495900 | -0.98372400 |
| H | -5.10884300 | -1.24337500 | 1.05616200  |
| C | -2.71641700 | -0.17355100 | -1.70143100 |
| C | -4.07299600 | -0.17668900 | -1.99228800 |
| H | -6.03306100 | -0.57543100 | -1.16543500 |
| H | -1.98160400 | 0.08199600  | -2.45581000 |
| H | -4.41726500 | 0.10234200  | -2.98257800 |
| N | -2.21822300 | -0.50060300 | -0.49017800 |
| N | 2.06737200  | -0.27132300 | -0.49540600 |
| N | -0.11059300 | 1.74058500  | -0.03776300 |
| C | -1.11179000 | -1.83414700 | 1.94838300  |
| H | -1.01362000 | -2.24064900 | 2.96480700  |
| H | -0.97474700 | -2.66147400 | 1.24552000  |
| H | -2.68860200 | -0.45375000 | 2.53091100  |
| H | -3.18622600 | -2.08678800 | 2.21644800  |
| C | 0.87502600  | 1.45267500  | 2.19343600  |
| H | 1.85332300  | 1.05140000  | 1.90381200  |
| H | 1.04456500  | 2.07506600  | 3.07673500  |
| H | 1.06435200  | -2.38301200 | 2.80408600  |
| C | 1.98243100  | -2.29562600 | 0.84389500  |
| H | 1.24185900  | -2.78970100 | 0.20517400  |
| H | 2.66015600  | -3.06638100 | 1.22349800  |
| O | -0.19014300 | -1.73769900 | -1.72312300 |
| O | 1.06096200  | -2.23928000 | -2.30131500 |
| H | 0.86161500  | -3.19190600 | -2.32317200 |

**TS**<sub>14-15</sub>

E (SMD/B3LYP-D3/BS1) = -1355.61935294 au

G (SMD/B3LYP-D3/BS1) = -1355.233372 au

E (SMD/B3LYP-D3/BS2//SMD/B3LYP-D3/BS1) = -2693.49912972 au



negative eigenvalue of the frequency: 549i

charge = 1 spin multiplicity = 3

|    |             |             |             |
|----|-------------|-------------|-------------|
| Ni | 0.04120300  | -0.29291000 | -0.47472800 |
| N  | -0.01158100 | -1.30726600 | 1.33534000  |
| C  | 1.32622300  | -1.86681500 | 1.72241700  |
| H  | 1.89824700  | -1.08132200 | 2.21409100  |
| C  | -0.51305500 | -0.41569300 | 2.42160000  |
| H  | -0.52011700 | -0.98083400 | 3.36339100  |
| H  | -1.54171100 | -0.14523800 | 2.18425100  |
| C  | -2.43631800 | -2.18562900 | 1.08965100  |
| C  | 2.92533200  | -1.31812100 | -0.14256600 |
| C  | 4.29822000  | -1.41175400 | -0.38891500 |
| C  | 4.96234400  | -0.34747200 | -0.99565000 |
| H  | 4.83207100  | -2.31113300 | -0.09873400 |
| C  | 2.87494700  | 0.81731100  | -1.05592600 |
| C  | 4.23808200  | 0.79700700  | -1.33149700 |
| H  | 6.02848800  | -0.40693600 | -1.19469900 |
| H  | 2.26850000  | 1.68208200  | -1.30220300 |
| H  | 4.71119100  | 1.65558300  | -1.79622600 |
| C  | 0.05643900  | 1.95798600  | 1.59109200  |
| C  | -0.03284300 | 3.29757700  | 1.98845700  |
| C  | -0.12101900 | 2.59806500  | -0.63980200 |
| C  | -0.16518900 | 4.30126400  | 1.03399000  |
| H  | 0.00816000  | 3.53831300  | 3.04587700  |
| C  | -0.20226100 | 3.94476600  | -0.31438800 |
| H  | -0.13417900 | 2.26222300  | -1.67179600 |
| H  | -0.23451400 | 5.34200700  | 1.33638900  |
| H  | -0.29426600 | 4.68626500  | -1.10071400 |
| C  | -2.98775200 | -1.22475000 | 0.06310400  |
| C  | -4.36090700 | -1.27787600 | -0.22135100 |
| C  | -4.92185400 | -0.37166000 | -1.11228600 |
| H  | -4.97209500 | -2.03174100 | 0.26562200  |
| C  | -2.73943600 | 0.56162900  | -1.38914400 |
| C  | -4.08963600 | 0.57650000  | -1.71068100 |
| H  | -5.98375300 | -0.40442300 | -1.33846300 |
| H  | -2.05731600 | 1.26206200  | -1.85034000 |
| H  | -4.47100800 | 1.30736800  | -2.41613800 |
| N  | -2.18899200 | -0.31169900 | -0.52160400 |
| N  | 2.22990800  | -0.21371300 | -0.48355100 |
| N  | -0.00428400 | 1.62328500  | 0.28509600  |
| C  | -0.93695800 | -2.47080400 | 1.12399700  |
| H  | -0.77499600 | -3.18724100 | 1.93934400  |
| H  | -0.63487900 | -2.94924600 | 0.18989600  |
| H  | -2.78333300 | -1.86145700 | 2.07907200  |
| H  | -2.91586400 | -3.15865000 | 0.92981400  |
| C  | 0.27851300  | 0.88013200  | 2.62170400  |
| H  | 1.35572100  | 0.68559100  | 2.68341500  |

|   |             |             |             |
|---|-------------|-------------|-------------|
| H | -0.00616000 | 1.27985300  | 3.59961200  |
| H | 1.15926400  | -2.65707600 | 2.46399300  |
| C | 2.16202400  | -2.41226000 | 0.55562000  |
| H | 1.52561700  | -2.93043000 | -0.16935900 |
| H | 2.86859400  | -3.14696300 | 0.95229000  |
| O | 0.01643900  | 0.07120100  | -2.37659400 |
| O | 0.07392700  | -1.73343800 | -1.63347600 |
| H | 0.92696900  | -0.05995700 | -2.69895300 |

'15

E (SMD/B3LYP-D3/BS1) = -1355.62993494 au

G (SMD/B3LYP-D3/BS1) = -1355.243553 au

E (SMD/B3LYP-D3/BS2//SMD/B3LYP-D3/BS1) = -2693.51204212 au

charge = 1 spin multiplicity = 3

|    |             |             |             |
|----|-------------|-------------|-------------|
| Ni | 0.03638200  | -0.33043400 | -0.55103300 |
| N  | 0.10518600  | -1.33644200 | 1.28590100  |
| C  | 1.41261800  | -2.07748400 | 1.50879400  |
| H  | 2.04996800  | -1.45768200 | 2.13911500  |
| C  | -0.07190300 | -0.39451500 | 2.43070800  |
| H  | 0.07867700  | -0.95650800 | 3.36073900  |
| H  | -1.09830800 | -0.03111500 | 2.42244600  |
| C  | -2.43122400 | -1.89562200 | 1.40504900  |
| C  | 2.93470600  | -1.28835500 | -0.31929100 |
| C  | 4.31415400  | -1.27974200 | -0.54633500 |
| C  | 4.91910900  | -0.12349300 | -1.03511300 |
| H  | 4.89621900  | -2.17048800 | -0.33292600 |
| C  | 2.76406800  | 0.91717400  | -1.04310400 |
| C  | 4.13092500  | 1.00228400  | -1.28241700 |
| H  | 5.98983300  | -0.09947500 | -1.21626800 |
| H  | 2.09490300  | 1.74598600  | -1.23851400 |
| H  | 4.55967500  | 1.92526300  | -1.65828900 |
| C  | 0.33886500  | 1.90238000  | 1.49593700  |
| C  | 0.28462800  | 3.22547700  | 1.94473000  |
| C  | -0.60725900 | 2.53119900  | -0.53290600 |
| C  | -0.23614000 | 4.21896700  | 1.12229200  |
| H  | 0.64876700  | 3.45686700  | 2.94024100  |
| C  | -0.69765400 | 3.86054100  | -0.14342000 |
| H  | -0.91422400 | 2.21005600  | -1.51713500 |
| H  | -0.28432100 | 5.24874300  | 1.46358200  |
| H  | -1.11700200 | 4.59059200  | -0.82736700 |
| C  | -3.02535500 | -1.09560000 | 0.27371100  |
| C  | -4.42314300 | -1.01712000 | 0.17349800  |
| C  | -5.00593800 | -0.31267700 | -0.87232000 |
| H  | -5.03399900 | -1.52120400 | 0.91638000  |
| C  | -2.79886800 | 0.17581000  | -1.65251300 |
| C  | -4.17221700 | 0.28918600  | -1.81747000 |
| H  | -6.08672200 | -0.24674700 | -0.95892300 |

|   |             |             |             |
|---|-------------|-------------|-------------|
| H | -2.09433200 | 0.60284400  | -2.35542400 |
| H | -4.57202400 | 0.83254900  | -2.66738700 |
| N | -2.23004400 | -0.48022700 | -0.61928100 |
| N | 2.18561700  | -0.19815100 | -0.57048800 |
| N | -0.10237000 | 1.56623600  | 0.26328000  |
| C | -0.98685500 | -2.37306800 | 1.29035400  |
| H | -0.81212900 | -3.02660100 | 2.15283900  |
| H | -0.84836500 | -2.95405600 | 0.37839100  |
| H | -2.59818500 | -1.36023700 | 2.34706200  |
| H | -3.02582700 | -2.81245000 | 1.50069400  |
| C | 0.86581700  | 0.81442400  | 2.38596000  |
| H | 1.87144600  | 0.53114400  | 2.05650200  |
| H | 0.96877400  | 1.20751900  | 3.40065300  |
| H | 1.17890700  | -2.97618900 | 2.08536900  |
| C | 2.21564700  | -2.47218000 | 0.26678600  |
| H | 1.55828200  | -2.92930800 | -0.48126300 |
| H | 2.94634000  | -3.22774600 | 0.57111900  |
| O | 0.05409200  | 0.47102500  | -2.21355700 |
| O | -0.00227900 | -1.91047700 | -1.42536000 |
| H | 0.15784300  | -0.31939800 | -2.77485600 |

**'TS<sub>15</sub>**

E (SMD/B3LYP-D3/BS1) = -1587.87729845 au

G (SMD/B3LYP-D3/BS1) = -1587.399876 au

E (SMD/B3LYP-D3/BS2//SMD/B3LYP-D3/BS1) = -2925.84785750 au

negative eigenvalue of the frequency: 357i

charge = 1 spin multiplicity = 3

|    |             |             |             |
|----|-------------|-------------|-------------|
| Ni | -0.06468600 | -0.14876100 | -0.41058300 |
| N  | -0.95429600 | -2.12806100 | -1.00266200 |
| C  | 0.05550100  | -3.07100000 | -1.60437800 |
| H  | 0.39824800  | -3.75301300 | -0.82595600 |
| C  | -1.58880800 | -2.79084600 | 0.16881100  |
| H  | -1.96805900 | -3.77259000 | -0.14729000 |
| H  | -2.44294300 | -2.19036700 | 0.48106400  |
| C  | -3.30480000 | -1.20210300 | -1.63472200 |
| C  | 2.32433500  | -2.01756700 | -1.24724100 |
| C  | 3.62991600  | -2.52148100 | -1.25553500 |
| C  | 4.52302100  | -2.13153400 | -0.25844100 |
| H  | 3.93189300  | -3.21283200 | -2.03584700 |
| C  | 2.78242000  | -0.78500700 | 0.67760900  |
| C  | 4.09278000  | -1.24929200 | 0.73484700  |
| H  | 5.53951300  | -2.51463600 | -0.25419000 |
| H  | 2.38516500  | -0.08089000 | 1.40008300  |
| H  | 4.75283600  | -0.92299700 | 1.53177900  |
| C  | -0.62578900 | -1.77368000 | 2.29774900  |
| C  | -0.82683700 | -1.93330900 | 3.67393500  |
| C  | -0.34261300 | 0.51630600  | 2.58708200  |

|   |             |             |             |
|---|-------------|-------------|-------------|
| C | -0.78335000 | -0.82611900 | 4.51623000  |
| H | -1.01460200 | -2.92680000 | 4.06793600  |
| C | -0.53472800 | 0.42859700  | 3.96038100  |
| H | -0.11958900 | 1.45802500  | 2.09961100  |
| H | -0.94050700 | -0.94112100 | 5.58481600  |
| H | -0.48738100 | 1.32484900  | 4.56985400  |
| C | -3.37170900 | 0.16676500  | -0.99334900 |
| C | -4.61622100 | 0.81746300  | -0.94901300 |
| C | -4.72174500 | 2.07360700  | -0.36425900 |
| H | -5.48558300 | 0.32900700  | -1.37925700 |
| C | -2.37510100 | 1.96975000  | 0.07719200  |
| C | -3.57097300 | 2.67038400  | 0.15804700  |
| H | -5.68001400 | 2.58382800  | -0.32497300 |
| H | -1.43940800 | 2.38288500  | 0.43655300  |
| H | -3.59566500 | 3.65594400  | 0.61165500  |
| N | -2.27568400 | 0.74191800  | -0.47099400 |
| N | 1.92951500  | -1.16025400 | -0.28663800 |
| N | -0.39115200 | -0.55367600 | 1.77141100  |
| C | -1.96138000 | -1.79572100 | -2.06412500 |
| H | -2.20538800 | -2.72325600 | -2.59822600 |
| H | -1.45078000 | -1.11925000 | -2.75195600 |
| H | -3.85102000 | -1.90796500 | -0.99695000 |
| H | -3.89641700 | -1.15244900 | -2.55759500 |
| C | -0.65485600 | -2.96329400 | 1.37714900  |
| H | 0.37043700  | -3.17722800 | 1.05596800  |
| H | -0.98877600 | -3.83513400 | 1.94614700  |
| H | -0.46591400 | -3.68519000 | -2.34682500 |
| C | 1.28868500  | -2.43129700 | -2.26130100 |
| H | 0.98764000  | -1.56351400 | -2.85360600 |
| H | 1.72669500  | -3.17275700 | -2.93668600 |
| O | 0.59995800  | 1.44364300  | 0.13981600  |
| O | 0.13943200  | 0.32226700  | -2.22847800 |
| H | -0.33893300 | 1.16706000  | -2.29382100 |
| C | 1.14317800  | 3.46263900  | -1.42209100 |
| C | 1.97714400  | 2.39640700  | -0.98518300 |
| C | 2.96430300  | 2.66278700  | 0.00381600  |
| C | 3.02928700  | 3.90835200  | 0.60928200  |
| C | 2.15095700  | 4.93199300  | 0.20998500  |
| C | 1.21537400  | 4.70792700  | -0.81169000 |
| H | 0.42512800  | 3.27982700  | -2.21576000 |
| H | 2.03331600  | 1.49723000  | -1.58734900 |
| H | 3.64215700  | 1.86801100  | 0.29879100  |
| H | 3.76527600  | 4.10151000  | 1.38517300  |
| H | 2.20697300  | 5.90677700  | 0.68724100  |
| H | 0.55516000  | 5.51122000  | -1.12730200 |

<sup>5</sup>TS<sub>15</sub>

E (SMD/B3LYP-D3/BS1) = -1587.85680787 au  
G (SMD/B3LYP-D3/BS1) = -1587.375403 au  
E (SMD/B3LYP-D3/BS2//SMD/B3LYP-D3/BS1) = -2925.83323727 au  
negative eigenvalue of the frequency: 398i

charge = 1      spin multiplicity = 1

|    |             |             |             |
|----|-------------|-------------|-------------|
| Ni | -0.27182600 | 0.11568900  | -0.32673400 |
| N  | 0.04258500  | 0.22492200  | 1.70402300  |
| C  | -0.00805500 | 1.62606800  | 2.23419700  |
| H  | -1.04826200 | 1.90476700  | 2.39511700  |
| C  | -0.91708600 | -0.62797100 | 2.47978100  |
| H  | -0.61965800 | -0.57040500 | 3.53489600  |
| H  | -0.78465300 | -1.65813200 | 2.15058800  |
| C  | 1.68223100  | -1.74087400 | 1.78359000  |
| C  | -0.33318900 | 2.99514700  | 0.21221600  |
| C  | -0.69318300 | 4.31712700  | -0.06481300 |
| C  | -1.70072800 | 4.58658800  | -0.98504200 |
| H  | -0.18630800 | 5.11803700  | 0.46305100  |
| C  | -1.92799000 | 2.22495500  | -1.30570600 |
| C  | -2.34794500 | 3.51458500  | -1.59949300 |
| H  | -1.98755200 | 5.61081300  | -1.20450700 |
| H  | -2.36982100 | 1.36720100  | -1.78559300 |
| H  | -3.15847500 | 3.66349200  | -2.30474100 |
| C  | -3.09386500 | -0.80528100 | 1.13115400  |
| C  | -4.37934100 | -1.35673000 | 1.21513800  |
| C  | -3.07151400 | -1.12412100 | -1.16151200 |
| C  | -5.01555000 | -1.79796700 | 0.05821300  |
| H  | -4.86528900 | -1.43316100 | 2.18292000  |
| C  | -4.34841000 | -1.67572200 | -1.16144200 |
| H  | -2.51130700 | -0.99247700 | -2.08027100 |
| H  | -6.01186300 | -2.22808200 | 0.10734800  |
| H  | -4.80058100 | -1.99914500 | -2.09340200 |
| C  | 1.25323300  | -2.41172500 | 0.50576900  |
| C  | 1.73829000  | -3.71037700 | 0.28401600  |
| C  | 1.33652700  | -4.43547300 | -0.82703100 |
| H  | 2.43112600  | -4.13171900 | 1.00573300  |
| C  | 0.01194800  | -2.54378900 | -1.45030300 |
| C  | 0.44073300  | -3.83494600 | -1.71222700 |
| H  | 1.71108000  | -5.44014100 | -0.99985700 |
| H  | -0.62817600 | -2.01079900 | -2.13535900 |
| H  | 0.08312500  | -4.34518800 | -2.60040600 |
| N  | 0.40138800  | -1.83194300 | -0.36674300 |
| N  | -0.93399400 | 1.96953400  | -0.43088200 |
| N  | -2.45030900 | -0.70140800 | -0.04567900 |
| C  | 1.44749900  | -0.25202300 | 1.93792300  |
| H  | 1.73135800  | 0.01703600  | 2.96245500  |
| H  | 2.06924200  | 0.28648700  | 1.22799300  |
| H  | 1.23071400  | -2.29693000 | 2.61453500  |

|   |             |             |             |
|---|-------------|-------------|-------------|
| H | 2.76247500  | -1.88924400 | 1.89072300  |
| C | -2.40554500 | -0.28176600 | 2.36538900  |
| H | -2.57655800 | 0.79875500  | 2.42822700  |
| H | -2.89754400 | -0.70876300 | 3.24495700  |
| H | 0.48603900  | 1.63269000  | 3.21178600  |
| C | 0.63367300  | 2.65749100  | 1.30501100  |
| H | 1.55971100  | 2.27417100  | 0.87195100  |
| H | 0.85928300  | 3.55850200  | 1.88191900  |
| O | 1.48579900  | 0.68425700  | -0.79232800 |
| O | -0.53754700 | 0.03835900  | -2.13819600 |
| H | 0.36218600  | 0.34300300  | -2.37470900 |
| C | 3.42655700  | 1.63575300  | -1.16587200 |
| C | 3.28757700  | 0.29877400  | -1.62145400 |
| C | 3.95399400  | -0.74028200 | -0.92488400 |
| C | 4.65606600  | -0.46232000 | 0.23566600  |
| C | 4.75604600  | 0.86566300  | 0.70865500  |
| C | 4.15898100  | 1.90419100  | 0.00457700  |
| H | 3.01675300  | 2.44912700  | -1.75258500 |
| H | 2.87647200  | 0.10012800  | -2.60339400 |
| H | 3.89364000  | -1.75771000 | -1.30110200 |
| H | 5.15109900  | -1.26403600 | 0.77791400  |
| H | 5.32134500  | 1.07405300  | 1.61336800  |
| H | 4.26208700  | 2.92986200  | 0.34907100  |

'16

E (SMD/B3LYP-D3/BS1) = -1648.56786085 au

G (SMD/B3LYP-D3/BS1) = -1647.966578 au

E (SMD/B3LYP-D3/BS2//SMD/B3LYP-D3/BS1) = -2986.55909052 au

charge = 2 spin multiplicity = 3

|    |             |             |             |
|----|-------------|-------------|-------------|
| Ni | -0.51657200 | -0.07081100 | -0.17760600 |
| N  | -1.41672000 | -0.84086500 | -1.88213200 |
| C  | -0.40120000 | -1.43769400 | -2.85468600 |
| H  | -0.48096000 | -2.52320400 | -2.78807600 |
| C  | -2.39840900 | -1.92801800 | -1.56815300 |
| H  | -2.66406600 | -2.41822600 | -2.51132400 |
| H  | -3.30373500 | -1.47769700 | -1.16583600 |
| C  | -3.26351800 | 0.98663300  | -1.88526700 |
| C  | 1.68921300  | -1.74434900 | -1.49390300 |
| C  | 2.86026900  | -2.50324500 | -1.58487900 |
| C  | 3.34412600  | -3.15524100 | -0.45241500 |
| H  | 3.37307700  | -2.57980700 | -2.53805400 |
| C  | 1.48451600  | -2.26760600 | 0.76139700  |
| C  | 2.63496900  | -3.04700400 | 0.74540200  |
| H  | 4.25358300  | -3.74619000 | -0.50550700 |
| H  | 0.90238500  | -2.15566800 | 1.66985100  |
| H  | 2.96385300  | -3.54602600 | 1.65046100  |
| C  | -2.02467500 | -2.44575700 | 0.84173800  |

|   |             |             |             |
|---|-------------|-------------|-------------|
| C | -2.64524000 | -3.21633100 | 1.82897500  |
| C | -1.86906600 | -0.65060800 | 2.32172700  |
| C | -2.87507300 | -2.67925500 | 3.09117500  |
| H | -2.95387900 | -4.22751900 | 1.58594400  |
| C | -2.49629100 | -1.35908500 | 3.33535900  |
| H | -1.54600400 | 0.36917100  | 2.47181700  |
| H | -3.35699700 | -3.27197500 | 3.86273900  |
| H | -2.67672400 | -0.87842800 | 4.29064800  |
| C | -2.88740000 | 1.99354700  | -0.83210900 |
| C | -3.58743700 | 3.20393300  | -0.74293100 |
| C | -3.26113600 | 4.12292400  | 0.24974300  |
| H | -4.37925100 | 3.41186500  | -1.45541000 |
| C | -1.57030500 | 2.59802200  | 0.98222100  |
| C | -2.22663200 | 3.81362300  | 1.13268800  |
| H | -3.79737300 | 5.06438600  | 0.32612700  |
| H | -0.74081400 | 2.30838400  | 1.61436300  |
| H | -1.92152800 | 4.49765200  | 1.91764500  |
| N | -1.89783400 | 1.69936200  | 0.03245000  |
| N | 1.02833900  | -1.62351800 | -0.32585600 |
| N | -1.61514000 | -1.18379400 | 1.10631100  |
| C | -2.11982100 | 0.27443100  | -2.61221900 |
| H | -2.53666100 | -0.16401200 | -3.52613900 |
| H | -1.34649000 | 0.99059600  | -2.88923400 |
| H | -3.96670700 | 0.26911600  | -1.44739800 |
| H | -3.83171500 | 1.50609600  | -2.66346500 |
| C | -1.88041300 | -2.95844700 | -0.56274200 |
| H | -0.84201300 | -3.23329100 | -0.76949300 |
| H | -2.47642000 | -3.86875000 | -0.66602400 |
| H | -0.72464400 | -1.15656700 | -3.85966400 |
| C | 1.07240800  | -1.06453800 | -2.68357100 |
| H | 1.18962900  | 0.02342400  | -2.60214400 |
| H | 1.59387000  | -1.37642000 | -3.59387300 |
| O | 0.48965100  | 0.62027200  | 1.25403300  |
| O | 0.34613200  | 1.11258000  | -1.21855500 |
| H | 0.57291800  | -0.07835700 | 1.92444600  |
| N | 3.02021100  | 1.37706900  | 0.56914900  |
| C | 2.92623100  | 2.73412600  | 1.22390600  |
| H | 2.50660800  | 2.55743100  | 2.21476600  |
| H | 3.94285900  | 3.11610000  | 1.34385200  |
| C | 3.38793400  | 1.42924600  | -0.89572600 |
| H | 3.38453900  | 0.39188100  | -1.23474000 |
| H | 2.56769100  | 1.93772100  | -1.39822200 |
| C | 3.93616600  | 0.43807300  | 1.31963500  |
| H | 3.97589400  | -0.47555000 | 0.72256100  |
| H | 4.92866600  | 0.89295800  | 1.32534600  |
| C | 4.72497500  | 2.09450900  | -1.18974000 |
| H | 5.56492100  | 1.57355000  | -0.72072000 |

|   |            |             |             |
|---|------------|-------------|-------------|
| H | 4.88169200 | 2.07026900  | -2.27362200 |
| H | 4.74177600 | 3.14242000  | -0.87506100 |
| C | 2.03901700 | 3.70196200  | 0.45094900  |
| H | 1.85125700 | 4.57821700  | 1.08041700  |
| H | 2.51000600 | 4.04648900  | -0.47432600 |
| H | 1.07795800 | 3.24115200  | 0.20529300  |
| C | 3.48835100 | 0.11445900  | 2.73887600  |
| H | 4.19137700 | -0.61721800 | 3.15144700  |
| H | 3.49634100 | 0.98919200  | 3.39495500  |
| H | 2.49277400 | -0.33621000 | 2.76183200  |
| H | 2.03871200 | 0.98530900  | 0.64082600  |

**TS<sub>16-17</sub>**

E (SMD/B3LYP-D3/BS1) = -1648.54865875 au

G (SMD/B3LYP-D3/BS1) = -1647.950473 au

E (SMD/B3LYP-D3/BS2//SMD/B3LYP-D3/BS1) = -2986.54513525 au

negative eigenvalue of the frequency: 137i

charge = 2      spin multiplicity = 3

|    |             |             |             |
|----|-------------|-------------|-------------|
| Ni | -0.63131500 | 0.02644400  | -0.21812400 |
| N  | -2.01601700 | -0.89101300 | -1.67602800 |
| C  | -1.30366800 | -1.81025300 | -2.63888000 |
| H  | -1.53991400 | -2.84029100 | -2.36559800 |
| C  | -3.09627000 | -1.67602700 | -1.01270000 |
| H  | -3.58541600 | -2.30289200 | -1.76779500 |
| H  | -3.85017700 | -0.99476200 | -0.62198300 |
| C  | -3.33338100 | 1.29834500  | -1.63626000 |
| C  | 0.85356700  | -2.18861800 | -1.43592500 |
| C  | 1.74131700  | -3.26787900 | -1.45659500 |
| C  | 2.25292200  | -3.77422200 | -0.26599100 |
| H  | 2.01703400  | -3.69968300 | -2.41247900 |
| C  | 0.96285700  | -2.13019000 | 0.89822700  |
| C  | 1.84582000  | -3.19919000 | 0.93822000  |
| H  | 2.94765900  | -4.60852100 | -0.27628000 |
| H  | 0.61104700  | -1.66826300 | 1.80763600  |
| H  | 2.19781300  | -3.56464200 | 1.89641100  |
| C  | -2.38843900 | -1.74158200 | 1.39941200  |
| C  | -2.99155300 | -2.15160600 | 2.59224700  |
| C  | -1.54271600 | 0.15282900  | 2.47992700  |
| C  | -2.86061100 | -1.38742700 | 3.74669800  |
| H  | -3.56743200 | -3.07063100 | 2.59523900  |
| C  | -2.12624700 | -0.20395100 | 3.68554900  |
| H  | -0.93924000 | 1.04373600  | 2.39832900  |
| H  | -3.32894400 | -1.70561000 | 4.67308500  |
| H  | -1.99717700 | 0.43735500  | 4.55034200  |
| C  | -2.49741600 | 2.27963100  | -0.86452400 |
| C  | -2.87210800 | 3.62809100  | -0.84911000 |
| C  | -2.13467900 | 4.56070900  | -0.12843000 |



|   |             |             |             |
|---|-------------|-------------|-------------|
| H | -3.74794700 | 3.92906800  | -1.41409000 |
| C | -0.67546400 | 2.78045300  | 0.52277700  |
| C | -1.01038600 | 4.12520100  | 0.56998700  |
| H | -2.42733500 | 5.60632200  | -0.12203800 |
| H | 0.19170400  | 2.36883600  | 1.03457900  |
| H | -0.38737400 | 4.80724400  | 1.13835700  |
| N | -1.41396100 | 1.87479100  | -0.16235200 |
| N | 0.48702300  | -1.62837400 | -0.25925300 |
| N | -1.66023000 | -0.59806700 | 1.36128500  |
| C | -2.59152700 | 0.24302600  | -2.45615500 |
| H | -3.29677100 | -0.17245800 | -3.18807700 |
| H | -1.76476600 | 0.70567500  | -2.99836100 |
| H | -4.04714900 | 0.83747100  | -0.94456000 |
| H | -3.94248200 | 1.86949500  | -2.34247400 |
| C | -2.58126400 | -2.54067900 | 0.13943700  |
| H | -1.65162500 | -3.04967800 | -0.13516800 |
| H | -3.31794700 | -3.32280700 | 0.33857500  |
| H | -1.71997300 | -1.64102300 | -3.63678500 |
| C | 0.21888900  | -1.67378700 | -2.69491900 |
| H | 0.50306200  | -0.63196500 | -2.87726100 |
| H | 0.57706300  | -2.26422700 | -3.54299000 |
| O | 1.19281900  | 0.81213600  | 1.37431100  |
| O | 0.31673800  | 0.79249100  | -1.49782800 |
| H | 1.22385900  | 0.24294000  | 2.15878800  |
| N | 3.51008500  | 0.82419000  | 0.35623000  |
| C | 3.81184100  | 2.27142500  | 0.11667000  |
| H | 3.63043900  | 2.78151500  | 1.06457000  |
| H | 4.87638400  | 2.37222700  | -0.12033300 |
| C | 3.50445800  | -0.01384800 | -0.88613000 |
| H | 3.28973700  | -1.03196900 | -0.55659100 |
| H | 2.65057600  | 0.31862400  | -1.47868500 |
| C | 4.38278700  | 0.22327700  | 1.41845900  |
| H | 4.05074500  | -0.81461400 | 1.51917700  |
| H | 5.41754400  | 0.21697600  | 1.06336400  |
| C | 4.79139500  | 0.01345200  | -1.70345800 |
| H | 5.65520300  | -0.33265100 | -1.12687000 |
| H | 4.67069400  | -0.65991500 | -2.55957700 |
| H | 5.01234700  | 1.01195000  | -2.09335700 |
| C | 2.93825500  | 2.89721200  | -0.96581400 |
| H | 3.08903300  | 3.98218600  | -0.95183700 |
| H | 3.19226900  | 2.53628900  | -1.96701200 |
| H | 1.87955000  | 2.69020300  | -0.78696900 |
| C | 4.28029700  | 0.93362100  | 2.76576200  |
| H | 4.76370000  | 0.31164400  | 3.52678400  |
| H | 4.78233800  | 1.90556700  | 2.76332800  |
| H | 3.23537700  | 1.08304400  | 3.05697200  |
| H | 2.42651900  | 0.78201700  | 0.78718000  |

t<sup>17</sup>

E (SMD/B3LYP-D3/BS1) = -1279.65924913 au

G (SMD/B3LYP-D3/BS1) = -1279.281214 au

E (SMD/B3LYP-D3/BS2//SMD/B3LYP-D3/BS1) = -2617.50026489 au

charge = 2 spin multiplicity = 3

|    |             |             |             |
|----|-------------|-------------|-------------|
| Ni | -0.07102900 | -0.33188600 | -0.45187800 |
| N  | 0.11024400  | -1.29276600 | 1.45316300  |
| C  | 1.34999000  | -2.14738100 | 1.54772500  |
| H  | 2.09674500  | -1.60599800 | 2.12895200  |
| C  | 0.13379500  | -0.30533600 | 2.57083300  |
| H  | 0.38535300  | -0.84162900 | 3.49366900  |
| H  | -0.86223800 | 0.11683200  | 2.69246700  |
| C  | -2.44950500 | -1.50546100 | 1.52513400  |
| C  | 2.61056200  | -1.39340600 | -0.49766500 |
| C  | 3.96754900  | -1.38312600 | -0.82634500 |
| C  | 4.51976500  | -0.28955500 | -1.48744700 |
| H  | 4.57408300  | -2.24230100 | -0.56146500 |
| C  | 2.36056500  | 0.73708900  | -1.46163900 |
| C  | 3.69880000  | 0.78876300  | -1.81871900 |
| H  | 5.57418600  | -0.28087700 | -1.74530700 |
| H  | 1.68272100  | 1.54633500  | -1.69809700 |
| H  | 4.07775800  | 1.65910300  | -2.34248500 |
| C  | 0.56792800  | 1.89873200  | 1.42614400  |
| C  | 0.65410500  | 3.24990500  | 1.77377700  |
| C  | -0.51728400 | 2.47901800  | -0.56065600 |
| C  | 0.14367100  | 4.22708500  | 0.92655400  |
| H  | 1.12579800  | 3.51664800  | 2.71342200  |
| C  | -0.45530700 | 3.83218500  | -0.26947800 |
| H  | -0.96057800 | 2.13657300  | -1.48579600 |
| H  | 0.21074600  | 5.27695600  | 1.19450600  |
| H  | -0.86848700 | 4.54891000  | -0.97017200 |
| C  | -2.90284400 | -0.86433500 | 0.24209800  |
| C  | -4.27211500 | -0.80408600 | -0.04601200 |
| C  | -4.72108700 | -0.24290200 | -1.23434800 |
| H  | -4.97054000 | -1.21580900 | 0.67487600  |
| C  | -2.44275700 | 0.15298700  | -1.82245700 |
| C  | -3.78325300 | 0.23524500  | -2.15167800 |
| H  | -5.78331400 | -0.19950200 | -1.45376300 |
| H  | -1.67443200 | 0.47613700  | -2.51474900 |
| H  | -4.07415500 | 0.65190100  | -3.10919500 |
| N  | -2.01777800 | -0.34836100 | -0.63701400 |
| N  | 1.84158400  | -0.32031900 | -0.80178500 |
| N  | -0.02319500 | 1.52946100  | 0.26558900  |
| C  | -1.08482100 | -2.18898300 | 1.54090200  |
| H  | -1.01344900 | -2.74850200 | 2.48191100  |
| H  | -1.00691400 | -2.89959900 | 0.71460600  |

|   |             |             |             |
|---|-------------|-------------|-------------|
| H | -2.53880600 | -0.77110900 | 2.33308100  |
| H | -3.17830400 | -2.28473800 | 1.76904100  |
| C | 1.12165000  | 0.83736800  | 2.33298400  |
| H | 2.06764300  | 0.46680700  | 1.92029400  |
| H | 1.36080500  | 1.29340300  | 3.29667200  |
| H | 1.09079100  | -3.04697400 | 2.11361300  |
| C | 1.97329200  | -2.55494100 | 0.21394800  |
| H | 1.22404000  | -3.02581100 | -0.42857700 |
| H | 2.74321300  | -3.30166600 | 0.42477000  |
| O | -0.18825700 | -1.68269500 | -1.56141200 |

**§17**

E (SMD/B3LYP-D3/BS1) = -1279.62672080 au

G (SMD/B3LYP-D3/BS1) = -1279.246330 au

E (SMD/B3LYP-D3/BS2//SMD/B3LYP-D3/BS1) = -2617.47069658 au

charge = 2      spin multiplicity = 1

|    |             |             |             |
|----|-------------|-------------|-------------|
| Ni | -0.04516900 | -0.40640600 | -0.44325400 |
| N  | 0.10073300  | -1.25000800 | 1.43102100  |
| C  | 1.33561300  | -2.12653500 | 1.50140700  |
| H  | 2.09720400  | -1.58528000 | 2.06200200  |
| C  | 0.14362700  | -0.26240700 | 2.55144800  |
| H  | 0.41282700  | -0.81876300 | 3.45614900  |
| H  | -0.85315200 | 0.14930400  | 2.69208600  |
| C  | -2.46245600 | -1.46580800 | 1.57369500  |
| C  | 2.61931700  | -1.40283400 | -0.49682200 |
| C  | 3.97132400  | -1.42110100 | -0.83608400 |
| C  | 4.55671300  | -0.29175500 | -1.40434700 |
| H  | 4.54596900  | -2.32223900 | -0.65192300 |
| C  | 2.43550000  | 0.80935100  | -1.25627800 |
| C  | 3.77463200  | 0.84286000  | -1.61995600 |
| H  | 5.60745800  | -0.29797200 | -1.67677700 |
| H  | 1.78594300  | 1.66006900  | -1.41264800 |
| H  | 4.18289000  | 1.74450400  | -2.06245200 |
| C  | 0.54081500  | 1.91108300  | 1.38605400  |
| C  | 0.63640100  | 3.27563500  | 1.67064800  |
| C  | -0.60652500 | 2.39254000  | -0.59056300 |
| C  | 0.09704200  | 4.21032500  | 0.79389000  |
| H  | 1.13858800  | 3.58409700  | 2.58123900  |
| C  | -0.53795400 | 3.75826300  | -0.36295100 |
| H  | -1.07101400 | 2.00797400  | -1.48804200 |
| H  | 0.17043200  | 5.27191000  | 1.00874900  |
| H  | -0.97340700 | 4.44130300  | -1.08350700 |
| C  | -2.92133600 | -0.85224500 | 0.28252900  |
| C  | -4.29476600 | -0.75301300 | 0.02206500  |
| C  | -4.74451300 | -0.23916600 | -1.18577900 |
| H  | -4.99104600 | -1.10034800 | 0.77821600  |
| C  | -2.45911800 | 0.01702400  | -1.83452000 |

|   |             |             |             |
|---|-------------|-------------|-------------|
| C | -3.80170200 | 0.14219400  | -2.14288300 |
| H | -5.80783600 | -0.15912600 | -1.38937600 |
| H | -1.69413000 | 0.27095300  | -2.55610500 |
| H | -4.09188700 | 0.52112800  | -3.11641900 |
| N | -2.02697800 | -0.43341100 | -0.63258900 |
| N | 1.88823500  | -0.28453600 | -0.69484400 |
| N | -0.08725200 | 1.48673200  | 0.26693100  |
| C | -1.10274900 | -2.14560400 | 1.55165100  |
| H | -0.98881000 | -2.68592300 | 2.49813600  |
| H | -1.04045700 | -2.86803700 | 0.73451900  |
| H | -2.53632000 | -0.72649400 | 2.37777300  |
| H | -3.18109700 | -2.24800900 | 1.83906400  |
| C | 1.11891200  | 0.88512600  | 2.31641200  |
| H | 2.08006800  | 0.53034000  | 1.92671200  |
| H | 1.32808100  | 1.35747200  | 3.27919400  |
| H | 1.05879100  | -3.01179600 | 2.07794800  |
| C | 1.92305300  | -2.55915100 | 0.15791800  |
| H | 1.13907500  | -2.96494300 | -0.49155400 |
| H | 2.64259900  | -3.35909300 | 0.34908300  |
| O | -0.01877300 | -1.37397900 | -1.79747400 |

**TS<sub>17-18</sub>**

E (SMD/B3LYP-D3/BS1) = -1511.91979193 au

G (SMD/B3LYP-D3/BS1) = -1511.450402 au

E (SMD/B3LYP-D3/BS2//SMD/B3LYP-D3/BS1) = -2849.84705248 au

negative eigenvalue of the frequency: 337i

charge = 2      spin multiplicity = 3

|    |             |             |             |
|----|-------------|-------------|-------------|
| Ni | 0.22736300  | 0.03959000  | -0.17991400 |
| N  | 0.26245300  | -0.13762600 | 1.94904000  |
| C  | -0.08087900 | -1.53500400 | 2.39794400  |
| H  | 0.84322900  | -2.04358200 | 2.67491300  |
| C  | 1.57887800  | 0.23638700  | 2.54526600  |
| H  | 1.56224500  | -0.02554300 | 3.61054600  |
| H  | 1.70304200  | 1.31586700  | 2.47231000  |
| C  | -0.64836300 | 2.26240900  | 2.14400000  |
| C  | 0.10039800  | -2.81130800 | 0.24452700  |
| C  | 0.35513600  | -4.15264700 | -0.04656200 |
| C  | 1.22880600  | -4.48807200 | -1.07821300 |
| H  | -0.13910000 | -4.91995600 | 0.53951400  |
| C  | 1.56319200  | -2.15327500 | -1.47298300 |
| C  | 1.84489900  | -3.46985300 | -1.80738700 |
| H  | 1.42528200  | -5.53017800 | -1.31111900 |
| H  | 2.00687600  | -1.32226700 | -2.00701600 |
| H  | 2.52935100  | -3.68195200 | -2.62114400 |
| C  | 3.17893600  | 0.27718100  | 0.58978600  |
| C  | 4.52194500  | 0.56844500  | 0.33206200  |
| C  | 2.56435500  | 1.27839500  | -1.42237800 |

|   |             |             |             |
|---|-------------|-------------|-------------|
| C | 4.88062000  | 1.22656800  | -0.84017500 |
| H | 5.27202500  | 0.27486800  | 1.05875300  |
| C | 3.87833300  | 1.59197600  | -1.73891600 |
| H | 1.75962400  | 1.53396400  | -2.09968200 |
| H | 5.92212500  | 1.45368800  | -1.04677800 |
| H | 4.10030800  | 2.10750900  | -2.66685800 |
| C | -0.75509600 | 2.72470200  | 0.71475700  |
| C | -1.20393000 | 4.02742000  | 0.45597400  |
| C | -1.34234500 | 4.47801000  | -0.85004600 |
| H | -1.45092200 | 4.66830500  | 1.29593200  |
| C | -0.60814800 | 2.32865100  | -1.58449800 |
| C | -1.04443100 | 3.60394800  | -1.89794400 |
| H | -1.69254400 | 5.48605000  | -1.04976600 |
| H | -0.39752400 | 1.60240900  | -2.35990000 |
| H | -1.15649700 | 3.89281200  | -2.93696600 |
| N | -0.44407500 | 1.90461800  | -0.30881600 |
| N | 0.72387900  | -1.84243500 | -0.46644200 |
| N | 2.21494900  | 0.63639600  | -0.28790300 |
| C | -0.81949300 | 0.77324400  | 2.43438900  |
| H | -0.89343200 | 0.66342500  | 3.52403300  |
| H | -1.75209000 | 0.41129100  | 1.99682800  |
| H | 0.28634400  | 2.64618000  | 2.56775100  |
| H | -1.44066200 | 2.76918200  | 2.70496800  |
| C | 2.77047700  | -0.43067800 | 1.85268700  |
| H | 2.56062300  | -1.48317800 | 1.62639900  |
| H | 3.61717500  | -0.42734600 | 2.54443100  |
| H | -0.69020600 | -1.46146600 | 3.30437500  |
| C | -0.81451000 | -2.38747700 | 1.35976700  |
| H | -1.67064700 | -1.84263500 | 0.95221300  |
| H | -1.19398800 | -3.27918000 | 1.86640800  |
| O | -1.25862600 | -0.56035800 | -0.96876800 |
| C | -3.63547800 | -1.10198100 | -1.82905000 |
| C | -3.18383500 | 0.17925300  | -1.41584400 |
| C | -3.50364400 | 0.64269600  | -0.11541900 |
| C | -4.16868900 | -0.19163100 | 0.77723000  |
| C | -4.55691500 | -1.47590900 | 0.37377200  |
| C | -4.29636800 | -1.92681300 | -0.93232500 |
| H | -3.42721100 | -1.43659300 | -2.84064100 |
| H | -2.79811900 | 0.87277600  | -2.15248500 |
| H | -3.21514100 | 1.64550000  | 0.17877300  |
| H | -4.39448900 | 0.15374200  | 1.78177500  |
| H | -5.07478000 | -2.12647500 | 1.07314400  |
| H | -4.62159200 | -2.91739300 | -1.23664400 |

<sup>5</sup>TS<sub>17</sub>

E (SMD/B3LYP-D3/BS1) = -1511.89485386 au

G (SMD/B3LYP-D3/BS1) = -1511.421041 au

E (SMD/B3LYP-D3/BS2//SMD/B3LYP-D3/BS1) = -2849.82510305 au

negative eigenvalue of the frequency: 168i

charge = 2 spin multiplicity = 1

|    |             |             |             |
|----|-------------|-------------|-------------|
| Ni | -0.20393500 | -0.04989800 | -0.27531100 |
| N  | -0.20457200 | 0.18541200  | 1.95955600  |
| C  | 0.32340800  | 1.54923300  | 2.30104000  |
| H  | -0.50448300 | 2.16276700  | 2.66003600  |
| C  | -1.53131000 | 0.01141600  | 2.60724000  |
| H  | -1.48595800 | 0.42624900  | 3.62187200  |
| H  | -1.75214100 | -1.05066600 | 2.70321900  |
| C  | 0.42474900  | -2.28250300 | 2.11777700  |
| C  | 0.00974400  | 2.74950600  | 0.12810200  |
| C  | -0.23691000 | 4.09963200  | -0.12703600 |
| C  | -1.20396800 | 4.46302800  | -1.06066300 |
| H  | 0.33555500  | 4.84870800  | 0.40927300  |
| C  | -1.63144500 | 2.13777700  | -1.43215600 |
| C  | -1.91401000 | 3.46333400  | -1.72769900 |
| H  | -1.39875800 | 5.51082300  | -1.26788000 |
| H  | -2.14479700 | 1.32290500  | -1.92632600 |
| H  | -2.67170100 | 3.69652900  | -2.46735900 |
| C  | -3.07263700 | -0.15543400 | 0.63070100  |
| C  | -4.41928900 | -0.47843100 | 0.43391800  |
| C  | -2.50484100 | -1.37058000 | -1.28388600 |
| C  | -4.80578900 | -1.25812500 | -0.65031800 |
| H  | -5.15144000 | -0.10768200 | 1.14307700  |
| C  | -3.82470600 | -1.71667300 | -1.52856500 |
| H  | -1.72163200 | -1.69798400 | -1.95299000 |
| H  | -5.85157300 | -1.50493800 | -0.80568300 |
| H  | -4.06515400 | -2.32778300 | -2.39139900 |
| C  | 0.67346500  | -2.74510800 | 0.70895100  |
| C  | 1.17224800  | -4.03883200 | 0.50221400  |
| C  | 1.39270300  | -4.51465900 | -0.78328200 |
| H  | 1.38617700  | -4.65635300 | 1.36798500  |
| C  | 0.64611900  | -2.39795600 | -1.59832500 |
| C  | 1.11829100  | -3.67227700 | -1.86126500 |
| H  | 1.77792800  | -5.51730600 | -0.94176500 |
| H  | 0.46131500  | -1.69556100 | -2.40006200 |
| H  | 1.27462600  | -3.98283900 | -2.88833200 |
| N  | 0.41621800  | -1.94045500 | -0.34505000 |
| N  | -0.70328900 | 1.80047000  | -0.51676400 |
| N  | -2.13093000 | -0.61022900 | -0.23094600 |
| C  | 0.76959100  | -0.83103300 | 2.44106700  |
| H  | 0.85347700  | -0.73427500 | 3.53252100  |
| H  | 1.73808600  | -0.57411200 | 2.00723100  |
| H  | -0.61521800 | -2.51104800 | 2.37608600  |
| H  | 1.03153400  | -2.90553100 | 2.78117200  |
| C  | -2.65754600 | 0.67342300  | 1.81422400  |

|   |             |             |             |
|---|-------------|-------------|-------------|
| H | -2.36740300 | 1.67784700  | 1.48662200  |
| H | -3.52227500 | 0.79432700  | 2.47134700  |
| H | 1.03407800  | 1.44567500  | 3.12772500  |
| C | 1.00813000  | 2.27938300  | 1.14159400  |
| H | 1.73976200  | 1.62270500  | 0.66800000  |
| H | 1.54973500  | 3.13707700  | 1.54851800  |
| O | 0.98828700  | 0.29035100  | -1.44895800 |
| C | 3.42137800  | 1.31402800  | -1.65965000 |
| C | 3.10899300  | -0.05247700 | -1.42575300 |
| C | 3.45877400  | -0.64207600 | -0.18281300 |
| C | 4.08296600  | 0.11852900  | 0.79530700  |
| C | 4.38569300  | 1.47018400  | 0.54859600  |
| C | 4.04810600  | 2.06656200  | -0.67484900 |
| H | 3.16759300  | 1.75657000  | -2.61727700 |
| H | 2.85052700  | -0.69448500 | -2.25656300 |
| H | 3.24934300  | -1.69358000 | -0.01611000 |
| H | 4.35192700  | -0.32967900 | 1.74724000  |
| H | 4.88101100  | 2.05774600  | 1.31638500  |
| H | 4.28033400  | 3.11262800  | -0.85058000 |

'18

E (SMD/B3LYP-D3/BS1) = -1511.9920421 au

G (SMD/B3LYP-D3/BS1) = -1511.519590 au

E (SMD/B3LYP-D3/BS2//SMD/B3LYP-D3/BS1) = -2849.91137118 au

charge = 2 spin multiplicity = 3

|    |             |             |             |
|----|-------------|-------------|-------------|
| Ni | -0.04925400 | -0.02945300 | 0.06294500  |
| N  | 0.04185400  | -0.30043800 | 2.11468400  |
| C  | -1.30467600 | -0.35830000 | 2.76610800  |
| H  | -1.71653300 | -1.35628100 | 2.62197300  |
| C  | 0.81266300  | -1.54042800 | 2.42066900  |
| H  | 0.84444200  | -1.67862500 | 3.50944800  |
| H  | 1.83443200  | -1.39683600 | 2.06981100  |
| C  | 2.23842800  | 1.03359700  | 2.40146000  |
| C  | -2.95677900 | 0.21549900  | 0.94137100  |
| C  | -4.34454900 | 0.21189400  | 0.77828800  |
| C  | -4.89883800 | -0.23053500 | -0.42029100 |
| H  | -4.97539800 | 0.55372800  | 1.59210500  |
| C  | -2.67982400 | -0.64827800 | -1.20345200 |
| C  | -4.04863500 | -0.67811600 | -1.43243600 |
| H  | -5.97574900 | -0.23362400 | -0.55966300 |
| H  | -1.98209700 | -0.97563900 | -1.96380700 |
| H  | -4.43044600 | -1.04122700 | -2.38034200 |
| C  | 0.50461500  | -3.00105600 | 0.28993000  |
| C  | 0.87287700  | -4.26245300 | -0.19353700 |
| C  | 0.43436000  | -2.18433700 | -1.89400800 |
| C  | 1.01450900  | -4.47530300 | -1.56122200 |
| H  | 1.03894000  | -5.06953500 | 0.51240000  |

|   |             |             |             |
|---|-------------|-------------|-------------|
| C | 0.78039100  | -3.41362100 | -2.43533300 |
| H | 0.24642900  | -1.32771000 | -2.53207800 |
| H | 1.29926500  | -5.45304800 | -1.93816100 |
| H | 0.86764700  | -3.52599400 | -3.51041900 |
| C | 2.79234100  | 0.92999400  | 1.00125800  |
| C | 4.12946200  | 1.30047200  | 0.79680200  |
| C | 4.70640200  | 1.17187700  | -0.45886600 |
| H | 4.69999500  | 1.68502300  | 1.63634800  |
| C | 2.61287000  | 0.32270500  | -1.23217400 |
| C | 3.92816000  | 0.66220700  | -1.50109800 |
| H | 5.74024300  | 1.45998600  | -0.62404800 |
| H | 1.97791500  | -0.05708600 | -2.01998100 |
| H | 4.32428400  | 0.53451900  | -2.50262300 |
| N | 2.03985600  | 0.45613500  | -0.01369200 |
| N | -2.14080000 | -0.20261900 | -0.05190700 |
| N | 0.30583500  | -1.97276100 | -0.56639700 |
| C | 0.73297100  | 0.93866600  | 2.61432300  |
| H | 0.55352000  | 1.02543300  | 3.69320800  |
| H | 0.24510000  | 1.78971400  | 2.12902300  |
| H | 2.75899900  | 0.29550400  | 3.02388100  |
| H | 2.53585900  | 2.00755100  | 2.80792500  |
| C | 0.26117300  | -2.81544800 | 1.76989700  |
| H | -0.81659300 | -2.91403900 | 1.94555800  |
| H | 0.72231700  | -3.65853400 | 2.29213400  |
| H | -1.16609500 | -0.21197900 | 3.84424400  |
| C | -2.31289800 | 0.66486400  | 2.22556400  |
| H | -1.83725500 | 1.64034800  | 2.07339900  |
| H | -3.08929900 | 0.81024200  | 2.98133400  |
| O | -0.21283500 | 1.00257400  | -1.83301300 |
| C | -1.15320800 | 2.06330700  | -2.23261900 |
| C | 0.32936100  | 2.31145900  | -2.23795900 |
| C | 0.88631900  | 3.15829800  | -1.17245100 |
| C | 0.10072200  | 3.57787000  | -0.15337000 |
| C | -1.33526600 | 3.34727900  | -0.15368100 |
| C | -1.94805100 | 2.69152900  | -1.16673100 |
| H | -1.65282500 | 1.80731700  | -3.16226500 |
| H | 0.87885700  | 2.23152900  | -3.17114400 |
| H | 1.93067400  | 3.44461600  | -1.24291900 |
| H | 0.52311600  | 4.17845400  | 0.64735100  |
| H | -1.92524200 | 3.78732900  | 0.64516200  |
| H | -3.02933400 | 2.62887700  | -1.23367100 |

<sup>t</sup>TS<sub>18-19</sub>

E (SMD/B3LYP-D3/BS1) = -1511.96783935 au

G (SMD/B3LYP-D3/BS1) = -1511.497004 au

E (SMD/B3LYP-D3/BS2//SMD/B3LYP-D3/BS1) = -2849.88673099 au

negative eigenvalue of the frequency: -111i



```

charge = 2      spin multiplicity = 3
Ni      -0.05429800 -0.03458200  0.00360500
N       -0.35980500  0.11549100  2.09858300
C       0.89150600  0.44273400  2.85362700
H       1.06034000  1.51794500  2.80089500
C      -1.39542400  1.14868300  2.38800200
H      -1.50208600  1.25373500  3.47631100
H      -2.34770800  0.79732800  1.99118600
C      -2.23364700 -1.65980300  2.25427600
C       2.74137400  0.43881200  1.14500800
C       4.09514600  0.78408600  1.08539700
C       4.57666900  1.49026500 -0.01495000
H       4.75245200  0.50491700  1.90235500
C       2.36027700  1.45446300 -0.91470700
C       3.68930000  1.84491400 -1.03222600
H       5.62563300  1.76523700 -0.07434900
H       1.63363900  1.67586500 -1.68618600
H       4.01518800  2.40225500 -1.90388800
C      -1.42774300  2.67309600  0.30314500
C      -2.14440800  3.78646400 -0.14983300
C      -1.19936400  1.91436200 -1.89001500
C      -2.38192200  3.95621100 -1.51106200
H      -2.50576000  4.51228700  0.57126700
C      -1.89093300  3.00344900 -2.40372100
H      -0.78998300  1.14333800 -2.53247300
H      -2.93705900  4.81883400 -1.86783500
H      -2.03983100  3.09359800 -3.47439900
C      -2.71764700 -1.67788800  0.82533600
C      -3.98477700 -2.22216500  0.56677200
C      -4.46918400 -2.27061500 -0.73312400
H      -4.57123400 -2.60421700  1.39688000
C      -2.42115100 -1.25694900 -1.43692900
C      -3.66263200 -1.78005400 -1.76320900
H      -5.44981200 -2.68814200 -0.94229300
H      -1.74344800 -0.88533500 -2.19402400
H      -3.98414100 -1.80207900 -2.79914200
N      -1.94984000 -1.18985500 -0.16924500
N       1.89872400  0.76294400  0.14279900
N      -0.97770600  1.74421000 -0.57002100
C      -0.79162300 -1.25712500  2.53190400
H      -0.64288700 -1.34411700  3.61603700
H      -0.11477100 -1.96972900  2.05093600
H      -2.92618800 -1.05543000  2.85137900
H      -2.33759800 -2.67823300  2.64978100
C      -1.10343000  2.52425900  1.76979500
H      -0.05317000  2.80330400  1.91335900
H      -1.68964700  3.26180700  2.32527000

```

|   |             |             |             |
|---|-------------|-------------|-------------|
| H | 0.73002000  | 0.19169100  | 3.90919600  |
| C | 2.14690800  | -0.27057400 | 2.33374200  |
| H | 1.92051700  | -1.31016100 | 2.07031800  |
| H | 2.88721700  | -0.30455500 | 3.13785000  |
| O | 0.38345600  | -0.62648900 | -1.87735300 |
| C | 2.39869500  | -1.44698700 | -2.35346400 |
| C | 0.99686900  | -1.88851400 | -2.12308800 |
| C | 0.83162100  | -2.81576800 | -0.95583000 |
| C | 1.86425800  | -3.10591000 | -0.11792600 |
| C | 3.15729100  | -2.56134800 | -0.38219100 |
| C | 3.42711800  | -1.74052800 | -1.48213900 |
| H | 2.55078700  | -0.78148200 | -3.19698300 |
| H | -0.16475400 | -3.20695300 | -0.77754000 |
| H | 1.72529600  | -3.73509700 | 0.75481500  |
| H | 3.96015600  | -2.78082900 | 0.31674300  |

**t19**

E (SMD/B3LYP-D3/BS1) = -1512.04167438 au

G (SMD/B3LYP-D3/BS1) = -1511.573572 au

E (SMD/B3LYP-D3/BS2//SMD/B3LYP-D3/BS1) = -2849.96391708 au

charge = 2      spin multiplicity = 3

|    |             |             |             |
|----|-------------|-------------|-------------|
| Ni | -0.30402100 | 0.04177500  | -0.11719900 |
| N  | -1.22065600 | -0.28209800 | -1.98178200 |
| C  | -0.52096900 | -1.32835300 | -2.81199600 |
| H  | -1.02601300 | -2.28267200 | -2.66189900 |
| C  | -2.64330200 | -0.70096200 | -1.78801500 |
| H  | -3.06133100 | -0.96738600 | -2.76726300 |
| H  | -3.20506100 | 0.15162100  | -1.40803800 |
| C  | -1.88311300 | 2.22168400  | -2.14168200 |
| C  | 1.22057100  | -2.28031900 | -1.23697200 |
| C  | 1.98505400  | -3.44953000 | -1.21477300 |
| C  | 2.16464600  | -4.13625200 | -0.01543700 |
| H  | 2.42900400  | -3.81152800 | -2.13624200 |
| C  | 0.81355500  | -2.47962900 | 1.05274200  |
| C  | 1.56362900  | -3.64522200 | 1.14416800  |
| H  | 2.76002200  | -5.04407300 | 0.01179000  |
| H  | 0.32715400  | -2.05063500 | 1.92184300  |
| H  | 1.67120800  | -4.14749200 | 2.09941000  |
| C  | -2.84226300 | -1.47102900 | 0.64408600  |
| C  | -3.81968500 | -1.95803900 | 1.51751700  |
| C  | -1.84938600 | -0.28796800 | 2.38979000  |
| C  | -3.79163400 | -1.59621100 | 2.86178100  |
| H  | -4.59189900 | -2.61674900 | 1.13402100  |
| C  | -2.78312800 | -0.74262100 | 3.31111300  |
| H  | -1.04405400 | 0.37339300  | 2.68900700  |
| H  | -4.54535000 | -1.97238000 | 3.54714200  |
| H  | -2.71670000 | -0.43225300 | 4.34818000  |

|   |             |             |             |
|---|-------------|-------------|-------------|
| C | -1.37242600 | 2.84115600  | -0.86413000 |
| C | -1.53287100 | 4.21836700  | -0.65754500 |
| C | -1.08506300 | 4.80413000  | 0.52074300  |
| H | -2.00527600 | 4.81605000  | -1.43046800 |
| C | -0.32990100 | 2.64705900  | 1.20793300  |
| C | -0.46130000 | 4.00025200  | 1.47761400  |
| H | -1.20834800 | 5.87030600  | 0.68642300  |
| H | 0.16981200  | 1.98552900  | 1.90697000  |
| H | -0.07877700 | 4.40815500  | 2.40689300  |
| N | -0.78750400 | 2.07169900  | 0.07490400  |
| N | 0.65072700  | -1.81063400 | -0.10373100 |
| N | -1.87426000 | -0.64068400 | 1.08891200  |
| C | -1.13683600 | 1.01812700  | -2.72607300 |
| H | -1.53730200 | 0.85567800  | -3.73515800 |
| H | -0.07326200 | 1.25346200  | -2.82156600 |
| H | -2.94861300 | 1.99643100  | -2.01686300 |
| H | -1.84749100 | 2.99340100  | -2.91818200 |
| C | -2.82716000 | -1.87098500 | -0.80898400 |
| H | -2.04690300 | -2.62837100 | -0.95163500 |
| H | -3.77634400 | -2.36042000 | -1.04405600 |
| H | -0.64993400 | -1.06383500 | -3.86721100 |
| C | 0.97139300  | -1.51637600 | -2.51321300 |
| H | 1.47463400  | -0.54563400 | -2.47090400 |
| H | 1.40896200  | -2.07209300 | -3.34747000 |
| O | 1.61538100  | 0.86182400  | -0.71497700 |
| C | 2.65744700  | 0.46249200  | 1.37634300  |
| C | 2.64978500  | 0.87157500  | -0.00485900 |
| C | 3.94512900  | 1.33148500  | -0.62636800 |
| C | 5.15034900  | 1.31473300  | 0.25315500  |
| C | 5.08254300  | 0.90809800  | 1.53796700  |
| C | 3.81701000  | 0.48250700  | 2.09523300  |
| H | 1.71981200  | 0.14358900  | 1.82136900  |
| H | 4.12537500  | 0.71180100  | -1.51885500 |
| H | 3.78958400  | 2.34420300  | -1.02962800 |
| H | 6.08778600  | 1.64580500  | -0.18526200 |
| H | 5.96191500  | 0.89675700  | 2.17410500  |
| H | 3.79633100  | 0.16806000  | 3.13598100  |

**TS<sub>19-8</sub>**

E (SMD/B3LYP-D3/BS1) = -1741.33343821 au

G (SMD/B3LYP-D3/BS1) = -1740.798022 au

E (SMD/B3LYP-D3/BS2//SMD/B3LYP-D3/BS1) = -3079.39924736 au

negative eigenvalue of the frequency: 1171i

charge = 2      spin multiplicity = 3

|   |             |            |             |
|---|-------------|------------|-------------|
| O | -1.42950600 | 0.24471000 | -0.58033500 |
| C | -3.16708900 | 1.83944500 | -0.78112600 |
| C | -2.15163900 | 1.17365800 | -0.03696000 |

|    |             |             |             |
|----|-------------|-------------|-------------|
| C  | -2.04030600 | 1.49246200  | 1.37039900  |
| C  | -2.72726100 | 2.64601500  | 1.88718700  |
| C  | -3.66465600 | 3.29980900  | 1.12451200  |
| C  | -3.88359400 | 2.87374300  | -0.21155500 |
| H  | -3.32246300 | 1.55057300  | -1.81642000 |
| H  | -2.92473800 | 0.53794300  | 1.77686900  |
| H  | -1.13912100 | 1.15045500  | 1.88193400  |
| H  | -2.54084600 | 2.94162400  | 2.91606700  |
| H  | -4.22911200 | 4.13533800  | 1.52582600  |
| H  | -4.63031200 | 3.38802100  | -0.81193300 |
| O  | -3.76329200 | -0.37399800 | 2.17112300  |
| H  | -3.31147600 | -0.92772800 | 2.83827100  |
| H  | -4.00230000 | -0.99646500 | 1.38493500  |
| O  | -4.40672600 | -1.95547000 | 0.23394200  |
| H  | -4.13167600 | -2.85766100 | 0.47435900  |
| H  | -3.91616500 | -1.76402600 | -0.61680800 |
| O  | -2.96348300 | -1.45948100 | -1.98205400 |
| H  | -2.45373600 | -2.27550200 | -2.13048700 |
| H  | -2.31709300 | -0.82840800 | -1.57223500 |
| Ni | 0.58790500  | -0.17397300 | -0.09267600 |
| N  | 1.54859400  | -0.53333500 | -1.95029400 |
| C  | 1.54244500  | 0.67971000  | -2.84744300 |
| H  | 2.49580300  | 1.19652500  | -2.73344000 |
| C  | 2.96675700  | -0.95230100 | -1.72517000 |
| H  | 3.46819000  | -1.00767900 | -2.69993500 |
| H  | 2.96535500  | -1.95381200 | -1.29625200 |
| C  | 0.69872500  | -2.98472900 | -1.95414300 |
| C  | 0.65952200  | 2.53240900  | -1.36767900 |
| C  | 0.66629000  | 3.92803200  | -1.42677600 |
| C  | 0.92988300  | 4.66751600  | -0.27498400 |
| H  | 0.46741700  | 4.42135600  | -2.37251800 |
| C  | 1.17981300  | 2.60548000  | 0.90642900  |
| C  | 1.19902500  | 3.99462000  | 0.91737200  |
| H  | 0.93158300  | 5.75300500  | -0.30973400 |
| H  | 1.37560400  | 2.02878500  | 1.80396600  |
| H  | 1.41575700  | 4.52740600  | 1.83698600  |
| C  | 3.55105900  | -0.30752500 | 0.67917400  |
| C  | 4.63546800  | -0.39756100 | 1.55766400  |
| C  | 2.07224000  | -0.67983800 | 2.44075000  |
| C  | 4.41352100  | -0.62806100 | 2.91279900  |
| H  | 5.64253000  | -0.28451600 | 1.16987400  |
| C  | 3.10200800  | -0.77142900 | 3.36758000  |
| H  | 1.03675100  | -0.77721200 | 2.74601000  |
| H  | 5.24976600  | -0.69643800 | 3.60230200  |
| H  | 2.87589800  | -0.95020400 | 4.41320300  |
| C  | -0.16779300 | -3.11111700 | -0.72499800 |
| C  | -0.92795900 | -4.27164700 | -0.52225800 |

|   |             |             |             |
|---|-------------|-------------|-------------|
| C | -1.69561800 | -4.40883100 | 0.63055500  |
| H | -0.90581400 | -5.05644000 | -1.27138300 |
| C | -0.95029400 | -2.23748100 | 1.28633000  |
| C | -1.70584500 | -3.36786700 | 1.56228700  |
| H | -2.28122000 | -5.30798900 | 0.79701700  |
| H | -0.94805700 | -1.38404700 | 1.95659000  |
| H | -2.29214800 | -3.42157600 | 2.47369800  |
| N | -0.18854000 | -2.11318700 | 0.18133400  |
| N | 0.90827500  | 1.89346200  | -0.20193100 |
| N | 2.28594500  | -0.45423500 | 1.12898100  |
| C | 0.78593100  | -1.61876700 | -2.64856600 |
| H | 1.25555800  | -1.78660600 | -3.62696700 |
| H | -0.22084000 | -1.23122500 | -2.82836500 |
| H | 1.69932200  | -3.36072800 | -1.71106600 |
| H | 0.30807900  | -3.67633300 | -2.70742800 |
| C | 3.75750400  | -0.02797400 | -0.78727300 |
| H | 3.51356500  | 1.02350000  | -0.97940800 |
| H | 4.82016900  | -0.14399700 | -1.01703400 |
| H | 1.49141900  | 0.33288900  | -3.88505000 |
| C | 0.41014200  | 1.68088000  | -2.58733800 |
| H | -0.54301800 | 1.15403700  | -2.48207900 |
| H | 0.33050800  | 2.33143800  | -3.46306200 |

qnt20

E (SMD/B3LYP-D3/BS1) = -2560.24771003 au

G (SMD/B3LYP-D3/BS1) = -2559.459710 au

E (SMD/B3LYP-D3/BS2//SMD/B3LYP-D3/BS1) = -5235.91778564 au

charge = 3 spin multiplicity = 5

|    |            |             |             |
|----|------------|-------------|-------------|
| Ni | 2.11555800 | 0.21801500  | 0.37856900  |
| N  | 3.70806400 | 1.16259600  | 1.32324400  |
| C  | 4.34100400 | 0.29942300  | 2.37197600  |
| H  | 5.11039000 | -0.31245700 | 1.90089800  |
| C  | 4.73587100 | 1.58736300  | 0.32889600  |
| H  | 5.58128500 | 2.03955900  | 0.86535900  |
| H  | 4.29525400 | 2.35617500  | -0.30589600 |
| C  | 2.64732900 | 3.51440600  | 1.14170500  |
| C  | 3.03905700 | -1.87452100 | 2.32704600  |
| C  | 3.22677700 | -3.15120000 | 2.86346100  |
| C  | 2.93393900 | -4.27553900 | 2.09302900  |
| H  | 3.60314000 | -3.25268900 | 3.87624900  |
| C  | 2.30838400 | -2.80045900 | 0.31917200  |
| C  | 2.46488100 | -4.09881100 | 0.79163600  |
| H  | 3.07415200 | -5.27225500 | 2.50103900  |
| H  | 1.94330700 | -2.61205400 | -0.68347800 |
| H  | 2.22060900 | -4.94000500 | 0.15250300  |
| C  | 4.35546700 | 0.05179600  | -1.71776500 |
| C  | 4.88311800 | -0.15278700 | -2.99895100 |

|    |             |             |             |
|----|-------------|-------------|-------------|
| C  | 2.26204300  | -0.63905800 | -2.46096700 |
| C  | 4.06474100  | -0.61828000 | -4.02425700 |
| H  | 5.93443700  | 0.04907600  | -3.17666300 |
| C  | 2.72206300  | -0.88001100 | -3.74763200 |
| H  | 1.22857500  | -0.83282600 | -2.19530600 |
| H  | 4.46874800  | -0.77928500 | -5.01940300 |
| H  | 2.04308300  | -1.25909500 | -4.50389600 |
| C  | 1.63769800  | 3.28597700  | 0.04180700  |
| C  | 1.02301300  | 4.40843100  | -0.53478600 |
| C  | 0.09718500  | 4.25050800  | -1.55760300 |
| H  | 1.27932600  | 5.39587700  | -0.16377000 |
| C  | 0.42515600  | 1.89556600  | -1.36200900 |
| C  | -0.21278500 | 2.95667600  | -1.98330700 |
| H  | -0.38318700 | 5.11470700  | -2.00634400 |
| H  | 0.19012400  | 0.87466600  | -1.63329200 |
| H  | -0.94063600 | 2.76855700  | -2.76499900 |
| N  | 1.34078700  | 2.04300700  | -0.38182800 |
| N  | 2.58333000  | -1.71489300 | 1.06403200  |
| N  | 3.04801500  | -0.17320600 | -1.46829100 |
| C  | 3.09439700  | 2.34315600  | 2.01457400  |
| H  | 3.82536700  | 2.74696200  | 2.72763700  |
| H  | 2.24357300  | 1.96771200  | 2.58745800  |
| H  | 3.51808500  | 4.01868600  | 0.70601500  |
| H  | 2.21628500  | 4.24831200  | 1.83370900  |
| C  | 5.25759300  | 0.46596400  | -0.58040300 |
| H  | 5.49703400  | -0.43259100 | 0.00116900  |
| H  | 6.20584400  | 0.80972600  | -1.00386200 |
| H  | 4.84699800  | 0.95212100  | 3.09377100  |
| C  | 3.36577400  | -0.62962100 | 3.11089300  |
| H  | 2.43781300  | -0.10096100 | 3.35317900  |
| H  | 3.82852500  | -0.91926200 | 4.05867500  |
| O  | 0.67011700  | 0.22932500  | 1.79467600  |
| O  | -0.14439400 | -0.42033300 | 0.73541700  |
| H  | -0.08230600 | -1.35764900 | 0.99903800  |
| Ni | -2.15953900 | -0.08228200 | -0.17877600 |
| N  | -3.72524700 | 0.01093700  | -1.61399000 |
| C  | -3.35428900 | -0.73421400 | -2.87001100 |
| H  | -3.75837900 | -1.74564700 | -2.80530000 |
| C  | -4.98655500 | -0.57131200 | -1.05717700 |
| H  | -5.68450100 | -0.73934600 | -1.88677100 |
| H  | -5.44138900 | 0.16060600  | -0.39137500 |
| C  | -4.33048600 | 2.40864600  | -0.90889800 |
| C  | -1.28220100 | -1.96626800 | -2.30831500 |
| C  | -0.65945300 | -3.07208400 | -2.89053600 |
| C  | -0.33883100 | -4.17415000 | -2.09971500 |
| H  | -0.45281200 | -3.06629100 | -3.95551600 |
| C  | -1.26817600 | -3.01259100 | -0.22649400 |

|   |             |             |             |
|---|-------------|-------------|-------------|
| C | -0.67242800 | -4.15523500 | -0.74440300 |
| H | 0.14547400  | -5.04156100 | -2.53768300 |
| H | -1.54712300 | -2.95134500 | 0.82112800  |
| H | -0.46618400 | -4.99799100 | -0.09479400 |
| C | -4.29792100 | -1.68889600 | 1.13996300  |
| C | -4.95457900 | -2.29059800 | 2.21757100  |
| C | -2.71768600 | -0.77303100 | 2.60103500  |
| C | -4.46560600 | -2.12440700 | 3.51105000  |
| H | -5.84224100 | -2.88570200 | 2.03066000  |
| C | -3.32104500 | -1.35076200 | 3.70929100  |
| H | -1.81899700 | -0.17369400 | 2.69578400  |
| H | -4.97002200 | -2.59186700 | 4.35137400  |
| H | -2.89993200 | -1.19595700 | 4.69670000  |
| C | -3.26664200 | 2.80231400  | 0.07949300  |
| C | -3.30256400 | 4.09797200  | 0.60972100  |
| C | -2.36692900 | 4.49726300  | 1.55609500  |
| H | -4.07338900 | 4.78131700  | 0.26831100  |
| C | -1.40013000 | 2.31537300  | 1.37635100  |
| C | -1.39267600 | 3.58073900  | 1.94615700  |
| H | -2.39222900 | 5.50121100  | 1.96942900  |
| H | -0.62984400 | 1.59820300  | 1.63991400  |
| H | -0.62557100 | 3.83300000  | 2.67060000  |
| N | -2.31785100 | 1.91576600  | 0.46296700  |
| N | -1.54373600 | -1.93167200 | -0.98283600 |
| N | -3.19430800 | -0.93493700 | 1.34971500  |
| C | -3.94317300 | 1.43586300  | -2.01595000 |
| H | -4.74106400 | 1.45568900  | -2.77014800 |
| H | -3.02119600 | 1.77316400  | -2.49754900 |
| H | -5.20288200 | 2.04601500  | -0.35299400 |
| H | -4.67209600 | 3.31986400  | -1.41055900 |
| C | -4.78867600 | -1.87702700 | -0.27502100 |
| H | -4.10179300 | -2.54392900 | -0.80831100 |
| H | -5.75307400 | -2.39054600 | -0.23672700 |
| H | -3.84612100 | -0.24554000 | -3.71733900 |
| C | -1.83818700 | -0.82292500 | -3.11329400 |
| H | -1.35472900 | 0.12546300  | -2.84893300 |
| H | -1.65026000 | -0.99367900 | -4.17628000 |

t<sup>2</sup>

E (SMD/B3LYP-D3/BS1) = -2559.76084642 au

G (SMD/B3LYP-D3/BS1) = -2558.990650 au

E (SMD/B3LYP-D3/BS2//SMD/B3LYP-D3/BS1) = -5235.43335161 au

charge = 2      spin multiplicity = 3

|    |            |             |            |
|----|------------|-------------|------------|
| Ni | 1.82215500 | -0.00154300 | 0.25192400 |
| N  | 3.09949900 | 0.25202500  | 2.04218300 |
| C  | 3.12226100 | -0.97594100 | 2.90090000 |
| H  | 3.98894700 | -1.57825500 | 2.62477900 |

|   |             |             |             |
|---|-------------|-------------|-------------|
| C | 4.48547400  | 0.60882500  | 1.63250000  |
| H | 5.13000900  | 0.64275900  | 2.52252600  |
| H | 4.46813100  | 1.60896600  | 1.19978200  |
| C | 2.62724900  | 2.78400900  | 2.34765400  |
| C | 1.93633500  | -2.77537800 | 1.60131800  |
| C | 1.97339400  | -4.16764300 | 1.72462500  |
| C | 2.09600900  | -4.95324600 | 0.57942600  |
| H | 1.90735700  | -4.62033000 | 2.70885600  |
| C | 2.13266200  | -2.93856000 | -0.70987100 |
| C | 2.17661500  | -4.32896100 | -0.66621300 |
| H | 2.12324800  | -6.03628700 | 0.65775500  |
| H | 2.18613100  | -2.39670700 | -1.64830100 |
| H | 2.26338200  | -4.90030400 | -1.58430900 |
| C | 4.73815700  | -0.06665600 | -0.84629600 |
| C | 5.72944500  | 0.01951800  | -1.83119700 |
| C | 3.08661000  | 0.23037500  | -2.46211400 |
| C | 5.37004000  | 0.21193700  | -3.16317500 |
| H | 6.77255100  | -0.07052700 | -1.54554000 |
| C | 4.01718500  | 0.31185900  | -3.49081000 |
| H | 2.02107300  | 0.29367200  | -2.65574900 |
| H | 6.13340600  | 0.27818800  | -3.93308900 |
| H | 3.68608500  | 0.44987000  | -4.51466500 |
| C | 2.11672600  | 3.18943600  | 0.98432400  |
| C | 2.10883400  | 4.55460300  | 0.65592100  |
| C | 1.59273300  | 4.96898200  | -0.56524000 |
| H | 2.49610000  | 5.27371100  | 1.37166600  |
| C | 1.11860900  | 2.67549600  | -1.04418500 |
| C | 1.07283600  | 4.00601000  | -1.43502100 |
| H | 1.57771000  | 6.02272700  | -0.82859200 |
| H | 0.69310300  | 1.88429400  | -1.64833500 |
| H | 0.63244000  | 4.27805700  | -2.38853600 |
| N | 1.64749300  | 2.26719300  | 0.12809500  |
| N | 2.02180900  | -2.18416900 | 0.39334600  |
| N | 3.43412100  | 0.05516800  | -1.17319700 |
| C | 2.44089900  | 1.34519500  | 2.82731400  |
| H | 2.82620800  | 1.31979100  | 3.85617200  |
| H | 1.37497200  | 1.10170100  | 2.87005000  |
| H | 3.67771000  | 3.08417000  | 2.43668400  |
| H | 2.09877100  | 3.40307500  | 3.08460500  |
| C | 5.10070000  | -0.34654600 | 0.59332400  |
| H | 4.82645200  | -1.38450800 | 0.81635600  |
| H | 6.18873000  | -0.28904600 | 0.69028100  |
| H | 3.27180800  | -0.67037800 | 3.94391000  |
| C | 1.86351200  | -1.85696400 | 2.79332400  |
| H | 0.96728700  | -1.23075900 | 2.71414700  |
| H | 1.77628500  | -2.45198300 | 3.70724500  |
| O | -0.20458800 | -0.24566200 | 0.69348600  |



|    |             |             |             |
|----|-------------|-------------|-------------|
| Ni | -1.91234800 | -0.11656500 | -0.31094800 |
| N  | -3.17818600 | 0.04246800  | -2.00868100 |
| C  | -3.14544700 | -1.18625600 | -2.86539600 |
| H  | -3.92211400 | -1.87018300 | -2.52151300 |
| C  | -4.58261000 | 0.31992300  | -1.59559600 |
| H  | -5.22735900 | 0.31793400  | -2.48614400 |
| H  | -4.62120800 | 1.31942100  | -1.16283900 |
| C  | -2.86740500 | 2.58750800  | -2.32521500 |
| C  | -1.67525400 | -2.82239500 | -1.64663400 |
| C  | -1.40320400 | -4.18997800 | -1.74455300 |
| C  | -1.32425800 | -4.95679300 | -0.58321500 |
| H  | -1.25429600 | -4.63806600 | -2.72189200 |
| C  | -1.78998600 | -2.97183500 | 0.66763900  |
| C  | -1.52350700 | -4.33736600 | 0.65132400  |
| H  | -1.10676000 | -6.01942000 | -0.64047200 |
| H  | -1.93821200 | -2.43635400 | 1.59826400  |
| H  | -1.46478000 | -4.89178300 | 1.58185100  |
| C  | -4.74312600 | -0.40579100 | 0.87394600  |
| C  | -5.69822200 | -0.41361600 | 1.89806700  |
| C  | -3.05000400 | -0.06843400 | 2.43162700  |
| C  | -5.29759600 | -0.24675900 | 3.22137200  |
| H  | -6.74475600 | -0.55657400 | 1.64848400  |
| C  | -3.94010200 | -0.07943600 | 3.49856400  |
| H  | -1.98324600 | 0.04631900  | 2.58829900  |
| H  | -6.03122300 | -0.25299500 | 4.02243300  |
| H  | -3.57471200 | 0.03993100  | 4.51314400  |
| C  | -2.38991400 | 2.98136500  | -0.94806200 |
| C  | -2.46708500 | 4.33431100  | -0.58278200 |
| C  | -1.98245100 | 4.74717500  | 0.65123900  |
| H  | -2.89418300 | 5.04649400  | -1.28261900 |
| C  | -1.36844200 | 2.47384700  | 1.06612400  |
| C  | -1.40600700 | 3.79299100  | 1.49366700  |
| H  | -2.03345600 | 5.79198000  | 0.94392400  |
| H  | -0.88899600 | 1.70017300  | 1.64980200  |
| H  | -0.98300300 | 4.06315300  | 2.45555900  |
| N  | -1.87100000 | 2.06033300  | -0.11692500 |
| N  | -1.86956300 | -2.23512800 | -0.45013000 |
| N  | -3.43636300 | -0.21580200 | 1.15022000  |
| C  | -2.60455100 | 1.16702700  | -2.81589400 |
| H  | -3.01028000 | 1.11325800  | -3.83566300 |
| H  | -1.52691300 | 0.99244500  | -2.87920200 |
| H  | -3.93032800 | 2.83792700  | -2.41915100 |
| H  | -2.36067300 | 3.24480700  | -3.04411000 |
| C  | -5.14716500 | -0.66383300 | -0.55782100 |
| H  | -4.86783400 | -1.69450900 | -0.80755200 |
| H  | -6.23853900 | -0.62032600 | -0.62136800 |
| H  | -3.40708600 | -0.90119300 | -3.89227900 |

|   |             |             |             |
|---|-------------|-------------|-------------|
| C | -1.80381100 | -1.93517500 | -2.85614800 |
| H | -0.96757200 | -1.22685600 | -2.87022000 |
| H | -1.73777400 | -2.54298400 | -3.76348200 |
| O | 0.08475200  | -0.20421900 | -0.78913800 |

qnt2

E (SMD/B3LYP-D3/BS1) = -2559.78127608 au

G (SMD/B3LYP-D3/BS1) = -2559.009589 au

E (SMD/B3LYP-D3/BS2//SMD/B3LYP-D3/BS1) = -5235.44916793 au

charge = 2 spin multiplicity = 5

|    |            |             |             |
|----|------------|-------------|-------------|
| Ni | 1.77344600 | -0.12469700 | 0.29934400  |
| N  | 3.06537300 | 0.32530900  | 2.01575400  |
| C  | 3.06284800 | -0.79121900 | 3.01572500  |
| H  | 3.88541000 | -1.46766500 | 2.78048500  |
| C  | 4.46017400 | 0.60289600  | 1.57387700  |
| H  | 5.09815400 | 0.73626600  | 2.45943700  |
| H  | 4.46300600 | 1.54232200  | 1.02097500  |
| C  | 2.63402200 | 2.87828000  | 1.98518300  |
| C  | 1.71241000 | -2.67711500 | 2.00298600  |
| C  | 1.46371100 | -4.02085400 | 2.29725000  |
| C  | 1.44737400 | -4.95601000 | 1.26219000  |
| H  | 1.28528800 | -4.32176400 | 3.32488700  |
| C  | 1.93310800 | -3.17345900 | -0.25714600 |
| C  | 1.69081600 | -4.52786400 | -0.04364500 |
| H  | 1.24899400 | -6.00317400 | 1.47255600  |
| H  | 2.11435500 | -2.77846400 | -1.25103800 |
| H  | 1.68507200 | -5.21937100 | -0.87956900 |
| C  | 4.69654500 | -0.41155200 | -0.79282200 |
| C  | 5.68146000 | -0.50167400 | -1.78419300 |
| C  | 3.03845000 | -0.34672900 | -2.42546200 |
| C  | 5.31497000 | -0.51835000 | -3.12777700 |
| H  | 6.72499100 | -0.56573500 | -1.49308000 |
| C  | 3.96111500 | -0.44996300 | -3.45930700 |
| H  | 1.97275000 | -0.29957700 | -2.62108600 |
| H  | 6.07302500 | -0.59011200 | -3.90243800 |
| H  | 3.62323900 | -0.47465000 | -4.48989400 |
| C  | 2.20992400 | 3.06981100  | 0.54749500  |
| C  | 2.36226900 | 4.34217200  | -0.02712000 |
| C  | 1.94771200 | 4.56741600  | -1.33357000 |
| H  | 2.80007900 | 5.14003600  | 0.56523900  |
| C  | 1.24319800 | 2.28634800  | -1.40905700 |
| C  | 1.36338000 | 3.51396200  | -2.04293600 |
| H  | 2.06407600 | 5.54734400  | -1.78750400 |
| H  | 0.77324800 | 1.43762100  | -1.88767500 |
| H  | 1.00246900 | 3.63912200  | -3.05831600 |
| N  | 1.67292300 | 2.05555400  | -0.15144000 |
| N  | 1.94354700 | -2.27660300 | 0.73801500  |

|    |             |             |             |
|----|-------------|-------------|-------------|
| N  | 3.39258000  | -0.31582200 | -1.12697700 |
| C  | 2.44060300  | 1.52188200  | 2.66323300  |
| H  | 2.84782600  | 1.62818000  | 3.67874100  |
| H  | 1.37459000  | 1.30408100  | 2.76025500  |
| H  | 3.67369100  | 3.20951300  | 2.08573900  |
| H  | 2.05255900  | 3.58908800  | 2.58727000  |
| C  | 5.06950500  | -0.48170200 | 0.66929000  |
| H  | 4.80544800  | -1.48076200 | 1.03609200  |
| H  | 6.15788800  | -0.40519600 | 0.74870600  |
| H  | 3.27405500  | -0.36872100 | 4.00634200  |
| C  | 1.75993200  | -1.60863700 | 3.06643200  |
| H  | 0.89310200  | -0.94811200 | 2.94469900  |
| H  | 1.67983200  | -2.07509600 | 4.05298200  |
| O  | -0.27932000 | -0.60692900 | 0.73494000  |
| Ni | -1.88797000 | -0.01046000 | -0.29515400 |
| N  | -3.03738400 | 0.60475600  | -1.98304200 |
| C  | -3.15228200 | -0.48028200 | -3.00981500 |
| H  | -4.02467600 | -1.08961700 | -2.77313800 |
| C  | -4.39910400 | 1.04666700  | -1.57164300 |
| H  | -4.98535900 | 1.28567900  | -2.47085600 |
| H  | -4.29833600 | 1.96333000  | -0.99014100 |
| C  | -2.27101800 | 3.07290100  | -1.88215300 |
| C  | -1.94260200 | -2.48179300 | -2.05172600 |
| C  | -1.74170500 | -3.83071000 | -2.35925200 |
| C  | -1.77404000 | -4.77774000 | -1.33627300 |
| H  | -1.56175500 | -4.12532400 | -3.38846300 |
| C  | -2.21040900 | -2.99372200 | 0.19627300  |
| C  | -2.01817800 | -4.35365900 | -0.02931100 |
| H  | -1.61314300 | -5.82938400 | -1.55614500 |
| H  | -2.38616300 | -2.60744700 | 1.19361200  |
| H  | -2.04983900 | -5.05311800 | 0.79941700  |
| C  | -4.79980000 | -0.02923400 | 0.74192500  |
| C  | -5.79358300 | -0.05261600 | 1.72842200  |
| C  | -3.15707700 | -0.27275800 | 2.36930400  |
| C  | -5.43986600 | -0.19433000 | 3.06770600  |
| H  | -6.83521000 | 0.03259100  | 1.43578700  |
| C  | -4.08982500 | -0.31962900 | 3.39776100  |
| H  | -2.09619900 | -0.37912300 | 2.56595200  |
| H  | -6.20467000 | -0.21443800 | 3.83881500  |
| H  | -3.76182600 | -0.44998400 | 4.42364500  |
| C  | -1.79082900 | 3.15424400  | -0.45247100 |
| C  | -1.61194300 | 4.42950600  | 0.10808300  |
| C  | -1.16824100 | 4.55766900  | 1.41721800  |
| H  | -1.81969200 | 5.30564800  | -0.49872400 |
| C  | -1.07347300 | 2.17282000  | 1.51844400  |
| C  | -0.88967100 | 3.39650400  | 2.14316500  |
| H  | -1.02835400 | 5.53982400  | 1.85951700  |

|   |             |             |             |
|---|-------------|-------------|-------------|
| H | -0.82028300 | 1.24523400  | 2.01116700  |
| H | -0.52169700 | 3.43467400  | 3.16287700  |
| N | -1.53225700 | 2.04070000  | 0.25537400  |
| N | -2.17472800 | -2.08251500 | -0.78654700 |
| N | -3.49484600 | -0.11666800 | 1.07465500  |
| C | -2.27229800 | 1.72863200  | -2.60704600 |
| H | -2.68251500 | 1.92053900  | -3.60908600 |
| H | -1.24754500 | 1.37571600  | -2.73747900 |
| H | -3.26378300 | 3.53460800  | -1.93768100 |
| H | -1.62250500 | 3.72698900  | -2.47869100 |
| C | -5.17404200 | 0.03043800  | -0.71947400 |
| H | -5.07553100 | -0.98054000 | -1.13315300 |
| H | -6.23585800 | 0.28402100  | -0.79222700 |
| H | -3.34426000 | -0.01442000 | -3.98515100 |
| C | -1.92823000 | -1.40444900 | -3.10534500 |
| H | -1.00284200 | -0.82538700 | -3.00598700 |
| H | -1.91766000 | -1.86643600 | -4.09722800 |
| O | 0.08118600  | -0.53606600 | -0.73804400 |

'2'

E (SMD/B3LYP-D3/BS1) = -2559.71265526 au

G (SMD/B3LYP-D3/BS1) = -2558.939216 au

E (SMD/B3LYP-D3/BS2//SMD/B3LYP-D3/BS1) = -5235.39779754 au

charge = 2 spin multiplicity = 1

|    |            |             |             |
|----|------------|-------------|-------------|
| Ni | 2.12738600 | 0.11566200  | 0.02083800  |
| N  | 3.30637500 | -0.07407400 | 2.21948000  |
| C  | 2.77641200 | -1.23158100 | 2.97509400  |
| H  | 3.55339500 | -1.99945300 | 3.03578700  |
| C  | 4.76176600 | -0.19152300 | 2.06153300  |
| H  | 5.23264000 | -0.55969400 | 2.98714700  |
| H  | 5.19767100 | 0.78760400  | 1.86057100  |
| C  | 3.26659100 | 2.47809800  | 2.08464900  |
| C  | 1.76741800 | -2.56999400 | 1.06275100  |
| C  | 1.78962100 | -3.96780300 | 0.98813500  |
| C  | 2.03578600 | -4.60493100 | -0.22419100 |
| H  | 1.60273800 | -4.54292100 | 1.88895100  |
| C  | 2.23005500 | -2.44392700 | -1.22387200 |
| C  | 2.24793800 | -3.82517300 | -1.36130200 |
| H  | 2.04682200 | -5.68922600 | -0.28364300 |
| H  | 2.40146700 | -1.79419500 | -2.07380300 |
| H  | 2.42344900 | -4.26864000 | -2.33556100 |
| C  | 5.06413600 | -0.47545900 | -0.46074000 |
| C  | 6.21761800 | -0.44837100 | -1.25641300 |
| C  | 3.89362800 | 0.63453500  | -2.14053100 |
| C  | 6.19463200 | 0.12792600  | -2.52149400 |
| H  | 7.12949200 | -0.89037600 | -0.86902000 |
| C  | 4.99854200 | 0.67965600  | -2.97810200 |

|    |             |             |             |
|----|-------------|-------------|-------------|
| H  | 2.94767900  | 1.04867400  | -2.46419300 |
| H  | 7.08882800  | 0.14275300  | -3.13759800 |
| H  | 4.91272600  | 1.13550500  | -3.95861400 |
| C  | 2.49499500  | 2.93664200  | 0.86665100  |
| C  | 2.29884000  | 4.31535100  | 0.69261100  |
| C  | 1.64594300  | 4.80163400  | -0.43415600 |
| H  | 2.66959800  | 4.99653500  | 1.45172800  |
| C  | 1.37013400  | 2.53731900  | -1.13799500 |
| C  | 1.16372900  | 3.88887700  | -1.37119500 |
| H  | 1.49992500  | 5.86945100  | -0.56818500 |
| H  | 0.97024300  | 1.78642500  | -1.80568300 |
| H  | 0.62190800  | 4.20622700  | -2.25562000 |
| N  | 2.04183300  | 2.06685900  | -0.06266800 |
| N  | 2.01325900  | -1.82750900 | -0.04469700 |
| N  | 3.90908200  | 0.08069800  | -0.90773000 |
| C  | 2.85453800  | 1.19174500  | 2.82126900  |
| H  | 3.23519500  | 1.27825800  | 3.85479100  |
| H  | 1.76214500  | 1.14538100  | 2.87907300  |
| H  | 4.32703800  | 2.43745400  | 1.81004000  |
| H  | 3.19875000  | 3.28731000  | 2.81872200  |
| C  | 5.12596400  | -1.12941600 | 0.89709200  |
| H  | 4.47292900  | -2.00858300 | 0.91098000  |
| H  | 6.14639500  | -1.49430700 | 1.04672100  |
| H  | 2.55553300  | -0.93256400 | 4.01064700  |
| C  | 1.51229800  | -1.86943900 | 2.37049700  |
| H  | 0.74728100  | -1.10660700 | 2.21078100  |
| H  | 1.13022900  | -2.60154500 | 3.08960100  |
| O  | 0.39673000  | 0.19050700  | 0.63702000  |
| Ni | -2.10717700 | 0.07717300  | -0.02023700 |
| N  | -3.45234800 | -0.28937600 | -2.18886500 |
| C  | -2.75396200 | -1.31698500 | -2.99170800 |
| H  | -3.39901500 | -2.19734400 | -3.07310300 |
| C  | -4.85208700 | -0.67338500 | -1.95903700 |
| H  | -5.26522100 | -1.19883600 | -2.83362100 |
| H  | -5.47060500 | 0.21455400  | -1.81969600 |
| C  | -3.82371000 | 2.20326300  | -1.86838600 |
| C  | -1.51892600 | -2.52058400 | -1.12223400 |
| C  | -1.36909500 | -3.91162200 | -1.07635600 |
| C  | -1.50903200 | -4.59511400 | 0.12795900  |
| H  | -1.13505400 | -4.44395500 | -1.99234200 |
| C  | -1.94123500 | -2.49326500 | 1.17741500  |
| C  | -1.79329200 | -3.86920200 | 1.28496800  |
| H  | -1.38496100 | -5.67325700 | 0.16537900  |
| H  | -2.17129400 | -1.88245600 | 2.04257500  |
| H  | -1.89547100 | -4.34991800 | 2.25188000  |
| C  | -4.95930000 | -0.81604200 | 0.58747900  |
| C  | -6.08532100 | -0.85069600 | 1.42162700  |

|   |             |             |             |
|---|-------------|-------------|-------------|
| C | -3.87004800 | 0.54151500  | 2.13726000  |
| C | -6.08986200 | -0.17814300 | 2.63847200  |
| H | -6.95416800 | -1.41689400 | 1.10291000  |
| C | -4.94869600 | 0.53170500  | 3.00952600  |
| H | -2.96613300 | 1.08033800  | 2.39354900  |
| H | -6.96259900 | -0.21084900 | 3.28401700  |
| H | -4.88591100 | 1.06814000  | 3.95021000  |
| C | -2.89891500 | 2.80886000  | -0.84047100 |
| C | -2.81229400 | 4.20519800  | -0.73408300 |
| C | -2.02997000 | 4.78940100  | 0.25564000  |
| H | -3.37426300 | 4.82045100  | -1.42920700 |
| C | -1.39684800 | 2.58849100  | 0.93502500  |
| C | -1.30428300 | 3.96042000  | 1.11177900  |
| H | -1.97381900 | 5.87024900  | 0.34633000  |
| H | -0.79064800 | 1.89613900  | 1.50768400  |
| H | -0.65437500 | 4.36112100  | 1.88142700  |
| N | -2.19778400 | 2.02249100  | 0.00433900  |
| N | -1.82209200 | -1.83621500 | 0.00748100  |
| N | -3.86109300 | -0.10295400 | 0.94864300  |
| C | -3.28820900 | 1.05798600  | -2.75675900 |
| H | -3.79598000 | 1.12753400  | -3.73500500 |
| H | -2.21855600 | 1.20833600  | -2.93704500 |
| H | -4.72990700 | 1.88145900  | -1.34312500 |
| H | -4.14265600 | 3.01245300  | -2.53157800 |
| C | -4.99398200 | -1.57134500 | -0.71830900 |
| H | -4.21015800 | -2.33494300 | -0.73169000 |
| H | -5.95095200 | -2.09883200 | -0.77524400 |
| H | -2.59665300 | -0.95067600 | -4.01696900 |
| C | -1.39591900 | -1.76980900 | -2.42215800 |
| H | -0.74498500 | -0.90727500 | -2.26498600 |
| H | -0.92819000 | -2.42867400 | -3.16179700 |
| O | -0.37830000 | 0.29849000  | -0.59708500 |

t<sub>1</sub>

E (SMD/B3LYP-D3/BS1) = -2559.77074927 au

G (SMD/B3LYP-D3/BS1) = -2558.994695 au

E (SMD/B3LYP-D3/BS2//SMD/B3LYP-D3/BS1) = -5235.44386254 au

charge = 2      spin multiplicity = 3

|   |             |             |            |
|---|-------------|-------------|------------|
| N | -2.50156000 | 0.00915300  | 2.11378700 |
| C | -2.47652900 | 1.31451000  | 2.87307500 |
| H | -3.39799000 | 1.85659000  | 2.65962700 |
| C | -3.92572300 | -0.36745700 | 1.87927400 |
| H | -4.46377400 | -0.32293500 | 2.83553200 |
| H | -3.95781400 | -1.39752300 | 1.52731300 |
| C | -2.13665400 | -2.48781200 | 2.72645300 |
| C | -1.51568300 | 2.98051000  | 1.28214200 |
| C | -1.64022600 | 4.37298800  | 1.22747400 |

|   |             |             |             |
|---|-------------|-------------|-------------|
| C | -1.90642400 | 4.98957200  | 0.00712400  |
| H | -1.52782500 | 4.95513300  | 2.13658800  |
| C | -1.88796100 | 2.82128300  | -1.00205700 |
| C | -2.03159600 | 4.19781300  | -1.13583900 |
| H | -2.00691200 | 6.06950600  | -0.05286100 |
| H | -1.95492400 | 2.16296300  | -1.85896800 |
| H | -2.22538000 | 4.63210800  | -2.11110800 |
| C | -4.35481700 | 0.14726900  | -0.58769800 |
| C | -5.40187600 | 0.05122000  | -1.51184600 |
| C | -2.81076900 | -0.28432800 | -2.27148400 |
| C | -5.12932200 | -0.21975800 | -2.84915500 |
| H | -6.42157800 | 0.19654000  | -1.17046200 |
| C | -3.80040800 | -0.38256800 | -3.23996300 |
| H | -1.75818200 | -0.37431800 | -2.51337200 |
| H | -5.93694500 | -0.29563800 | -3.57144200 |
| H | -3.52768400 | -0.58005700 | -4.27127600 |
| C | -1.93513300 | -3.07000900 | 1.34856400  |
| C | -2.10178800 | -4.45350600 | 1.17515200  |
| C | -1.88330500 | -5.02193200 | -0.07314400 |
| H | -2.38884500 | -5.06428600 | 2.02612800  |
| C | -1.34529700 | -2.83389800 | -0.87344300 |
| C | -1.48368100 | -4.19200200 | -1.12468900 |
| H | -2.00443400 | -6.09111500 | -0.22256800 |
| H | -0.99275100 | -2.14783200 | -1.63103100 |
| H | -1.27097200 | -4.58699700 | -2.11267500 |
| N | -1.58547900 | -2.27277300 | 0.32700400  |
| N | -1.64887700 | 2.22529400  | 0.17607100  |
| N | -3.07415900 | -0.04057300 | -0.97166400 |
| C | -1.80280200 | -1.01757200 | 2.96832000  |
| H | -2.06006400 | -0.82227800 | 4.01599200  |
| H | -0.73413900 | -0.84099500 | 2.83728600  |
| H | -3.16022400 | -2.70621600 | 3.05402700  |
| H | -1.49438500 | -3.04904700 | 3.41830900  |
| C | -4.64235000 | 0.50705800  | 0.84551100  |
| H | -4.40005100 | 1.56711800  | 0.98676000  |
| H | -5.71840500 | 0.41403400  | 1.01691200  |
| H | -2.49414200 | 1.08079000  | 3.94203300  |
| C | -1.29005900 | 2.23642900  | 2.56785100  |
| H | -0.37253600 | 1.64609900  | 2.48514500  |
| H | -1.18526100 | 2.94658500  | 3.39348900  |
| N | 2.50526100  | 0.04809700  | -2.11211900 |
| C | 2.46017500  | 1.35349900  | -2.86998500 |
| H | 3.36994300  | 1.91240800  | -2.65013000 |
| C | 3.93514400  | -0.30656400 | -1.87799700 |
| H | 4.47206400  | -0.25333900 | -2.83445100 |
| H | 3.98329100  | -1.33609300 | -1.52636700 |
| C | 2.17911900  | -2.45372300 | -2.72670800 |

|    |             |             |             |
|----|-------------|-------------|-------------|
| C  | 1.46051100  | 3.00182200  | -1.28427800 |
| C  | 1.54726300  | 4.39709900  | -1.22883800 |
| C  | 1.79763700  | 5.01997400  | -0.00832400 |
| H  | 1.41830400  | 4.97648700  | -2.13752500 |
| C  | 1.83899400  | 2.85144300  | 0.99961200  |
| C  | 1.94609000  | 4.23123100  | 1.13393900  |
| H  | 1.86839900  | 6.10222400  | 0.05226700  |
| H  | 1.92447000  | 2.19466900  | 1.85606200  |
| H  | 2.12954700  | 4.67006100  | 2.10917700  |
| C  | 4.35599400  | 0.21491400  | 0.58899300  |
| C  | 5.40395900  | 0.13433600  | 1.51358100  |
| C  | 2.81766000  | -0.23836900 | 2.27239600  |
| C  | 5.13483000  | -0.14009400 | 2.85089700  |
| H  | 6.42162500  | 0.29414200  | 1.17257800  |
| C  | 3.80827100  | -0.32196000 | 3.24127000  |
| H  | 1.76633700  | -0.34374100 | 2.51379100  |
| H  | 5.94323400  | -0.20411700 | 3.57346900  |
| H  | 3.53805300  | -0.52304800 | 4.27254700  |
| C  | 1.98616800  | -3.03958700 | -1.34905200 |
| C  | 2.17269900  | -4.42061400 | -1.17635500 |
| C  | 1.96290200  | -4.99268700 | 0.07177900  |
| H  | 2.46810700  | -5.02683100 | -2.02774200 |
| C  | 1.39373800  | -2.81299900 | 0.87330500  |
| C  | 1.55184100  | -4.16907500 | 1.12390500  |
| H  | 2.09943100  | -6.06009500 | 0.22062200  |
| H  | 1.03154300  | -2.13242700 | 1.63133500  |
| H  | 1.34532900  | -4.56756800 | 2.11179900  |
| N  | 1.62534700  | -2.24798800 | -0.32698400 |
| N  | 1.61410200  | 2.25003600  | -0.17852500 |
| N  | 3.07802800  | 0.00858600  | 0.97255300  |
| C  | 1.82255500  | -0.98862000 | -2.96756400 |
| H  | 2.07670100  | -0.78821900 | -4.01502300 |
| H  | 0.75126100  | -0.82898600 | -2.83631000 |
| H  | 3.20603900  | -2.65620800 | -3.05413400 |
| H  | 1.54571000  | -3.02437000 | -3.41900500 |
| C  | 4.63876900  | 0.57838300  | -0.84422400 |
| H  | 4.38131900  | 1.63474800  | -0.98586300 |
| H  | 5.71606700  | 0.50072400  | -1.01538400 |
| H  | 2.48878900  | 1.12131000  | -3.93911400 |
| C  | 1.25499700  | 2.25292600  | -2.57068200 |
| H  | 0.34793500  | 1.64605900  | -2.49226300 |
| H  | 1.14098000  | 2.96079200  | -3.39703900 |
| Ni | -1.42304500 | 0.04973900  | 0.29036100  |
| O  | -0.23634700 | 0.03404300  | -1.12682600 |
| Ni | 1.42658100  | 0.07203600  | -0.28997100 |
| O  | 0.24029800  | 0.03843000  | 1.12705000  |



qnt<sub>1</sub>

E (SMD/B3LYP-D3/BS1) = -2559.76444585 au

G (SMD/B3LYP-D3/BS1) = -2558.990991 au

E (SMD/B3LYP-D3/BS2//SMD/B3LYP-D3/BS1) = -5235.43229982 au

charge = 2 spin multiplicity = 5

|    |            |             |             |
|----|------------|-------------|-------------|
| Ni | 1.47523400 | -0.00448600 | 0.27532800  |
| N  | 2.73131600 | -0.00725500 | 2.15677700  |
| C  | 2.74345600 | -1.32518500 | 2.87169200  |
| H  | 3.67031500 | -1.84853200 | 2.63194800  |
| C  | 4.12993300 | 0.41665300  | 1.88257100  |
| H  | 4.71466100 | 0.36544400  | 2.81270100  |
| H  | 4.12057900 | 1.45791700  | 1.56047100  |
| C  | 2.20379600 | 2.45952200  | 2.73383100  |
| C  | 1.75126200 | -2.92905100 | 1.21293300  |
| C  | 2.02150400 | -4.29807700 | 1.10529500  |
| C  | 2.25185400 | -4.85880500 | -0.14859900 |
| H  | 2.04901200 | -4.90728600 | 2.00298100  |
| C  | 1.92466400 | -2.68778100 | -1.09405300 |
| C  | 2.20164500 | -4.03709400 | -1.27619000 |
| H  | 2.46151900 | -5.92019500 | -0.24537500 |
| H  | 1.86499400 | -2.00418000 | -1.93209500 |
| H  | 2.36349700 | -4.42839400 | -2.27500200 |
| C  | 4.57296800 | 0.03175400  | -0.62577100 |
| C  | 5.64375900 | 0.26859500  | -1.49729700 |
| C  | 3.06176000 | 0.46326600  | -2.33549700 |
| C  | 5.39646700 | 0.60991500  | -2.82466100 |
| H  | 6.66018500 | 0.17620000  | -1.12788600 |
| C  | 4.07385700 | 0.69870500  | -3.25910300 |
| H  | 2.01490400 | 0.50070300  | -2.61394900 |
| H  | 6.22060200 | 0.79495000  | -3.50768700 |
| H  | 3.82551200 | 0.94440700  | -4.28643100 |
| C  | 1.90866100 | 3.02330600  | 1.36240300  |
| C  | 2.01930000 | 4.41379600  | 1.19518200  |
| C  | 1.73707900 | 4.99183800  | -0.03447600 |
| H  | 2.31936200 | 5.02344900  | 2.04216800  |
| C  | 1.25474800 | 2.79968600  | -0.84990600 |
| C  | 1.33694400 | 4.16270700  | -1.08632200 |
| H  | 1.81521500 | 6.06650300  | -0.17109800 |
| H  | 0.92549600 | 2.11894000  | -1.62414800 |
| H  | 1.08507000 | 4.56018500  | -2.06365600 |
| N  | 1.54323100 | 2.22941900  | 0.34057700  |
| N  | 1.70892800 | -2.14496600 | 0.11687900  |
| N  | 3.29637200 | 0.15142100  | -1.04694300 |
| C  | 2.00760300 | 0.97280200  | 3.02531100  |
| H  | 2.32891200 | 0.83178200  | 4.06707000  |
| H  | 0.94845800 | 0.70966200  | 2.96706000  |
| H  | 3.21985000 | 2.76511100  | 3.01046200  |

|    |             |             |             |
|----|-------------|-------------|-------------|
| H  | 1.55136700  | 2.98417000  | 3.44467900  |
| C  | 4.82967700  | -0.41384500 | 0.79281200  |
| H  | 4.54646900  | -1.47021700 | 0.87220900  |
| H  | 5.90713900  | -0.37091700 | 0.97616200  |
| H  | 2.76461100  | -1.13691400 | 3.95209800  |
| C  | 1.56138900  | -2.25173600 | 2.54253500  |
| H  | 0.63307000  | -1.67260000 | 2.53345100  |
| H  | 1.49095400  | -3.00926700 | 3.32904100  |
| O  | -0.32754300 | -0.06561900 | 1.32483400  |
| Ni | -1.55630300 | -0.08487500 | -0.29269500 |
| N  | -2.73426400 | -0.19065400 | -2.14713800 |
| C  | -2.58853200 | -1.50294100 | -2.86189900 |
| H  | -3.44165600 | -2.13618200 | -2.61464500 |
| C  | -4.18102300 | 0.07327200  | -1.91598600 |
| H  | -4.72356800 | -0.04308600 | -2.86545000 |
| H  | -4.29675400 | 1.10967600  | -1.59809100 |
| C  | -2.44748400 | 2.31874000  | -2.69346200 |
| C  | -1.39416900 | -2.96762500 | -1.20672800 |
| C  | -1.39142700 | -4.36143000 | -1.08953800 |
| C  | -1.53030100 | -4.94832300 | 0.16599500  |
| H  | -1.27771500 | -4.96990300 | -1.98073100 |
| C  | -1.66665800 | -2.74867300 | 1.09337000  |
| C  | -1.67370800 | -4.12476300 | 1.28363800  |
| H  | -1.52245400 | -6.02928800 | 0.27092000  |
| H  | -1.75703800 | -2.06122300 | 1.92392800  |
| H  | -1.77714400 | -4.53292100 | 2.28342600  |
| C  | -4.62256400 | -0.35978600 | 0.57303000  |
| C  | -5.72002200 | -0.24242000 | 1.43524000  |
| C  | -3.18290300 | 0.23744700  | 2.28947600  |
| C  | -5.52334200 | 0.12708300  | 2.76310500  |
| H  | -6.71659600 | -0.44764000 | 1.05741800  |
| C  | -4.22155800 | 0.36226200  | 3.20494300  |
| H  | -2.14978800 | 0.38055500  | 2.58150700  |
| H  | -6.36778000 | 0.22052300  | 3.44000700  |
| H  | -4.00796400 | 0.63478700  | 4.23333300  |
| C  | -2.16491400 | 2.86988100  | -1.31515100 |
| C  | -2.35577700 | 4.24701600  | -1.11574500 |
| C  | -2.08958200 | 4.81587100  | 0.12175800  |
| H  | -2.70467400 | 4.85481200  | -1.94513200 |
| C  | -1.45664300 | 2.64200900  | 0.87875500  |
| C  | -1.61934800 | 3.99140200  | 1.14757900  |
| H  | -2.23121400 | 5.88060400  | 0.28294300  |
| H  | -1.06367000 | 1.96730100  | 1.62837200  |
| H  | -1.37248300 | 4.38273200  | 2.12856500  |
| N  | -1.73582000 | 2.07785900  | -0.31573900 |
| N  | -1.53073200 | -2.18211400 | -0.11905900 |
| N  | -3.36816300 | -0.09913100 | 0.99854000  |

|   |             |             |             |
|---|-------------|-------------|-------------|
| C | -2.12978300 | 0.86170600  | -3.02327100 |
| H | -2.47666000 | 0.70538500  | -4.05458800 |
| H | -1.05200500 | 0.69546400  | -2.99950700 |
| H | -3.49221200 | 2.54430900  | -2.93796700 |
| H | -1.86041600 | 2.91434500  | -3.40509900 |
| C | -4.81867600 | -0.82607600 | -0.84667000 |
| H | -4.43815200 | -1.85137800 | -0.92422900 |
| H | -5.89229400 | -0.88140800 | -1.04826200 |
| H | -2.64006500 | -1.31852600 | -3.94168400 |
| C | -1.30357300 | -2.28065200 | -2.54168500 |
| H | -0.44536900 | -1.60090600 | -2.55610100 |
| H | -1.15416600 | -3.03058800 | -3.32412500 |
| O | 0.19653100  | 0.01210200  | -1.27828800 |

sep1

E (SMD/B3LYP-D3/BS1) = -2559.7715374 au

G (SMD/B3LYP-D3/BS1) = -2558.998080 au

E (SMD/B3LYP-D3/BS2//SMD/B3LYP-D3/BS1) = -5235.43743712 au

charge = 2 spin multiplicity = 7

|    |            |             |             |
|----|------------|-------------|-------------|
| Ni | 1.72241200 | 0.13766000  | -0.28255500 |
| N  | 2.85998100 | -0.30384700 | -2.07395700 |
| C  | 2.75059300 | 0.78669900  | -3.09465600 |
| H  | 3.57387100 | 1.48485600  | -2.93956600 |
| C  | 4.29290100 | -0.54268500 | -1.75017800 |
| H  | 4.85609200 | -0.68123500 | -2.68408700 |
| H  | 4.36392600 | -1.47017500 | -1.18123900 |
| C  | 2.49148100 | -2.86392500 | -1.96551100 |
| C  | 1.45094000 | 2.64409600  | -2.00156100 |
| C  | 1.16124600 | 3.98257900  | -2.28254100 |
| C  | 1.22331500 | 4.92587600  | -1.25789900 |
| H  | 0.89401200 | 4.27314300  | -3.29368100 |
| C  | 1.85407400 | 3.16118300  | 0.22801700  |
| C  | 1.58194400 | 4.51041900  | 0.02523100  |
| H  | 0.99584200 | 5.96905000  | -1.45788000 |
| H  | 2.12508800 | 2.77768700  | 1.20580600  |
| H  | 1.64014400 | 5.20852100  | 0.85336300  |
| C  | 4.68571300 | 0.52642500  | 0.56107700  |
| C  | 5.73632300 | 0.66320200  | 1.47615800  |
| C  | 3.15119000 | 0.44932900  | 2.30978100  |
| C  | 5.46680700 | 0.69704200  | 2.84226300  |
| H  | 6.75390300 | 0.74987100  | 1.10909700  |
| C  | 4.14278300 | 0.59901500  | 3.27162200  |
| H  | 2.10317800 | 0.37970400  | 2.57972100  |
| H  | 6.27612300 | 0.80547500  | 3.55859600  |
| H  | 3.87900900 | 0.63641500  | 4.32325300  |
| C  | 2.18411000 | -3.02035800 | -0.49653500 |
| C  | 2.38192300 | -4.27185500 | 0.10846800  |

|    |             |             |             |
|----|-------------|-------------|-------------|
| C  | 2.05315300  | -4.45378700 | 1.44678000  |
| H  | 2.78087700  | -5.08963600 | -0.48414400 |
| C  | 1.34584700  | -2.17529900 | 1.49440300  |
| C  | 1.50878500  | -3.38031100 | 2.15961900  |
| H  | 2.20154300  | -5.41882800 | 1.92268200  |
| H  | 0.89750900  | -1.29936300 | 1.94280600  |
| H  | 1.21094000  | -3.47534600 | 3.19845400  |
| N  | 1.69257600  | -1.98792900 | 0.20633400  |
| N  | 1.79202900  | 2.25396700  | -0.75705300 |
| N  | 3.41253500  | 0.40060600  | 0.98982700  |
| C  | 2.21012500  | -1.52559200 | -2.64653300 |
| H  | 2.53302200  | -1.64141600 | -3.69047000 |
| H  | 1.13300500  | -1.33396700 | -2.65567700 |
| H  | 3.52595700  | -3.17904100 | -2.14243900 |
| H  | 1.87677500  | -3.59805900 | -2.50366900 |
| C  | 4.94609400  | 0.57587100  | -0.92397300 |
| H  | 4.62719400  | 1.55967600  | -1.28860100 |
| H  | 6.02644300  | 0.52490700  | -1.08788700 |
| H  | 2.89197000  | 0.34681700  | -4.08994200 |
| C  | 1.43064900  | 1.57102200  | -3.05601500 |
| H  | 0.58812400  | 0.89862900  | -2.85469700 |
| H  | 1.26391700  | 2.02309500  | -4.03855600 |
| O  | -0.31199400 | 0.45833400  | -0.96747100 |
| Ni | -1.81497800 | 0.02020000  | 0.22858000  |
| N  | -2.88152900 | -0.42752300 | 2.03588400  |
| C  | -2.97487900 | 0.73990900  | 2.97500200  |
| H  | -3.87561700 | 1.30483100  | 2.73518100  |
| C  | -4.24826900 | -0.93509200 | 1.72690100  |
| H  | -4.80219000 | -1.07104500 | 2.66697000  |
| H  | -4.13979400 | -1.91638800 | 1.26301700  |
| C  | -2.05844500 | -2.91620500 | 2.15681400  |
| C  | -1.90742100 | 2.75460300  | 1.89235500  |
| C  | -1.78878100 | 4.12185400  | 2.15919600  |
| C  | -1.93665500 | 5.04002800  | 1.12144400  |
| H  | -1.58773700 | 4.45333200  | 3.17307600  |
| C  | -2.30774800 | 3.19460800  | -0.35236400 |
| C  | -2.20770400 | 4.56868600  | -0.16344100 |
| H  | -1.84267200 | 6.10514900  | 1.31233000  |
| H  | -2.49856900 | 2.77468400  | -1.33314600 |
| H  | -2.32707100 | 5.24426200  | -1.00378900 |
| C  | -4.75531500 | -0.20118300 | -0.68794900 |
| C  | -5.78142300 | -0.34752300 | -1.62887400 |
| C  | -3.17282300 | -0.18186700 | -2.39175900 |
| C  | -5.47570100 | -0.40731100 | -2.98597600 |
| H  | -6.80997000 | -0.40872600 | -1.28830300 |
| C  | -4.14050000 | -0.31242000 | -3.37977700 |
| H  | -2.12066800 | -0.08936400 | -2.63759400 |

|   |             |             |             |
|---|-------------|-------------|-------------|
| H | -6.26582800 | -0.52133800 | -3.72251300 |
| H | -3.84948500 | -0.33821300 | -4.42457200 |
| C | -1.61145000 | -3.19671800 | 0.74110100  |
| C | -1.36566200 | -4.53920800 | 0.40378200  |
| C | -0.92401800 | -4.86809200 | -0.86989900 |
| H | -1.51243800 | -5.30809400 | 1.15656700  |
| C | -0.97504000 | -2.53580200 | -1.38128800 |
| C | -0.71660700 | -3.83589700 | -1.78822100 |
| H | -0.72926700 | -5.90264300 | -1.13742900 |
| H | -0.78956400 | -1.69547800 | -2.03877100 |
| H | -0.35400000 | -4.02851900 | -2.79266800 |
| N | -1.43437000 | -2.21267800 | -0.15205100 |
| N | -2.16429300 | 2.30897300  | 0.64627900  |
| N | -3.46466800 | -0.13903500 | -1.07627700 |
| C | -2.10881400 | -1.50105300 | 2.74601900  |
| H | -2.51552300 | -1.61566200 | 3.76104200  |
| H | -1.08609800 | -1.13454600 | 2.82024600  |
| H | -3.03045100 | -3.40348900 | 2.29881000  |
| H | -1.36022700 | -3.46002400 | 2.80599200  |
| C | -5.07455500 | -0.05722900 | 0.77749900  |
| H | -4.98469700 | 1.00348000  | 1.04109600  |
| H | -6.12616000 | -0.31943500 | 0.92672400  |
| H | -3.11491500 | 0.33792400  | 3.98637500  |
| C | -1.78860000 | 1.71441500  | 2.97412400  |
| H | -0.83972400 | 1.17908200  | 2.85479500  |
| H | -1.76439400 | 2.21671600  | 3.94619000  |
| O | 0.16663100  | 0.48293700  | 0.86138500  |

'21

E (SMD/B3LYP-D3/BS1) = -1512.2138703 au

G (SMD/B3LYP-D3/BS1) = -1511.749403 au

E (SMD/B3LYP-D3/BS2//SMD/B3LYP-D3/BS1) = -2850.15670734 au

charge = 0 spin multiplicity = 3

|    |             |             |             |
|----|-------------|-------------|-------------|
| Ni | -0.05329800 | -0.17920500 | 0.39461900  |
| N  | -0.01721600 | -2.18163100 | 1.25120000  |
| C  | -1.34336600 | -2.51667000 | 1.86862700  |
| H  | -1.93687800 | -3.06943700 | 1.13857800  |
| C  | 0.32877200  | -3.21484500 | 0.23848600  |
| H  | 0.18289300  | -4.21441800 | 0.67275100  |
| H  | 1.38570500  | -3.11449200 | -0.00744900 |
| C  | 2.46757700  | -2.09527900 | 1.98897300  |
| C  | -2.90813200 | -0.68362000 | 1.17733000  |
| C  | -4.29553800 | -0.51894200 | 1.17638200  |
| C  | -4.92460000 | -0.02207000 | 0.03512000  |
| H  | -4.86764300 | -0.78784400 | 2.05878900  |
| C  | -2.77410700 | 0.10222200  | -1.00599700 |
| C  | -4.15104100 | 0.28426900  | -1.08570200 |

|   |             |             |             |
|---|-------------|-------------|-------------|
| H | -6.00206100 | 0.11469700  | 0.01808800  |
| H | -2.12158800 | 0.33534700  | -1.84012300 |
| H | -4.59776000 | 0.66202000  | -1.99942900 |
| C | 0.06808900  | -2.07343800 | -2.03746100 |
| C | 0.29702000  | -2.40747000 | -3.37721000 |
| C | 0.74667300  | 0.11436500  | -2.44731400 |
| C | 0.76109900  | -1.43916700 | -4.26425600 |
| H | 0.10622600  | -3.42210300 | -3.71184800 |
| C | 0.98679100  | -0.14629000 | -3.79124100 |
| H | 0.87739500  | 1.10824000  | -2.03390600 |
| H | 0.94006100  | -1.68912200 | -5.30609100 |
| H | 1.33838100  | 0.64713300  | -4.44234300 |
| C | 2.99058200  | -0.87975300 | 1.26145200  |
| C | 4.37902600  | -0.69482800 | 1.16730300  |
| C | 4.88307500  | 0.44052200  | 0.54465500  |
| H | 5.04377000  | -1.44028900 | 1.59403500  |
| C | 2.62373400  | 1.13787000  | 0.17839600  |
| C | 3.98290200  | 1.38756200  | 0.04793300  |
| H | 5.95547100  | 0.59460300  | 0.46268500  |
| H | 1.86806000  | 1.84335400  | -0.14749300 |
| H | 4.32331600  | 2.30274600  | -0.42580100 |
| N | 2.13132700  | 0.01641500  | 0.74827500  |
| N | -2.16647900 | -0.35749700 | 0.09900100  |
| N | 0.30470800  | -0.82253100 | -1.58571400 |
| C | 0.98675600  | -2.14460300 | 2.36165700  |
| H | 0.85483000  | -3.04369500 | 2.98050000  |
| H | 0.73374800  | -1.27822000 | 2.98100900  |
| H | 2.76309700  | -2.99740500 | 1.44110900  |
| H | 3.00937200  | -2.16083700 | 2.94137600  |
| C | -0.47269400 | -3.09498900 | -1.06778800 |
| H | -1.52048100 | -2.85307900 | -0.85586700 |
| H | -0.47191900 | -4.07314400 | -1.55744100 |
| H | -1.17444700 | -3.19328300 | 2.71508400  |
| C | -2.15838800 | -1.29621000 | 2.33206900  |
| H | -1.49507600 | -0.55186600 | 2.79196700  |
| H | -2.86813000 | -1.61631800 | 3.10065900  |
| O | -0.14154400 | 1.60434000  | 0.92676000  |
| C | -0.79379700 | 3.05911700  | -0.91716000 |
| C | -1.05758200 | 2.66079800  | 0.51001100  |
| C | -0.89070600 | 3.86576100  | 1.39311100  |
| C | -0.04726800 | 4.90297500  | 1.04554500  |
| C | 0.51341300  | 5.02581600  | -0.25299600 |
| C | 0.05104500  | 4.11015300  | -1.23012200 |
| H | -2.07620200 | 2.24238400  | 0.61580800  |
| H | -1.33437200 | 3.83215700  | 2.39047700  |
| H | 0.15459500  | 5.68714700  | 1.78140600  |
| H | 1.12657700  | 5.88245700  | -0.52508700 |

|   |             |            |             |
|---|-------------|------------|-------------|
| H | 0.32848400  | 4.26882100 | -2.27676800 |
| H | -1.16311400 | 2.40465000 | -1.70622300 |

'22

E (SMD/B3LYP-D3/BS1) = -1279.65924913 au

G (SMD/B3LYP-D3/BS1) = -1279.281214 au

E (SMD/B3LYP-D3/BS2//SMD/B3LYP-D3/BS1) = -2617.50026489 au

charge = 2 spin multiplicity = 3

|    |             |             |             |
|----|-------------|-------------|-------------|
| Ni | -0.06434900 | -0.33253700 | -0.45527100 |
| N  | 0.11788100  | -1.29543800 | 1.44852500  |
| C  | 1.36629500  | -2.13630900 | 1.54745200  |
| H  | 2.10727600  | -1.58410600 | 2.12572100  |
| C  | 0.12458100  | -0.31023100 | 2.56840300  |
| H  | 0.37681300  | -0.84580800 | 3.49147600  |
| H  | -0.87671500 | 0.10071800  | 2.68472500  |
| C  | -2.44003400 | -1.53735900 | 1.51213500  |
| C  | 2.62422100  | -1.37690900 | -0.49556600 |
| C  | 3.98167200  | -1.35922300 | -0.82197100 |
| C  | 4.53040300  | -0.26042400 | -1.47749200 |
| H  | 4.59195700  | -2.21634300 | -0.55902400 |
| C  | 2.36675500  | 0.75659300  | -1.45028600 |
| C  | 3.70563600  | 0.81617300  | -1.80429300 |
| H  | 5.58518900  | -0.24627700 | -1.73365600 |
| H  | 1.68634300  | 1.56463700  | -1.68334600 |
| H  | 4.08176200  | 1.69122700  | -2.32220500 |
| C  | 0.53979100  | 1.90201500  | 1.43156900  |
| C  | 0.60468300  | 3.25310700  | 1.78371200  |
| C  | -0.53043500 | 2.47371000  | -0.56600200 |
| C  | 0.09102100  | 4.22588500  | 0.93335200  |
| H  | 1.06279200  | 3.52308000  | 2.72914200  |
| C  | -0.48879700 | 3.82670500  | -0.27078900 |
| H  | -0.95795100 | 2.12713300  | -1.49715200 |
| H  | 0.14154000  | 5.27578900  | 1.20471500  |
| H  | -0.90243500 | 4.54019200  | -0.97450900 |
| C  | -2.89441500 | -0.88540400 | 0.23477800  |
| C  | -4.26470100 | -0.82321200 | -0.04997800 |
| C  | -4.71611700 | -0.25564400 | -1.23402000 |
| H  | -4.96142600 | -1.23905500 | 0.67022000  |
| C  | -2.43904800 | 0.14281700  | -1.82525600 |
| C  | -3.78000800 | 0.22652200  | -2.15133700 |
| H  | -5.77880900 | -0.21048000 | -1.45080200 |
| H  | -1.67197900 | 0.46852100  | -2.51777600 |
| H  | -4.07295200 | 0.64790600  | -3.10617200 |
| N  | -2.01169100 | -0.36426000 | -0.64285200 |
| N  | 1.85060900  | -0.30637300 | -0.79799600 |
| N  | -0.03407600 | 1.52816500  | 0.26389200  |
| C  | -1.06761900 | -2.20496400 | 1.52729700  |

|   |             |             |             |
|---|-------------|-------------|-------------|
| H | -0.99281300 | -2.76988800 | 2.46473100  |
| H | -0.97990700 | -2.90929800 | 0.69672200  |
| H | -2.54424800 | -0.81571900 | 2.32969800  |
| H | -3.16027800 | -2.32933400 | 1.74059800  |
| C | 1.10047400  | 0.84471900  | 2.33880100  |
| H | 2.05257700  | 0.48673800  | 1.92897200  |
| H | 1.33001600  | 1.30038400  | 3.30499300  |
| H | 1.11659100  | -3.03557900 | 2.11820000  |
| C | 1.99367500  | -2.54274300 | 0.21524300  |
| H | 1.24875700  | -3.02014800 | -0.42739000 |
| H | 2.76875900  | -3.28358600 | 0.42770800  |
| O | -0.16954300 | -1.68740700 | -1.55918800 |

'23

E (SMD/B3LYP-D3/BS1) = -1511.9894053 au

G (SMD/B3LYP-D3/BS1) = -1511.517938 au

E (SMD/B3LYP-D3/BS2//SMD/B3LYP-D3/BS1) = -2849.91085169 au

charge = 2 spin multiplicity = 3

|    |             |             |             |
|----|-------------|-------------|-------------|
| Ni | 0.37358000  | 0.01896800  | -0.09631000 |
| N  | 0.38537100  | -0.00409000 | 1.97730800  |
| C  | 0.12262400  | -1.37466300 | 2.53048600  |
| H  | 1.06066300  | -1.92802300 | 2.53602900  |
| C  | 1.70480000  | 0.49330200  | 2.47608200  |
| H  | 1.69692400  | 0.44493000  | 3.57305000  |
| H  | 1.79676500  | 1.54002200  | 2.18610100  |
| C  | -0.59084600 | 2.38837400  | 2.11554100  |
| C  | -0.38848900 | -2.81959000 | 0.49514600  |
| C  | -0.60572700 | -4.16722800 | 0.19588800  |
| C  | -0.11087800 | -4.70292000 | -0.99121200 |
| H  | -1.16014000 | -4.78325200 | 0.89606900  |
| C  | 0.79518900  | -2.55125100 | -1.49959200 |
| C  | 0.60873300  | -3.87993300 | -1.85836100 |
| H  | -0.27943300 | -5.74812300 | -1.23280000 |
| H  | 1.34636600  | -1.86762100 | -2.13560200 |
| H  | 1.01778100  | -4.25197100 | -2.79130300 |
| C  | 3.36619500  | 0.07932500  | 0.54335900  |
| C  | 4.72362900  | 0.23599800  | 0.24073600  |
| C  | 2.81990000  | 0.41241700  | -1.69726900 |
| C  | 5.12228200  | 0.48140700  | -1.06974100 |
| H  | 5.45459200  | 0.16023300  | 1.03909800  |
| C  | 4.14866800  | 0.56586600  | -2.06591900 |
| H  | 2.02745300  | 0.46522800  | -2.43539000 |
| H  | 6.17426700  | 0.60303600  | -1.31014100 |
| H  | 4.40519800  | 0.74781900  | -3.10381600 |
| C  | -0.57135900 | 2.84181600  | 0.67478600  |
| C  | -1.05190500 | 4.12197100  | 0.36648300  |
| C  | -0.99340200 | 4.59731600  | -0.93821800 |



|   |             |             |             |
|---|-------------|-------------|-------------|
| H | -1.46791100 | 4.73278100  | 1.16117600  |
| C | -0.00632700 | 2.51646300  | -1.56225400 |
| C | -0.45466700 | 3.77535900  | -1.93015500 |
| H | -1.36587000 | 5.58839000  | -1.17945600 |
| H | 0.39358500  | 1.83125600  | -2.30126800 |
| H | -0.39076800 | 4.09244000  | -2.96523400 |
| N | -0.05556400 | 2.05363400  | -0.29275400 |
| N | 0.30584500  | -2.03145500 | -0.35729800 |
| N | 2.43078000  | 0.18169100  | -0.42573100 |
| C | -0.72246100 | 0.89827700  | 2.43601000  |
| H | -0.79903400 | 0.81162700  | 3.52785500  |
| H | -1.64683900 | 0.51431800  | 2.00244400  |
| H | 0.28974200  | 2.81180100  | 2.61325400  |
| H | -1.44821800 | 2.86794700  | 2.59977900  |
| C | 2.93501300  | -0.25566600 | 1.94927700  |
| H | 2.79668500  | -1.34136700 | 2.01237200  |
| H | 3.76339300  | -0.02266500 | 2.62449900  |
| H | -0.19590600 | -1.26157900 | 3.57358400  |
| C | -0.91879100 | -2.19935000 | 1.76448300  |
| H | -1.80311600 | -1.59631900 | 1.53434400  |
| H | -1.25653700 | -3.00160400 | 2.42667000  |
| O | -1.82182600 | -0.11927700 | -0.34738600 |
| C | -2.69088300 | 0.48854600  | -1.35457100 |
| C | -2.60299000 | -1.00824700 | -1.20902300 |
| C | -3.72023400 | -1.69997800 | -0.54983300 |
| C | -4.70374100 | -0.98194600 | 0.04164900  |
| C | -4.78521700 | 0.46478400  | -0.09514800 |
| C | -3.88336900 | 1.16350800  | -0.82382400 |
| H | -1.97519400 | -1.56712900 | -1.89726900 |
| H | -3.73961400 | -2.78520500 | -0.57598700 |
| H | -5.51440200 | -1.49129400 | 0.55568700  |
| H | -5.65214900 | 0.96784200  | 0.32473600  |
| H | -4.02249000 | 2.21582800  | -1.05267700 |
| H | -2.13095500 | 0.97158100  | -2.14954500 |

**24**

E (SMD/B3LYP-D3/BS1) = -1279.94652701 au

G (SMD/B3LYP-D3/BS1) = -1279.574191 au

E (SMD/B3LYP-D3/BS2//SMD/B3LYP-D3/BS1) = -2617.80264774 au

charge = 0 spin multiplicity = 1

|    |             |             |             |
|----|-------------|-------------|-------------|
| Ni | 0.16369500  | -0.37416700 | -0.76485900 |
| N  | 0.13951500  | -1.62770200 | 0.94051000  |
| C  | 1.49208300  | -2.14065800 | 1.31152400  |
| H  | 1.97110100  | -1.41597200 | 1.97004600  |
| C  | -0.50043800 | -1.04911600 | 2.16257500  |
| H  | -0.48541000 | -1.80860100 | 2.95826900  |
| H  | -1.54133400 | -0.83111200 | 1.93049500  |

|   |             |             |             |
|---|-------------|-------------|-------------|
| C | -2.15742800 | -2.61443500 | 0.36118200  |
| C | 2.97846400  | -1.06743900 | -0.36899400 |
| C | 4.35688700  | -0.83538700 | -0.43014900 |
| C | 4.82864000  | 0.41750500  | -0.81201400 |
| H | 5.04019800  | -1.63862100 | -0.17386500 |
| C | 2.54652900  | 1.11096700  | -1.06832600 |
| C | 3.90168200  | 1.41265100  | -1.12816700 |
| H | 5.89617500  | 0.61486100  | -0.85649700 |
| H | 1.76563400  | 1.80170700  | -1.35407400 |
| H | 4.21678300  | 2.40890400  | -1.42200200 |
| C | -0.20297700 | 1.48314000  | 1.86922600  |
| C | 0.80630100  | 2.34109000  | 1.41412300  |
| C | -1.82940500 | 2.81644800  | 0.92764300  |
| C | 0.45861200  | 3.47036500  | 0.67524500  |
| H | 1.84628200  | 2.10851300  | 1.61910700  |
| C | -0.89042100 | 3.71468700  | 0.41659400  |
| H | -2.89180600 | 2.97634400  | 0.75376400  |
| H | 1.22766900  | 4.14067300  | 0.30090800  |
| H | -1.21166900 | 4.57770200  | -0.15843000 |
| C | -2.68692200 | -1.39056700 | -0.34585200 |
| C | -4.08063800 | -1.24627800 | -0.43443900 |
| C | -4.62903100 | -0.13561100 | -1.06001100 |
| H | -4.71373400 | -2.01771800 | -0.00599900 |
| C | -2.39207900 | 0.60594000  | -1.49603000 |
| C | -3.75857200 | 0.81130700  | -1.60637900 |
| H | -5.70672100 | -0.01176000 | -1.12421000 |
| H | -1.61769900 | 1.23445600  | -1.93648700 |
| H | -4.12918500 | 1.69924600  | -2.10943000 |
| N | -1.85225800 | -0.46841200 | -0.86666600 |
| N | 2.08913800  | -0.10418900 | -0.69195600 |
| N | -1.50620000 | 1.72964400  | 1.64032800  |
| C | -0.64897900 | -2.80465400 | 0.44854100  |
| H | -0.47416200 | -3.66048800 | 1.11597900  |
| H | -0.25136100 | -3.06937000 | -0.53424900 |
| H | -2.59948900 | -2.64336400 | 1.36375800  |
| H | -2.55276300 | -3.50131300 | -0.15109700 |
| C | 0.12080800  | 0.25264400  | 2.68943200  |
| H | 1.20351800  | 0.16949100  | 2.81494000  |
| H | -0.29547900 | 0.39593500  | 3.69588800  |
| H | 1.37293200  | -3.07012200 | 1.88427800  |
| C | 2.41582600  | -2.37359900 | 0.11092400  |
| H | 1.87817800  | -2.87459300 | -0.70254400 |
| H | 3.23135400  | -3.03493200 | 0.41808700  |
| O | 0.17156500  | 0.56843200  | -2.23199700 |

'25

E (SMD/B3LYP-D3/BS1) = -1587.36150211 au

G (SMD/B3LYP-D3/BS1) = -1586.894797 au

E (SMD/B3LYP-D3/BS2//SMD/B3LYP-D3/BS1) = -2925.33656765 au

O 3

|    |             |             |             |
|----|-------------|-------------|-------------|
| O  | 1.34966700  | 1.94262000  | -1.17348900 |
| Ni | -0.27891200 | -0.12053700 | -0.27147100 |
| N  | -1.67923300 | -1.21934200 | -1.45889600 |
| C  | -1.03255800 | -2.37254400 | -2.16583200 |
| H  | -1.11946800 | -3.25881000 | -1.53673000 |
| C  | -2.81306000 | -1.71277400 | -0.63179700 |
| H  | -3.47784400 | -2.32318600 | -1.26056300 |
| H  | -3.38349800 | -0.84892600 | -0.28955400 |
| C  | -3.03033900 | 0.90799100  | -2.07090200 |
| C  | 1.36004800  | -2.44094200 | -1.34724300 |
| C  | 2.41170000  | -3.35905500 | -1.41827400 |
| C  | 3.20567300  | -3.58632000 | -0.29409600 |
| H  | 2.59694700  | -3.88840700 | -2.34770600 |
| C  | 1.86158100  | -1.99426600 | 0.87818200  |
| C  | 2.92369100  | -2.89314500 | 0.88306700  |
| H  | 4.02812100  | -4.29480600 | -0.33694400 |
| H  | 1.60464600  | -1.42098400 | 1.76249600  |
| H  | 3.51160000  | -3.03563500 | 1.78381500  |
| C  | -1.97293600 | -1.72451100 | 1.81005500  |
| C  | -2.49576500 | -2.01744200 | 3.07583200  |
| C  | -0.59784400 | -0.09770900 | 2.73657500  |
| C  | -2.04180400 | -1.32169500 | 4.19330800  |
| H  | -3.24869900 | -2.79319300 | 3.17305400  |
| C  | -1.06122100 | -0.34396200 | 4.02327400  |
| H  | 0.17340900  | 0.64289000  | 2.55339500  |
| H  | -2.44117100 | -1.54333100 | 5.17882400  |
| H  | -0.66139000 | 0.21728000  | 4.86117200  |
| C  | -2.47201600 | 1.96587300  | -1.14766700 |
| C  | -2.97529500 | 3.27176200  | -1.24222600 |
| C  | -2.53600600 | 4.25417900  | -0.36047700 |
| H  | -3.71227000 | 3.50182100  | -2.00555500 |
| C  | -1.12245100 | 2.60190700  | 0.62464500  |
| C  | -1.58794700 | 3.91061800  | 0.60322100  |
| H  | -2.92276700 | 5.26719900  | -0.42662100 |
| H  | -0.36994100 | 2.29841100  | 1.33943600  |
| H  | -1.20359100 | 4.63547700  | 1.31326600  |
| N  | -1.55169600 | 1.64358300  | -0.21800200 |
| N  | 1.10069900  | -1.77086800 | -0.20463300 |
| N  | -1.04521100 | -0.75705700 | 1.65046100  |
| C  | -2.14225600 | -0.25872100 | -2.50951700 |
| H  | -2.71710900 | -0.82000100 | -3.26088100 |
| H  | -1.24047700 | 0.13462800  | -2.98279400 |
| H  | -3.96519500 | 0.53415300  | -1.63393000 |
| H  | -3.33452800 | 1.40590000  | -2.99860900 |

|   |             |             |             |
|---|-------------|-------------|-------------|
| C | -2.39705100 | -2.52737300 | 0.60415000  |
| H | -1.58209000 | -3.21841200 | 0.35795000  |
| H | -3.24881000 | -3.15169200 | 0.88953200  |
| H | -1.60207800 | -2.57837400 | -3.08127300 |
| C | 0.45035700  | -2.16764700 | -2.51708800 |
| H | 0.62467500  | -1.14111500 | -2.85815200 |
| H | 0.70593700  | -2.84491400 | -3.33779700 |
| O | 0.74223700  | 0.72143800  | -1.72298800 |
| C | 2.43659000  | 2.82757800  | 0.78804300  |
| C | 2.14440500  | 1.57940400  | 0.04215400  |
| C | 3.38194600  | 0.81742000  | -0.26805400 |
| C | 4.64585000  | 1.33134000  | -0.05528500 |
| C | 4.86825500  | 2.58317400  | 0.56513800  |
| C | 3.72611700  | 3.29531300  | 0.98289300  |
| H | 1.58985500  | 3.41821900  | 1.13230900  |
| H | 1.38091600  | 0.92867700  | 0.58218000  |
| H | 3.25802100  | -0.14723000 | -0.75231400 |
| H | 5.50645000  | 0.73463700  | -0.36736900 |
| H | 5.87198200  | 2.95963700  | 0.74492200  |
| H | 3.85475000  | 4.24775300  | 1.50243500  |

'26

E (SMD/B3LYP-D3/BS1) = -1587.10143657 au

G (SMD/B3LYP-D3/BS1) = -1586.627833 au

E (SMD/B3LYP-D3/BS2//SMD/B3LYP-D3/BS1) = -2925.05644442 au

charge = 2 spin multiplicity = 3

|    |             |             |             |
|----|-------------|-------------|-------------|
| O  | 1.52728200  | 1.86538100  | -1.19689300 |
| Ni | -0.35635100 | -0.12817300 | -0.22545400 |
| N  | -1.78320800 | -0.97193600 | -1.52056400 |
| C  | -1.25212400 | -2.18492900 | -2.22691600 |
| H  | -1.43991400 | -3.05741600 | -1.60169000 |
| C  | -3.02343300 | -1.33245400 | -0.77241500 |
| H  | -3.72302600 | -1.81561600 | -1.46833800 |
| H  | -3.48571700 | -0.40969500 | -0.42183000 |
| C  | -2.79848500 | 1.33877000  | -2.10672500 |
| C  | 1.12402700  | -2.49672800 | -1.38293800 |
| C  | 2.15083700  | -3.43967700 | -1.48488100 |
| C  | 2.93055800  | -3.73570600 | -0.36757800 |
| H  | 2.32934800  | -3.93247700 | -2.43521300 |
| C  | 1.61435400  | -2.17214300 | 0.87109900  |
| C  | 2.65453200  | -3.09443500 | 0.84057100  |
| H  | 3.73546200  | -4.46160500 | -0.43780400 |
| H  | 1.35891800  | -1.63974100 | 1.78134700  |
| H  | 3.22757800  | -3.29821300 | 1.73882000  |
| C  | -2.31598500 | -1.56998100 | 1.70007700  |
| C  | -2.89911900 | -1.86171300 | 2.93901900  |
| C  | -0.77136300 | -0.17531600 | 2.74237000  |

|   |             |             |             |
|---|-------------|-------------|-------------|
| C | -2.38814900 | -1.28955600 | 4.10074900  |
| H | -3.74531400 | -2.53989100 | 2.97983300  |
| C | -1.29151800 | -0.43183500 | 4.00396900  |
| H | 0.08549500  | 0.47780700  | 2.61506800  |
| H | -2.83511900 | -1.51244800 | 5.06514300  |
| H | -0.84761000 | 0.03063100  | 4.87892600  |
| C | -2.14539500 | 2.27125400  | -1.11263500 |
| C | -2.49542100 | 3.62952400  | -1.13760500 |
| C | -1.95409600 | 4.50853300  | -0.20689000 |
| H | -3.19284100 | 3.98083700  | -1.89159200 |
| C | -0.74672000 | 2.66153100  | 0.69997500  |
| C | -1.05449500 | 4.01335600  | 0.73907100  |
| H | -2.22270100 | 5.56073900  | -0.22222300 |
| H | -0.03518200 | 2.23821800  | 1.39952400  |
| H | -0.59435700 | 4.65459100  | 1.48334100  |
| N | -1.28060000 | 1.80236400  | -0.19156800 |
| N | 0.87637800  | -1.87254100 | -0.21111500 |
| N | -1.27178800 | -0.71862600 | 1.61498500  |
| C | -2.06331100 | 0.07435300  | -2.55703500 |
| H | -2.67748900 | -0.38142800 | -3.34581500 |
| H | -1.09881700 | 0.35004800  | -2.98710600 |
| H | -3.79824900 | 1.08843200  | -1.73123200 |
| H | -2.97968600 | 1.91086500  | -3.02360900 |
| C | -2.81089200 | -2.24545700 | 0.44421000  |
| H | -2.12223700 | -3.06463700 | 0.20622400  |
| H | -3.77223500 | -2.71780400 | 0.66647000  |
| H | -1.82823600 | -2.32081300 | -3.15034100 |
| C | 0.24697400  | -2.14143400 | -2.55818700 |
| H | 0.53168000  | -1.15086400 | -2.92881100 |
| H | 0.43571800  | -2.85380700 | -3.36675100 |
| O | 0.96390700  | 0.58315500  | -1.60289400 |
| C | 2.95661900  | 2.83194700  | 0.46784000  |
| C | 2.47857600  | 1.62320600  | -0.21492800 |
| C | 3.42731300  | 0.51058700  | -0.38148600 |
| C | 4.61096800  | 0.51744900  | 0.32048900  |
| C | 4.97530300  | 1.65984000  | 1.05675300  |
| C | 4.15755400  | 2.80744300  | 1.13312600  |
| H | 2.29075900  | 3.68893600  | 0.49701900  |
| H | 1.96267200  | 1.16997700  | 0.70462900  |
| H | 3.10218700  | -0.32742400 | -0.98541900 |
| H | 5.28268100  | -0.33314600 | 0.27400000  |
| H | 5.92598700  | 1.66250000  | 1.58243900  |
| H | 4.49046500  | 3.67059400  | 1.69924300  |

\$27

E (SMD/B3LYP-D3/BS1) = -1204.71657817 au

G (SMD/B3LYP-D3/BS1) = -1204.346742 au

E (SMD/B3LYP-D3/BS2//SMD/B3LYP-D3/BS1) = -2542.54299504 au

charge = 0 spin multiplicity = 1

|    |             |             |             |
|----|-------------|-------------|-------------|
| Ni | -0.00108200 | -0.00749800 | -0.41834800 |
| N  | 0.00968500  | -0.01300200 | 2.00526200  |
| C  | 0.20881700  | 1.37564500  | 2.44709300  |
| H  | -0.76341400 | 1.87670400  | 2.46798300  |
| C  | -1.29149800 | -0.53783500 | 2.44609700  |
| H  | -1.49776900 | -0.22698000 | 3.48444100  |
| H  | -1.24153000 | -1.63066700 | 2.45180800  |
| C  | 1.33262900  | -2.09876800 | 1.51263900  |
| C  | 0.47388300  | 2.77847600  | 0.32511800  |
| C  | 0.35510400  | 4.16387100  | 0.18998800  |
| C  | -0.27863300 | 4.72140700  | -0.92117000 |
| H  | 0.77277800  | 4.80207500  | 0.96395000  |
| C  | -0.65174000 | 2.47897200  | -1.69342500 |
| C  | -0.78974700 | 3.84453800  | -1.88561900 |
| H  | -0.36614300 | 5.79794000  | -1.03383400 |
| H  | -1.04571100 | 1.77126000  | -2.41637900 |
| H  | -1.29184200 | 4.21034300  | -2.77663600 |
| C  | -2.65415700 | -0.97913100 | 0.32672700  |
| C  | -3.80270100 | -1.76164900 | 0.18567100  |
| C  | -1.84555000 | -1.78941200 | -1.70346400 |
| C  | -3.97997000 | -2.57505400 | -0.93431500 |
| H  | -4.56163300 | -1.72013000 | 0.96224000  |
| C  | -2.96748700 | -2.57853400 | -1.90140500 |
| H  | -1.03730200 | -1.77686800 | -2.42818900 |
| H  | -4.87477800 | -3.17913500 | -1.05116900 |
| H  | -3.04129200 | -3.18579000 | -2.79897300 |
| C  | 2.18639000  | -1.80161100 | 0.30851400  |
| C  | 3.44937800  | -2.38140100 | 0.16665800  |
| C  | 4.24216300  | -2.10350100 | -0.94765000 |
| H  | 3.80200700  | -3.06049000 | 0.93816500  |
| C  | 2.47196500  | -0.67169600 | -1.71009500 |
| C  | 3.72693800  | -1.22497000 | -1.90860600 |
| H  | 5.22119300  | -2.55833600 | -1.06543900 |
| H  | 2.04735400  | 0.02104000  | -2.43017800 |
| H  | 4.28867600  | -0.96749300 | -2.80194000 |
| N  | 1.68513600  | -0.92934600 | -0.62396400 |
| N  | -0.03855700 | 1.91684400  | -0.61068100 |
| N  | -1.65443600 | -0.99090000 | -0.61222400 |
| C  | 1.11519200  | -0.88056900 | 2.43953300  |
| H  | 0.94458800  | -1.22989500 | 3.47204700  |
| H  | 2.03504600  | -0.28887400 | 2.45877200  |
| H  | 0.35339600  | -2.46858600 | 1.18036700  |
| H  | 1.80633600  | -2.89765200 | 2.09313900  |
| C  | -2.46282200 | -0.10234900 | 1.53588800  |
| H  | -2.29099500 | 0.93211500  | 1.20990700  |

|   |             |             |            |
|---|-------------|-------------|------------|
| H | -3.38468000 | -0.11088800 | 2.12712300 |
| H | 0.59572000  | 1.39710400  | 3.48004800 |
| C | 1.15658300  | 2.17715800  | 1.52504800 |
| H | 1.96490800  | 1.51496300  | 1.18753400 |
| H | 1.61416300  | 2.98147700  | 2.11085700 |

'g'

E (SMD/B3LYP-D3/BS1) = -1337.3344251 au

G (SMD/B3LYP-D3/BS1) = -1336.921738 au

E (SMD/B3LYP-D3/BS2//SMD/B3LYP-D3/BS1) = -2675.19221604 au

charge = 2 spin multiplicity = 3

|    |             |             |             |
|----|-------------|-------------|-------------|
| Ni | -0.03876000 | -0.18391700 | -0.13200100 |
| N  | 0.08012800  | -0.09286800 | 1.97238800  |
| C  | 1.31919200  | -0.76078200 | 2.50990700  |
| H  | 2.08769000  | -0.00052700 | 2.64966500  |
| C  | 0.06242200  | 1.32991700  | 2.43165600  |
| H  | 0.23364500  | 1.34445600  | 3.51563700  |
| H  | -0.93007400 | 1.73862600  | 2.24562100  |
| C  | -2.49599800 | -0.27595700 | 2.20329000  |
| C  | 2.65334800  | -1.34324300 | 0.43930000  |
| C  | 3.99348600  | -1.66381600 | 0.21075200  |
| C  | 4.65483200  | -1.12201900 | -0.89006200 |
| H  | 4.50556700  | -2.33045900 | 0.89683700  |
| C  | 2.63301700  | 0.02175000  | -1.45505400 |
| C  | 3.96266500  | -0.26065200 | -1.74245500 |
| H  | 5.69656500  | -1.36538500 | -1.07703600 |
| H  | 2.04609900  | 0.68657700  | -2.07947200 |
| H  | 4.43669000  | 0.18631900  | -2.60951900 |
| C  | 0.64874100  | 2.75017000  | 0.38701900  |
| C  | 0.78163100  | 4.10257800  | 0.05726500  |
| C  | -0.23649700 | 2.30793500  | -1.72357900 |
| C  | 0.39626800  | 4.55161100  | -1.20309600 |
| H  | 1.18750600  | 4.78933700  | 0.79273400  |
| C  | -0.12159400 | 3.63407400  | -2.11788700 |
| H  | -0.62808000 | 1.55552300  | -2.39777900 |
| H  | 0.49752300  | 5.60022100  | -1.46661200 |
| H  | -0.43193500 | 3.93180800  | -3.11351700 |
| C  | -3.00009300 | -0.28727300 | 0.78078300  |
| C  | -4.38130600 | -0.35482300 | 0.54877200  |
| C  | -4.87162200 | -0.35949900 | -0.75135100 |
| H  | -5.05622800 | -0.40866200 | 1.39701700  |
| C  | -2.61326300 | -0.25664400 | -1.51516900 |
| C  | -3.96489300 | -0.31645100 | -1.81328700 |
| H  | -5.94054200 | -0.41027800 | -0.93610800 |
| H  | -1.86799200 | -0.25120300 | -2.30404500 |
| H  | -4.29220300 | -0.33704600 | -2.84701500 |
| N  | -2.13560500 | -0.22183500 | -0.25102800 |

|   |             |             |             |
|---|-------------|-------------|-------------|
| N | 1.99557700  | -0.50580400 | -0.39396900 |
| N | 0.13474400  | 1.87286600  | -0.50258600 |
| C | -1.10660700 | -0.84590400 | 2.49826500  |
| H | -1.01256300 | -0.90556700 | 3.59025500  |
| H | -1.03155200 | -1.86199800 | 2.09972100  |
| H | -2.59411700 | 0.74089500  | 2.60034900  |
| H | -3.19059200 | -0.87720600 | 2.80022000  |
| C | 1.09122600  | 2.22947900  | 1.73032700  |
| H | 2.04638300  | 1.70624600  | 1.60166800  |
| H | 1.29370900  | 3.08176100  | 2.38463900  |
| H | 1.08335200  | -1.16315100 | 3.50103800  |
| C | 1.89317000  | -1.87629400 | 1.62746900  |
| H | 1.09210700  | -2.54484600 | 1.29440200  |
| H | 2.57126100  | -2.47386100 | 2.24315900  |
| C | -0.37990200 | -3.37827900 | -1.26224400 |
| C | -0.54187600 | -4.70339800 | -1.83523700 |
| H | 0.37733900  | -5.28004500 | -1.69092400 |
| H | -1.37497000 | -5.21607200 | -1.34396400 |
| H | -0.75125000 | -4.61529700 | -2.90626200 |
| N | -0.25000700 | -2.32455800 | -0.80151600 |

tg<sup>ii</sup>

E (SMD/B3LYP-D3/BS1) = -1337.33326828 au

G (SMD/B3LYP-D3/BS1) = -1336.921602 au

E (SMD/B3LYP-D3/BS2//SMD/B3LYP-D3/BS1) = -2675.19098858 au

charge = 2 spin multiplicity = 3

|    |             |             |             |
|----|-------------|-------------|-------------|
| Ni | 0.00187400  | 0.01618300  | -0.41383200 |
| N  | -0.07615500 | -2.09989900 | -0.35804900 |
| C  | 1.22285300  | -2.73925100 | -0.76862400 |
| H  | 1.83237300  | -2.89437900 | 0.12165400  |
| C  | -0.44017300 | -2.55335600 | 1.01620600  |
| H  | -0.36476800 | -3.64753700 | 1.05917800  |
| H  | -1.47936500 | -2.28173300 | 1.20085300  |
| C  | -2.55971700 | -2.22114500 | -1.06888600 |
| C  | 2.82702400  | -0.84883700 | -1.08595200 |
| C  | 4.21928100  | -0.76687000 | -1.16003000 |
| C  | 4.88886000  | 0.20454900  | -0.41869900 |
| H  | 4.76148300  | -1.46583400 | -1.78827400 |
| C  | 2.76748500  | 0.93653300  | 0.40935600  |
| C  | 4.14995400  | 1.07009500  | 0.39022000  |
| H  | 5.97111500  | 0.28111900  | -0.46626400 |
| H  | 2.14355100  | 1.59114700  | 1.00733600  |
| H  | 4.62855500  | 1.83600600  | 0.99085600  |
| C  | 0.00311600  | -0.54695300 | 2.55739200  |
| C  | -0.14528100 | -0.24421500 | 3.91486300  |
| C  | -0.52790100 | 1.65418500  | 1.99919500  |
| C  | -0.48928800 | 1.04571400  | 4.30872500  |



|   |             |             |             |
|---|-------------|-------------|-------------|
| H | 0.01425400  | -1.02585500 | 4.65007000  |
| C | -0.68154600 | 2.01992500  | 3.32910900  |
| H | -0.65802800 | 2.37883500  | 1.20526900  |
| H | -0.60371200 | 1.28647500  | 5.36143000  |
| H | -0.94423800 | 3.04149500  | 3.58124200  |
| C | -3.01310300 | -0.78648800 | -0.97989700 |
| C | -4.39190800 | -0.53697500 | -1.04975200 |
| C | -4.87407900 | 0.76196000  | -0.97742100 |
| H | -5.06948300 | -1.37723800 | -1.16474300 |
| C | -2.60674800 | 1.48792700  | -0.78472400 |
| C | -3.95377200 | 1.80389800  | -0.84821900 |
| H | -5.94043300 | 0.96069800  | -1.02914300 |
| H | -1.86874100 | 2.27152900  | -0.68942800 |
| H | -4.26611100 | 2.84137700  | -0.79771700 |
| N | -2.12663600 | 0.22194100  | -0.83551800 |
| N | 2.12159800  | 0.00358600  | -0.31379500 |
| N | -0.19816700 | 0.40362400  | 1.61590600  |
| C | -1.09847600 | -2.51801200 | -1.37365800 |
| H | -1.02110000 | -3.60411600 | -1.50965800 |
| H | -0.81382500 | -2.04464500 | -2.31820700 |
| H | -2.88358400 | -2.74642100 | -0.16291700 |
| H | -3.12786700 | -2.69140300 | -1.88045400 |
| C | 0.42401100  | -1.92868600 | 2.12267700  |
| H | 1.47698900  | -1.88730600 | 1.82028900  |
| H | 0.38109700  | -2.58957100 | 2.99258200  |
| H | 0.99926900  | -3.72973800 | -1.17874500 |
| C | 2.03546800  | -1.92111700 | -1.78419100 |
| H | 1.37123300  | -1.47463700 | -2.53601600 |
| H | 2.71503700  | -2.59294100 | -2.31527400 |
| C | 0.73026800  | 2.91620000  | -1.77717700 |
| C | 1.21857200  | 4.11136300  | -2.43988900 |
| H | 1.06729400  | 4.01700300  | -3.52008900 |
| H | 0.67061600  | 4.98428700  | -2.07052200 |
| H | 2.28614000  | 4.23331500  | -2.22954400 |
| N | 0.34227400  | 1.96707100  | -1.24143400 |

tg<sup>iii</sup>

E (SMD/B3LYP-D3/BS1) = -1470.11129450 au

G (SMD/B3LYP-D3/BS1) = -1469.659037 au

E (SMD/B3LYP-D3/BS2//SMD/B3LYP-D3/BS1) = -2808.02236531 au

charge = 2 spin multiplicity = 3

|    |             |             |             |
|----|-------------|-------------|-------------|
| Ni | -0.02303900 | 0.15835500  | -0.00882700 |
| N  | 0.00151100  | -0.07144100 | -2.17280300 |
| C  | 1.19679600  | 0.55182000  | -2.84620700 |
| H  | 1.96563300  | -0.21112200 | -2.96775700 |
| C  | -0.02991600 | -1.52300400 | -2.51900400 |
| H  | 0.04295200  | -1.62433500 | -3.61029100 |

|   |             |             |             |
|---|-------------|-------------|-------------|
| H | -0.99410300 | -1.92798700 | -2.21215700 |
| C | -2.58129900 | 0.04936100  | -2.36714300 |
| C | 2.66559400  | 1.30729200  | -0.95035800 |
| C | 4.02375200  | 1.63056700  | -0.86867900 |
| C | 4.79407200  | 1.12500800  | 0.17549000  |
| H | 4.46420600  | 2.26491500  | -1.63089100 |
| C | 2.83467400  | 0.01741600  | 0.98066900  |
| C | 4.19003200  | 0.28885900  | 1.11543300  |
| H | 5.84996300  | 1.36894400  | 0.24745600  |
| H | 2.31776200  | -0.62083400 | 1.68700300  |
| H | 4.74976400  | -0.14460100 | 1.93727600  |
| C | 0.73319700  | -2.83762300 | -0.46351000 |
| C | 0.89659900  | -4.18614400 | -0.12804700 |
| C | -0.00608400 | -2.37565700 | 1.68946200  |
| C | 0.59896300  | -4.62543100 | 1.15844000  |
| H | 1.25684500  | -4.87842100 | -0.88194400 |
| C | 0.13741200  | -3.69724900 | 2.09083600  |
| H | -0.35063700 | -1.62402700 | 2.38678400  |
| H | 0.72345500  | -5.67047500 | 1.42645900  |
| H | -0.10809700 | -3.98120200 | 3.10853600  |
| C | -3.06723200 | 0.00318100  | -0.93810800 |
| C | -4.45508800 | -0.02514900 | -0.73008300 |
| C | -4.97183000 | -0.13416300 | 0.55387700  |
| H | -5.11574200 | 0.03618400  | -1.58910900 |
| C | -2.72125000 | -0.16317900 | 1.34925400  |
| C | -4.07921800 | -0.20847700 | 1.62386100  |
| H | -6.04512300 | -0.15701500 | 0.71803600  |
| H | -2.00105900 | -0.19803900 | 2.15387200  |
| H | -4.41969000 | -0.29284900 | 2.65036000  |
| N | -2.20892700 | -0.06194700 | 0.10213800  |
| N | 2.08377100  | 0.52201100  | -0.01677900 |
| N | 0.27994800  | -1.94344400 | 0.44420600  |
| C | -1.21030000 | 0.62859000  | -2.70781300 |
| H | -1.14663800 | 0.62836300  | -3.80426700 |
| H | -1.14792600 | 1.66610900  | -2.37512000 |
| H | -2.68192000 | -0.95958800 | -2.78579300 |
| H | -3.29638500 | 0.65602000  | -2.93421100 |
| C | 1.07687700  | -2.34999700 | -1.84617000 |
| H | 2.01259300  | -1.78255400 | -1.78923700 |
| H | 1.28252500  | -3.21763700 | -2.47871000 |
| H | 0.89597800  | 0.85732200  | -3.85441600 |
| C | 1.82149300  | 1.74730100  | -2.11779000 |
| H | 1.04736400  | 2.44899100  | -1.79783200 |
| H | 2.45820900  | 2.27650000  | -2.83281700 |
| C | -0.90227600 | 3.40160800  | 0.12251500  |
| C | -1.39097500 | 4.75295700  | 0.33626500  |
| H | -0.84276100 | 5.44819400  | -0.30766700 |

|   |             |            |             |
|---|-------------|------------|-------------|
| H | -2.45786200 | 4.79929400 | 0.09535700  |
| H | -1.24315800 | 5.03489200 | 1.38374700  |
| N | -0.51053400 | 2.32734200 | -0.05372400 |
| C | 0.33677100  | 1.22894300 | 3.20791100  |
| C | 0.61079800  | 1.86487400 | 4.48468800  |
| H | 0.32778300  | 2.92121900 | 4.43551000  |
| H | 0.03529300  | 1.37073100 | 5.27410900  |
| H | 1.67922900  | 1.78492800 | 4.71023000  |
| N | 0.12241400  | 0.72232700 | 2.18980500  |

'28

E (SMD/B3LYP-D3/BS1) = -1279.9672598 au

G (SMD/B3LYP-D3/BS1) = -1279.600008 au

E (SMD/B3LYP-D3/BS2//SMD/B3LYP-D3/BS1) = -2617.81237385 au

charge = 0 spin multiplicity = 3

|    |             |             |             |
|----|-------------|-------------|-------------|
| Ni | -0.48944900 | -0.07853800 | -0.89315600 |
| N  | 0.25609300  | -0.68535400 | 1.00719200  |
| C  | 1.73002100  | -0.46143000 | 1.02588500  |
| H  | 1.89782700  | 0.60243900  | 0.85656600  |
| C  | -0.38106300 | 0.04522500  | 2.13262000  |
| H  | 0.01756700  | -0.33705400 | 3.08552200  |
| H  | -1.44996700 | -0.17241900 | 2.10797500  |
| C  | -1.46209300 | -2.56220300 | 1.37987300  |
| C  | 3.90308200  | -0.66567600 | -0.20077500 |
| C  | 5.04106200  | -1.41474000 | 0.12688300  |
| C  | 6.30434700  | -0.84441400 | -0.03089100 |
| H  | 4.93134300  | -2.42953300 | 0.49806700  |
| C  | 5.21147200  | 1.13694800  | -0.80780000 |
| C  | 6.39701100  | 0.46264300  | -0.50985000 |
| H  | 7.19865800  | -1.41011400 | 0.21681100  |
| H  | 5.24150100  | 2.15827800  | -1.18441900 |
| H  | 7.35682300  | 0.95034700  | -0.65026100 |
| C  | -1.05232200 | 2.31250400  | 1.09548900  |
| C  | -1.59716500 | 3.56046500  | 1.42740300  |
| C  | -1.93303800 | 2.48318900  | -1.04499200 |
| C  | -2.32644500 | 4.27672900  | 0.48353900  |
| H  | -1.44192100 | 3.95718300  | 2.42594500  |
| C  | -2.49675500 | 3.72613600  | -0.78757700 |
| H  | -2.02851500 | 2.02057900  | -2.02173800 |
| H  | -2.75225800 | 5.24423900  | 0.73371700  |
| H  | -3.05060500 | 4.24219400  | -1.56489100 |
| C  | -2.53931900 | -2.14047500 | 0.40287400  |
| C  | -3.76930400 | -2.81582200 | 0.44280900  |
| C  | -4.80467900 | -2.43127800 | -0.39982400 |
| H  | -3.89763900 | -3.63684700 | 1.14193600  |
| C  | -3.34334800 | -0.75629300 | -1.27552600 |
| C  | -4.58737100 | -1.37040500 | -1.28258100 |

|   |             |             |             |
|---|-------------|-------------|-------------|
| H | -5.75932800 | -2.94875000 | -0.37370000 |
| H | -3.12454300 | 0.05992100  | -1.95473500 |
| H | -5.35781800 | -1.02901500 | -1.96610900 |
| N | -2.33341900 | -1.11874000 | -0.45381800 |
| N | 3.99353200  | 0.59864300  | -0.66124000 |
| N | -1.23196900 | 1.77777800  | -0.13197300 |
| C | -0.01509700 | -2.14705300 | 1.11284400  |
| H | 0.59723800  | -2.56894600 | 1.92575200  |
| H | 0.31609300  | -2.60212100 | 0.17691000  |
| H | -1.77307200 | -2.24745300 | 2.38372700  |
| H | -1.45875600 | -3.65826600 | 1.41785700  |
| C | -0.21895800 | 1.56842800  | 2.11210100  |
| H | 0.83155200  | 1.85246200  | 1.97998600  |
| H | -0.49674100 | 1.93069000  | 3.10745200  |
| H | 2.12285900  | -0.71478700 | 2.02470300  |
| C | 2.50881800  | -1.22879100 | -0.05497400 |
| H | 1.96967200  | -1.10610700 | -1.00724700 |
| H | 2.56940000  | -2.29438500 | 0.18483300  |
| O | 0.38030200  | -0.25898800 | -2.36782700 |

qant $TS_{20}^i$

E (SMD/B3LYP-D3/BS1) = -2792.47354458 au

G (SMD/B3LYP-D3/BS1) = -2791.594533 au

E (SMD/B3LYP-D3/BS2//SMD/B3LYP-D3/BS1) = -5468.23697435 au

negative eigenvalue of the frequency: 1682i

charge = 3 spin multiplicity = 5

|    |             |             |             |
|----|-------------|-------------|-------------|
| Ni | -1.39833300 | -0.66876200 | -0.54160300 |
| N  | -2.14807200 | -1.85614700 | -2.23105800 |
| C  | -1.85214400 | -3.32592900 | -2.17303700 |
| H  | -2.69210500 | -3.83538600 | -1.70323600 |
| C  | -3.62013200 | -1.68253000 | -2.40978300 |
| H  | -3.93770100 | -2.26979700 | -3.28296600 |
| H  | -3.82239000 | -0.63471900 | -2.62723900 |
| C  | -1.85135000 | 0.07265800  | -3.92955100 |
| C  | -0.79733500 | -3.63066700 | 0.08749700  |
| C  | -0.79423900 | -4.78648400 | 0.87559500  |
| C  | -1.05388400 | -4.69419100 | 2.23996000  |
| H  | -0.58899600 | -5.74457800 | 0.40961500  |
| C  | -1.27793900 | -2.33264900 | 1.95009600  |
| C  | -1.29482000 | -3.43625700 | 2.79266700  |
| H  | -1.05607100 | -5.58477800 | 2.86136100  |
| H  | -1.43970100 | -1.33610100 | 2.33655600  |
| H  | -1.48567800 | -3.30424000 | 3.85232900  |
| C  | -4.50873600 | -1.12400700 | -0.04515200 |
| C  | -5.73531000 | -0.86416100 | 0.58156600  |
| C  | -3.42828800 | 0.19316600  | 1.52235900  |
| C  | -5.79138000 | -0.05362800 | 1.71075100  |

|    |             |             |             |
|----|-------------|-------------|-------------|
| H  | -6.63727400 | -1.31144200 | 0.17679100  |
| C  | -4.60192800 | 0.48194100  | 2.20272100  |
| H  | -2.48882900 | 0.59039500  | 1.87454700  |
| H  | -6.74063300 | 0.14946500  | 2.19777400  |
| H  | -4.57147100 | 1.11189500  | 3.08535000  |
| C  | -2.12973000 | 1.21613300  | -2.98151900 |
| C  | -2.56932400 | 2.42207400  | -3.55070600 |
| C  | -2.87434900 | 3.50938000  | -2.74382000 |
| H  | -2.66884300 | 2.48512500  | -4.62995000 |
| C  | -2.29793700 | 2.15007400  | -0.87108800 |
| C  | -2.73428200 | 3.36950700  | -1.36169200 |
| H  | -3.21209700 | 4.44437600  | -3.18060300 |
| H  | -2.17940300 | 2.00764000  | 0.19015700  |
| H  | -2.95118200 | 4.18013000  | -0.67462400 |
| N  | -1.99701700 | 1.08728700  | -1.64606500 |
| N  | -1.04809900 | -2.41897900 | 0.62663000  |
| N  | -3.36281800 | -0.57499900 | 0.41673300  |
| C  | -1.41538300 | -1.29974200 | -3.41528100 |
| H  | -1.53676600 | -1.99068700 | -4.25985800 |
| H  | -0.35677400 | -1.28438800 | -3.16324300 |
| H  | -2.74736400 | -0.04307700 | -4.55047700 |
| H  | -1.06584100 | 0.39865100  | -4.62355900 |
| C  | -4.46985500 | -2.08773400 | -1.20329900 |
| H  | -4.16448800 | -3.06584600 | -0.81300600 |
| H  | -5.49337100 | -2.22254400 | -1.56538600 |
| H  | -1.78474000 | -3.70709600 | -3.19885300 |
| C  | -0.58656100 | -3.70389300 | -1.40031500 |
| H  | 0.25263900  | -3.07506700 | -1.70577600 |
| H  | -0.31769700 | -4.72808300 | -1.67330600 |
| O  | 0.56983900  | -0.43830800 | -1.27555500 |
| Ni | 1.69296400  | 0.26240900  | 0.07545700  |
| N  | 2.86635000  | 0.90174700  | 1.68741200  |
| C  | 2.77772700  | -0.00455600 | 2.91879400  |
| H  | 3.74941700  | -0.48266800 | 3.04808500  |
| C  | 4.30656100  | 0.99859200  | 1.28714900  |
| H  | 4.87454000  | 1.25582900  | 2.18879300  |
| H  | 4.40689400  | 1.82319800  | 0.58306600  |
| C  | 2.60255700  | 3.45211500  | 1.21594500  |
| C  | 2.00727700  | -2.18480200 | 1.97463800  |
| C  | 2.24204500  | -3.49660500 | 2.39689400  |
| C  | 2.62666700  | -4.46049700 | 1.46926700  |
| H  | 2.12446100  | -3.74447600 | 3.44631400  |
| C  | 2.52166300  | -2.76590600 | -0.21175300 |
| C  | 2.77665800  | -4.08645100 | 0.13350500  |
| H  | 2.80929800  | -5.48390800 | 1.78273500  |
| H  | 2.64137300  | -2.43940900 | -1.23861000 |
| H  | 3.08079300  | -4.79495500 | -0.62909800 |

|   |             |             |             |
|---|-------------|-------------|-------------|
| C | 4.55884800  | -0.31133200 | -0.81897700 |
| C | 5.54256400  | -0.66119800 | -1.74856400 |
| C | 3.04906900  | 0.08192700  | -2.54489300 |
| C | 5.25990900  | -0.63528000 | -3.10933100 |
| H | 6.52620200  | -0.94022700 | -1.38600500 |
| C | 3.98685500  | -0.23797100 | -3.51552600 |
| H | 2.04534400  | 0.35805500  | -2.82425200 |
| H | 6.01930000  | -0.90623300 | -3.83631300 |
| H | 3.71022200  | -0.17928300 | -4.56250200 |
| C | 1.88257100  | 3.46699400  | -0.10586300 |
| C | 1.70004700  | 4.70952700  | -0.73225500 |
| C | 1.08135100  | 4.78323500  | -1.97258600 |
| H | 2.05280700  | 5.60515800  | -0.23055600 |
| C | 0.83172800  | 2.40950400  | -1.87715800 |
| C | 0.63775700  | 3.59882000  | -2.56220700 |
| H | 0.94089000  | 5.74080300  | -2.46526300 |
| H | 0.47334000  | 1.47305100  | -2.27360800 |
| H | 0.13426700  | 3.58910200  | -3.52153200 |
| N | 1.44976700  | 2.32706500  | -0.67890700 |
| N | 2.13761400  | -1.83424400 | 0.67964000  |
| N | 3.31489300  | 0.03725600  | -1.22088700 |
| C | 2.43460600  | 2.26638800  | 2.15301000  |
| H | 3.03100800  | 2.49668700  | 3.04336100  |
| H | 1.40225500  | 2.17197500  | 2.46882400  |
| H | 3.66369900  | 3.65664700  | 1.03123300  |
| H | 2.24837200  | 4.31445000  | 1.79347700  |
| C | 4.88439100  | -0.25654100 | 0.64505700  |
| H | 4.54860400  | -1.16652700 | 1.15111500  |
| H | 5.97127400  | -0.22352900 | 0.75713700  |
| H | 2.62384200  | 0.64738500  | 3.77986300  |
| C | 1.69068000  | -1.07792600 | 2.93436700  |
| H | 0.72711400  | -0.63017200 | 2.69175800  |
| H | 1.64549300  | -1.47358400 | 3.95321100  |
| O | -0.01951800 | 0.30941900  | 0.94072700  |
| H | 0.96902700  | -1.27890500 | -1.55640700 |
| H | -0.33734100 | 1.33255000  | 1.49163700  |
| C | -1.43607000 | 4.48282000  | 2.83128600  |
| C | -1.72478100 | 4.07273500  | 4.13661300  |
| C | -1.52955700 | 2.74285700  | 4.52283100  |
| C | -1.04328300 | 1.80752700  | 3.59859500  |
| C | -0.78000100 | 2.25040500  | 2.30996800  |
| C | -0.95242300 | 3.56147600  | 1.89114400  |
| H | -1.58411700 | 5.51808800  | 2.53525300  |
| H | -2.10089300 | 4.79368800  | 4.85712000  |
| H | -1.75029300 | 2.42780000  | 5.53926900  |
| H | -0.88037100 | 0.77127100  | 3.88086100  |
| H | -0.72366600 | 3.87091000  | 0.87735400  |

qnt $\text{TS}_{20}^{\text{ii}}$

E (SMD/B3LYP-D3/BS1) = -2792.47927157 au

G (SMD/B3LYP-D3/BS1) = -2791.593445 au

E (SMD/B3LYP-D3/BS2//SMD/B3LYP-D3/BS1) = -5468.23568668 au

negative eigenvalue of the frequency: 436i

charge = 3 spin multiplicity = 5

|    |             |             |             |
|----|-------------|-------------|-------------|
| Ni | 2.05172100  | 0.08423200  | -0.05866700 |
| N  | 4.08763100  | 0.73728500  | -0.26982200 |
| C  | 5.01785700  | 0.26412700  | 0.79983500  |
| H  | 5.32462600  | -0.75365600 | 0.56424500  |
| C  | 4.64281700  | 0.34232300  | -1.59919100 |
| H  | 5.63849000  | 0.79534800  | -1.70838000 |
| H  | 4.00163600  | 0.76222000  | -2.37252300 |
| C  | 3.41849400  | 2.97341000  | -1.38370300 |
| C  | 3.56687700  | -0.94184300 | 2.48518000  |
| C  | 3.81171600  | -1.76646500 | 3.58883900  |
| C  | 3.05155700  | -2.91706400 | 3.78038900  |
| H  | 4.60595900  | -1.50353500 | 4.27992400  |
| C  | 1.87510600  | -2.36181400 | 1.77677400  |
| C  | 2.06658500  | -3.22979400 | 2.84477700  |
| H  | 3.23573500  | -3.56355200 | 4.63333800  |
| H  | 1.12676500  | -2.57808400 | 1.02582100  |
| H  | 1.45537400  | -4.12085000 | 2.93079900  |
| C  | 3.50105400  | -1.95508900 | -2.05101400 |
| C  | 3.55527500  | -3.10002000 | -2.86080700 |
| C  | 1.26723200  | -2.38064000 | -1.59371100 |
| C  | 2.43300700  | -3.90412300 | -3.01380000 |
| H  | 4.48778400  | -3.34866900 | -3.35783300 |
| C  | 1.25590100  | -3.53610900 | -2.36055200 |
| H  | 0.37626800  | -2.04718700 | -1.07624500 |
| H  | 2.47264300  | -4.79623600 | -3.63187100 |
| H  | 0.34936100  | -4.12534700 | -2.43985600 |
| C  | 2.15673600  | 2.49781000  | -2.07093200 |
| C  | 1.67398100  | 3.26663100  | -3.14027900 |
| C  | 0.61682800  | 2.80171300  | -3.91213000 |
| H  | 2.15707400  | 4.21192600  | -3.36794600 |
| C  | 0.54746400  | 0.88245400  | -2.49599800 |
| C  | 0.05327200  | 1.56420300  | -3.59682900 |
| H  | 0.24361700  | 3.38675600  | -4.74737100 |
| H  | 0.10494800  | -0.05261600 | -2.18013000 |
| H  | -0.77028000 | 1.14805200  | -4.16643700 |
| N  | 1.57010000  | 1.33057700  | -1.73969500 |
| N  | 2.58692900  | -1.23286200 | 1.59949500  |
| N  | 2.35855500  | -1.60274000 | -1.42503700 |
| C  | 3.99109000  | 2.22837600  | -0.17572500 |
| H  | 4.99676700  | 2.63870700  | -0.00948900 |

|    |             |             |             |
|----|-------------|-------------|-------------|
| H  | 3.40492800  | 2.45051200  | 0.71185300  |
| H  | 4.18747600  | 3.03475000  | -2.16341200 |
| H  | 3.26324300  | 4.00908800  | -1.05683200 |
| C  | 4.76911400  | -1.15773600 | -1.86087800 |
| H  | 5.36591200  | -1.65289500 | -1.08648100 |
| H  | 5.36083700  | -1.25634500 | -2.77719900 |
| H  | 5.91921900  | 0.89092200  | 0.77431100  |
| C  | 4.44122600  | 0.25546900  | 2.21713700  |
| H  | 3.90112900  | 1.18041100  | 2.42585500  |
| H  | 5.28223900  | 0.23662900  | 2.91615900  |
| O  | 0.79169100  | 1.25451100  | 1.24580200  |
| O  | -0.05472100 | -0.22060200 | 0.30854000  |
| H  | -0.03427700 | -0.67835300 | 1.16538400  |
| Ni | -2.05672900 | -0.44971100 | -0.33090300 |
| N  | -3.64649500 | -1.11335400 | -1.56593000 |
| C  | -3.69344600 | -2.60111400 | -1.74000200 |
| H  | -4.29018100 | -3.03425000 | -0.93819600 |
| C  | -4.94144500 | -0.63246200 | -1.00363500 |
| H  | -5.76394400 | -1.02552200 | -1.61574000 |
| H  | -4.96219500 | 0.45468600  | -1.07295000 |
| C  | -3.64579300 | 0.94705000  | -3.10397600 |
| C  | -1.86749600 | -3.49053700 | -0.30814700 |
| C  | -1.59523100 | -4.76897600 | 0.18391000  |
| C  | -1.33728700 | -4.94324100 | 1.54212600  |
| H  | -1.60625300 | -5.61372800 | -0.49687600 |
| C  | -1.62525100 | -2.58512900 | 1.82046500  |
| C  | -1.37304700 | -3.83026000 | 2.38280400  |
| H  | -1.12681500 | -5.93153200 | 1.93972900  |
| H  | -1.64819700 | -1.69471000 | 2.43886100  |
| H  | -1.19661300 | -3.91442400 | 3.44929500  |
| C  | -4.45336900 | -0.17571000 | 1.49403400  |
| C  | -5.12559500 | 0.21132700  | 2.65890900  |
| C  | -2.49639200 | 0.83134400  | 2.27501900  |
| C  | -4.44736700 | 0.90236100  | 3.65742000  |
| H  | -6.17237600 | -0.04928300 | 2.77553800  |
| C  | -3.10088700 | 1.21062700  | 3.46546800  |
| H  | -1.45144000 | 1.05240600  | 2.07879200  |
| H  | -4.95872600 | 1.19063400  | 4.57112500  |
| H  | -2.51955700 | 1.72149400  | 4.22175200  |
| C  | -2.89984800 | 1.92589800  | -2.23592700 |
| C  | -2.98502800 | 3.28181500  | -2.57912300 |
| C  | -2.25074400 | 4.22407200  | -1.87530400 |
| H  | -3.61402600 | 3.57026700  | -3.41570400 |
| C  | -1.40693400 | 2.42779700  | -0.52966700 |
| C  | -1.43075000 | 3.78010400  | -0.83734900 |
| H  | -2.29846300 | 5.27626800  | -2.14023000 |
| H  | -0.74466700 | 2.04405500  | 0.23945300  |



|   |             |             |             |
|---|-------------|-------------|-------------|
| H | -0.81035300 | 4.46594200  | -0.27610000 |
| N | -2.13899500 | 1.50628500  | -1.20279600 |
| N | -1.84983900 | -2.40980100 | 0.50393400  |
| N | -3.15366400 | 0.14953500  | 1.31138500  |
| C | -3.36152100 | -0.53263500 | -2.92031300 |
| H | -3.96266100 | -1.06785300 | -3.66529400 |
| H | -2.30887800 | -0.73652600 | -3.13992400 |
| H | -4.72050600 | 1.14951000  | -3.03409100 |
| H | -3.38322100 | 1.17255600  | -4.14526400 |
| C | -5.16674300 | -1.01817900 | 0.46409100  |
| H | -4.89755000 | -2.06623200 | 0.64287800  |
| H | -6.24115400 | -0.94914700 | 0.65715900  |
| H | -4.21095700 | -2.82401600 | -2.67969900 |
| C | -2.30390800 | -3.25153100 | -1.72706800 |
| H | -1.58302200 | -2.61733800 | -2.25482400 |
| H | -2.34443600 | -4.20305600 | -2.26309300 |
| C | -0.35860300 | 3.33027800  | 4.03520600  |
| C | 0.62061400  | 2.41088700  | 3.70117300  |
| C | 1.42739800  | 2.60985000  | 2.54763300  |
| C | 1.24715300  | 3.78300100  | 1.77471500  |
| C | 0.25069100  | 4.69572000  | 2.10878500  |
| C | -0.54922200 | 4.47033700  | 3.23293800  |
| H | -0.97212100 | 3.19156800  | 4.91989600  |
| H | 0.78689700  | 1.52898300  | 4.31272500  |
| H | 2.36122400  | 2.07067300  | 2.50198800  |
| H | 1.88206600  | 3.96721300  | 0.91608700  |
| H | 0.10576800  | 5.59042500  | 1.51114000  |
| H | -1.31902600 | 5.18950100  | 3.49899100  |

benzene

E (SMD/B3LYP-D3/BS1) = -232.257007836 au

G (SMD/B3LYP-D3/BS1) = -232.183727 au

E (SMD/B3LYP-D3/BS2//SMD/B3LYP-D3/BS1) = -232.350339115 au

charge = 0 spin multiplicity = 1

|   |             |             |             |
|---|-------------|-------------|-------------|
| C | 0.74225100  | -1.18545000 | 0.00003300  |
| C | 1.39775000  | 0.05008300  | -0.00006000 |
| C | 0.65551900  | 1.23550300  | 0.00003800  |
| C | -0.74224900 | 1.18545100  | 0.00001000  |
| C | -1.39776100 | -0.05007900 | 0.00000800  |
| C | -0.65550700 | -1.23550800 | 0.00001500  |
| H | 1.31927800  | -2.10680600 | 0.00012300  |
| H | 2.48422200  | 0.08899600  | -0.00020300 |
| H | 1.16514200  | 2.19579100  | 0.00012400  |
| H | -1.31928000 | 2.10680700  | -0.00008100 |
| H | -2.48422000 | -0.08900400 | -0.00015500 |
| H | -1.16516100 | -2.19578400 | -0.00007600 |

phenol

E (SMD/B3LYP-D3/BS1) = -307.477820852 au

G (SMD/B3LYP-D3/BS1) = -307.401897 au

E (SMD/B3LYP-D3/BS2//SMD/B3LYP-D3/BS1) = -307.611661688 au

charge = 0 spin multiplicity = 1

|   |             |             |             |
|---|-------------|-------------|-------------|
| C | -1.85920400 | 0.02992900  | -0.00005300 |
| C | -1.17525200 | -1.19114200 | 0.00009400  |
| C | 0.21927000  | -1.22562700 | -0.00001600 |
| C | 0.94307300  | -0.02538800 | -0.00008000 |
| C | 0.26744500  | 1.20230100  | -0.00004100 |
| C | -1.12966400 | 1.22204100  | 0.00009900  |
| H | -2.94529500 | 0.05091500  | -0.00032100 |
| H | -1.73034000 | -2.12584900 | 0.00011800  |
| H | 0.76119000  | -2.16691600 | -0.00003800 |
| H | 0.83445400  | 2.13085200  | -0.00007400 |
| H | -1.64673400 | 2.17827100  | 0.00005700  |
| O | 2.30590600  | -0.11527900 | -0.00002100 |
| H | 2.68546900  | 0.78227400  | 0.00041200  |

H<sub>2</sub>O<sub>2</sub>

E (SMD/B3LYP-D3/BS1) = -151.540993689 au

G (SMD/B3LYP-D3/BS1) = -151.537271 au

E (SMD/B3LYP-D3/BS2//SMD/B3LYP-D3/BS1) = -151.629374358 au

charge = 0 spin multiplicity = 1

|   |             |             |             |
|---|-------------|-------------|-------------|
| O | 0.71843700  | 0.10839300  | -0.06527500 |
| O | -0.71843400 | -0.10838900 | -0.06528100 |
| H | -1.00984300 | 0.61689500  | 0.52223400  |
| H | 1.00981600  | -0.61692500 | 0.52221300  |

H<sub>2</sub>O

E (SMD/B3LYP-D3/BS1) = -76.4149480395 au

G (SMD/B3LYP-D3/BS1) = -76.411728 au

E (SMD/B3LYP-D3/BS2//SMD/B3LYP-D3/BS1) = -76.4712360487 au

charge = 0 spin multiplicity = 1

|   |            |             |             |
|---|------------|-------------|-------------|
| O | 0.00000000 | 0.00000000  | 0.12081600  |
| H | 0.00000000 | 0.76098900  | -0.48326200 |
| H | 0.00000000 | -0.76098900 | -0.48326200 |

(H<sub>2</sub>O)<sub>3</sub>

E (SMD/B3LYP-D3/BS1) = -229.272485845 au

G (SMD/B3LYP-D3/BS1) = -229.231070 au

E (SMD/B3LYP-D3/BS2//SMD/B3LYP-D3/BS1) = -229.429865365 au

charge = 0 spin multiplicity = 1

|   |            |             |             |
|---|------------|-------------|-------------|
| O | 1.24194500 | -1.26080800 | 0.00988300  |
| H | 1.29676300 | -0.28809100 | -0.08024300 |
| H | 0.27814500 | -1.37907500 | 0.06270700  |

|   |             |             |             |
|---|-------------|-------------|-------------|
| O | 0.58013600  | 1.51536500  | -0.10599700 |
| H | -0.28343000 | 1.04659000  | -0.10372400 |
| H | 0.69760300  | 1.78011000  | 0.82262100  |
| O | -1.53779700 | -0.31680200 | 0.00840100  |
| H | -2.14392700 | -0.25678200 | 0.76797900  |
| H | -2.11942600 | -0.40479800 | -0.76763200 |

MeCN

E (SMD/B3LYP-D3/BS1) = -132.761905656 au

G (SMD/B3LYP-D3/BS1) = -132.740401 au

E (SMD/B3LYP-D3/BS2//SMD/B3LYP-D3/BS1) = -132.821565301 au

charge = 0 spin multiplicity = 1

|   |             |             |             |
|---|-------------|-------------|-------------|
| C | -0.27799700 | 0.00007400  | 0.00021500  |
| C | 1.18002400  | 0.00000100  | -0.00005000 |
| H | 1.55386600  | -0.46140000 | 0.91980100  |
| H | 1.55363500  | -0.56615300 | -0.85953100 |
| H | 1.55387600  | 1.02732800  | -0.06057400 |
| N | -1.43907800 | -0.00003200 | -0.00009800 |

Et<sub>3</sub>N

phenol

E (SMD/B3LYP-D3/BS1) = -292.43269277 au

G (SMD/B3LYP-D3/BS1) = -292.259695 au

E (SMD/B3LYP-D3/BS2//SMD/B3LYP-D3/BS1) = -292.550773363 au

charge = 0 spin multiplicity = 1

|   |             |             |             |
|---|-------------|-------------|-------------|
| N | -0.17136500 | 0.01754600  | -0.37641800 |
| C | 0.26747200  | 1.12496900  | 0.48353400  |
| H | -0.59830200 | 1.77525300  | 0.64709000  |
| H | 0.57629200  | 0.76958200  | 1.48533600  |
| C | 0.89651900  | -0.93575300 | -0.71509300 |
| H | 0.46542800  | -1.66577900 | -1.41185400 |
| H | 1.66992700  | -0.39942500 | -1.27654100 |
| C | -1.36694500 | -0.64800400 | 0.16120100  |
| H | -1.47121200 | -1.60876200 | -0.35680000 |
| H | -1.25937700 | -0.88414400 | 1.23667100  |
| C | 1.55400900  | -1.68605300 | 0.45478500  |
| H | 0.81773300  | -2.25955100 | 1.03001600  |
| H | 2.30366600  | -2.39016800 | 0.07305900  |
| H | 2.06222600  | -1.00089500 | 1.14301400  |
| C | 1.39036100  | 1.96605700  | -0.12478500 |
| H | 1.55488700  | 2.86239400  | 0.48471300  |
| H | 2.34000300  | 1.42204000  | -0.17259500 |
| H | 1.12712900  | 2.28479600  | -1.14071400 |
| C | -2.64897500 | 0.16044700  | -0.05500000 |
| H | -3.51869800 | -0.41402900 | 0.28672900  |
| H | -2.64274500 | 1.10627700  | 0.49797500  |
| H | -2.78204900 | 0.38961700  | -1.11902900 |

Et<sub>3</sub>NH<sup>+</sup>

E (SMD/B3LYP-D3/BS1) = -292.91518812 au

G (SMD/B3LYP-D3/BS1) = -292.725131 au

E (SMD/B3LYP-D3/BS2//SMD/B3LYP-D3/BS1) = -293.029539206 au

charge = 1 spin multiplicity = 1

|   |             |             |             |
|---|-------------|-------------|-------------|
| N | 0.16986300  | 0.00782900  | 0.39825700  |
| C | -0.28324800 | 1.16034100  | -0.47659900 |
| H | 0.56889900  | 1.83702700  | -0.54501600 |
| H | -0.47426700 | 0.74413800  | -1.46719000 |
| C | -0.92459800 | -0.99853900 | 0.71146000  |
| H | -0.46446400 | -1.72809000 | 1.38150300  |
| H | -1.68694500 | -0.45875200 | 1.27461400  |
| C | 1.41997100  | -0.66058000 | -0.14440600 |
| H | 1.54582900  | -1.57896200 | 0.43272500  |
| H | 1.21104500  | -0.92481800 | -1.18230300 |
| C | -1.51280300 | -1.66927100 | -0.51932600 |
| H | -0.75629100 | -2.21011900 | -1.09558600 |
| H | -2.25884000 | -2.39527800 | -0.17973300 |
| H | -2.01712300 | -0.95485800 | -1.17684600 |
| C | -1.49486100 | 1.88966100  | 0.08300500  |
| H | -1.65485600 | 2.79301400  | -0.51454500 |
| H | -2.40594500 | 1.28699700  | 0.03148900  |
| H | -1.32928200 | 2.19635500  | 1.12232400  |
| C | 2.65533800  | 0.21961400  | -0.02100200 |
| H | 3.52655100  | -0.37106500 | -0.32279600 |
| H | 2.61086600  | 1.10198600  | -0.66522000 |
| H | 2.80823800  | 0.54261000  | 1.01539400  |
| H | 0.42874800  | 0.41765600  | 1.30460100  |
